# Supplementary material for: GATA transcription factors, SOX17 and TFAP2C, drive the human germ-cell specification program
Source: PubMed Central journal article supplement (PMC7918644; doi:10.26508/lsa.202000974), 2021-02-19
Supplement: LSA-2020-00974_SdataFS1_FS4.pdf [file LSA-2020-00974_SdataFS1_FS4.pdf]

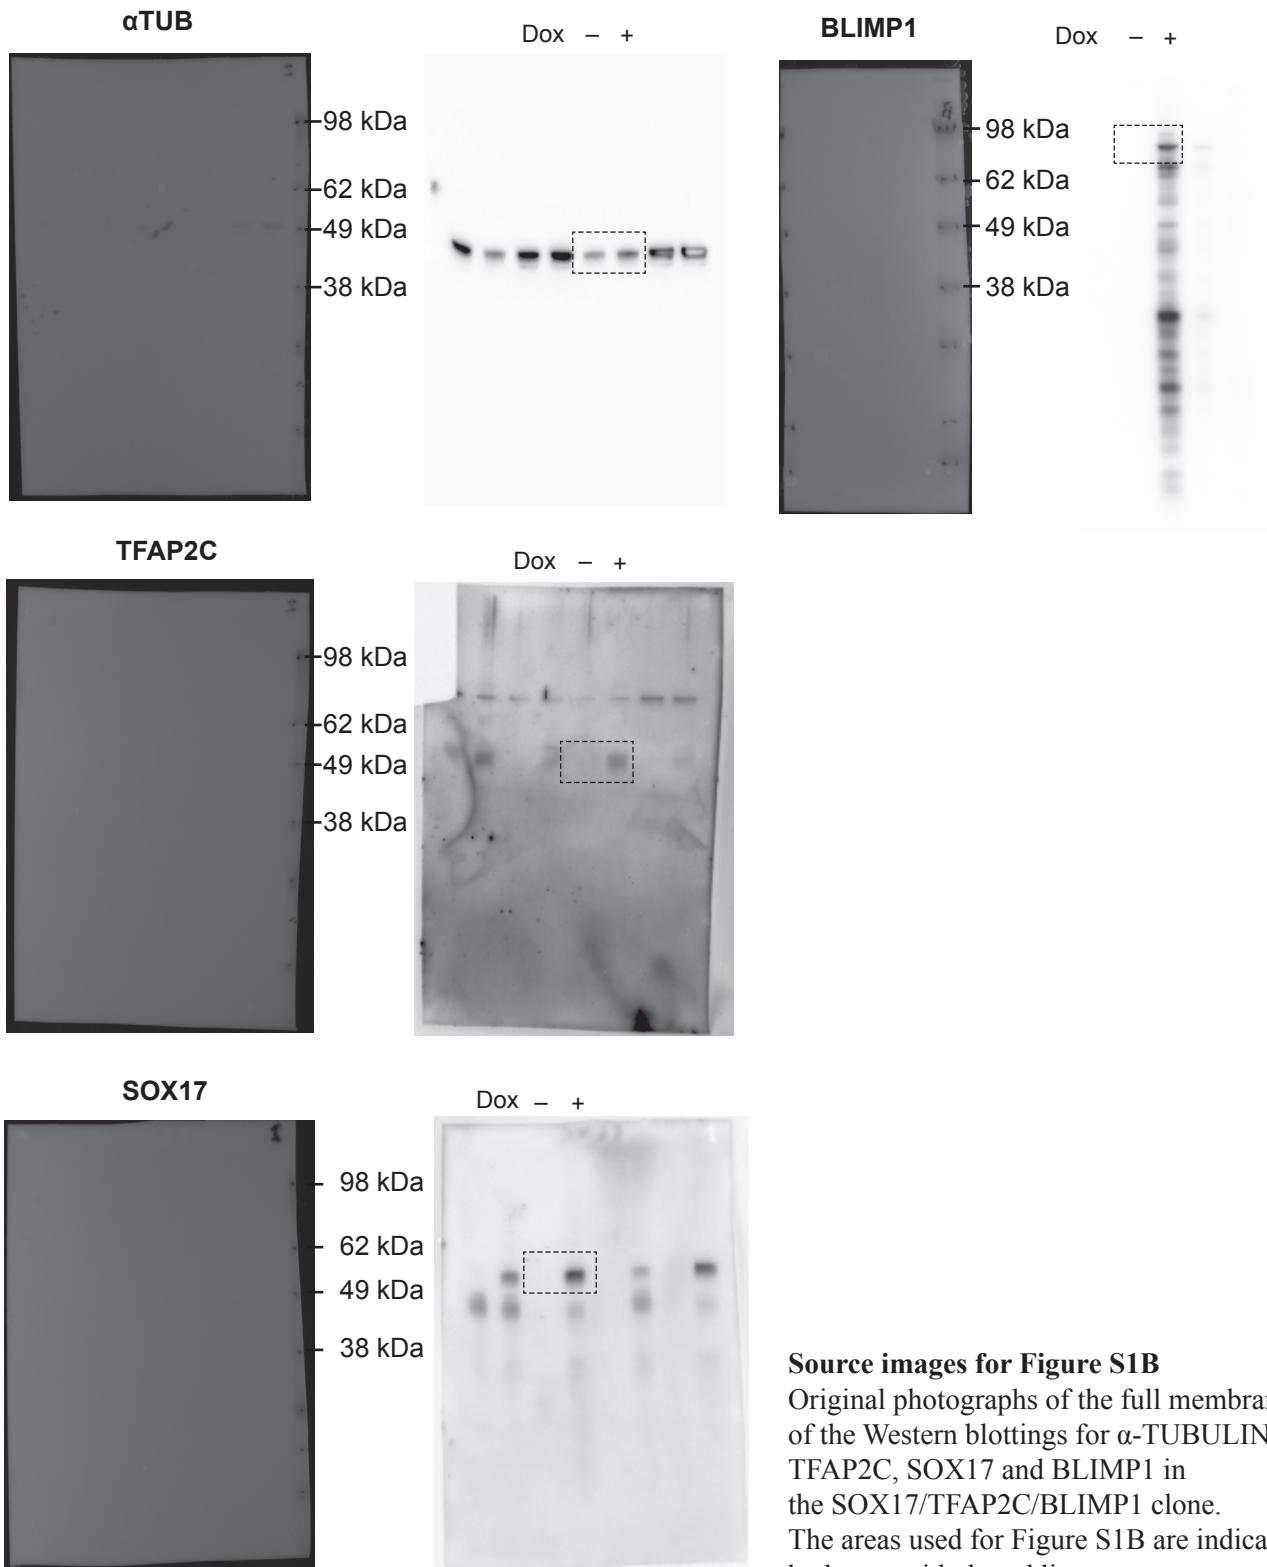

**Source images for Figure S1B**

Original photographs of the full membranes of the Western blottings for  $\alpha$ -TUBULIN, TFAP2C, SOX17 and BLIMP1 in the SOX17/TFAP2C/BLIMP1 clone. The areas used for Figure S1B are indicated by boxes with dotted lines.

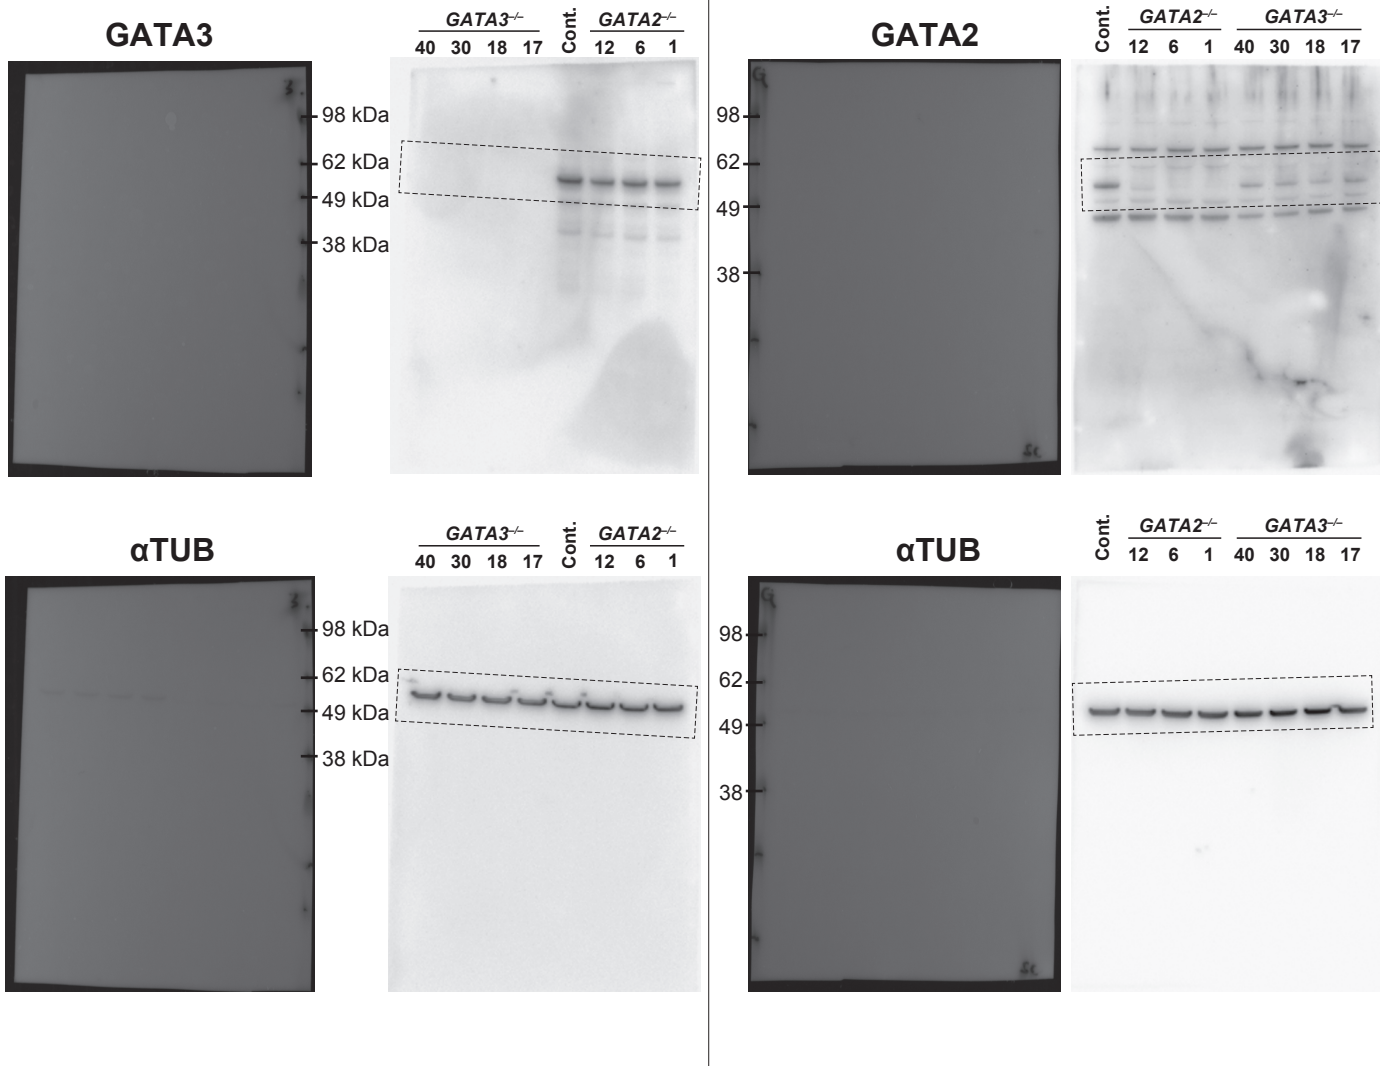

### Source images for Figure S4B

Original photographs of the full membranes of the Western blottings for GATA3, GATA2 and  $\alpha$ -TUBULIN in the *GATA3*<sup>-/-</sup> and *GATA2*<sup>-/-</sup> clones. The areas used for Figure S4B are indicated by boxes with dotted lines.

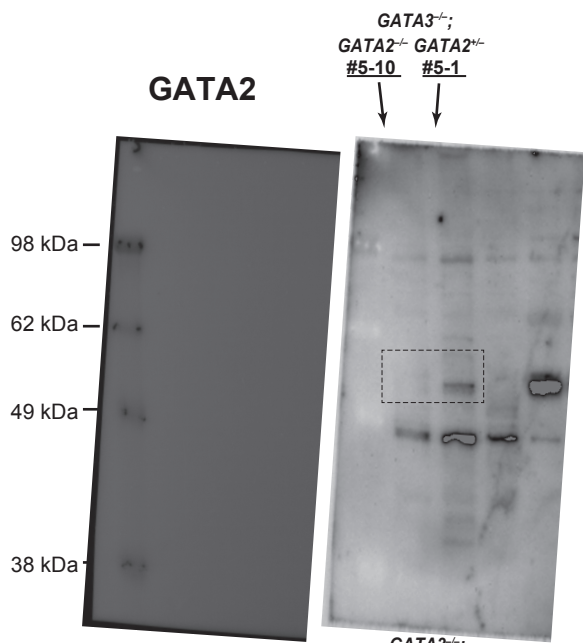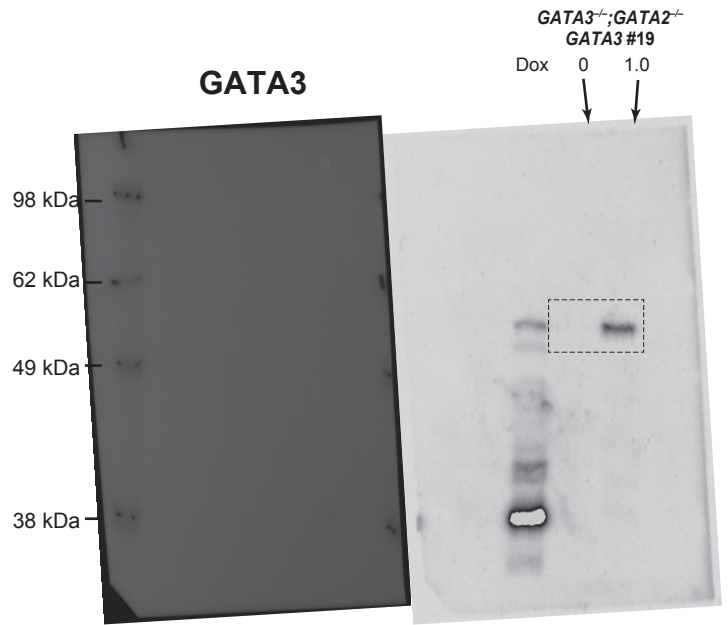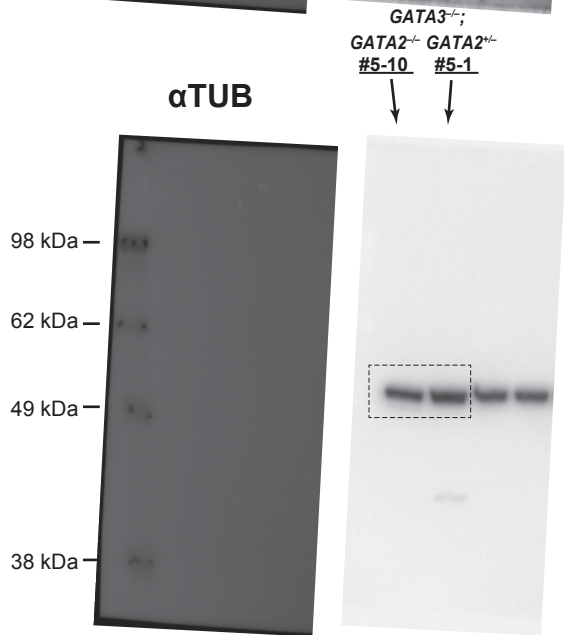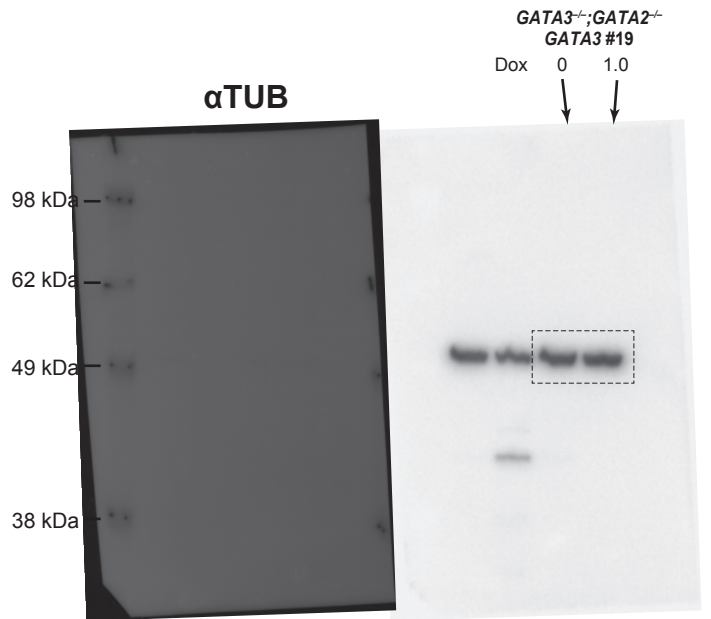

### Source images for Figure S4B

Original photographs of the full membranes of the Western blotting for GATA2, GATA3 and  $\alpha$ -TUBULIN in GATA3<sup>-/-</sup>;GATA2<sup>+/-</sup> #5-1, GATA3<sup>-/-</sup>;GATA2<sup>+/-</sup> #5-10 and GATA3<sup>+/-</sup>;GATA2<sup>+/-</sup>;GATA3 #19 clones. The areas used for Figure S4B are indicated by boxes with dotted lines.
