# Supplementary material for: GATA transcription factors, SOX17 and TFAP2C, drive the human germ-cell specification program
Source: Life Sci Alliance. 2021 Feb 19;4(5):e202000974. doi: 10.26508/lsa.202000974 (PMC7918644; doi:10.26508/lsa.202000974)
Supplement: Supplementary file 2 [file LSA-2020-00974_TableS1.xlsx]

## Sheet: 20191105 SampleList
		code	genotype	title	source name	sampled time point	reporter transgene	description	SampleID	cDNA_name	Description	Line	State	LineID	clone	Series	Series_C	Rep	Genotype	Type	Treatment		Sort	PGCLC induced
sample 15	15	MS151Y095	Dox-inducible TFAP2C, BLIMP1	Dox-inducible TFAP2C, BLIMP1, clone_2; iPSC, MS151Y095	iPSC, from 585B1 hiPSC BTAG reporter line	iPSC	Blimp1-tdTomato, TFAP2C-EGFP	Transcriptome of amplified cDNA from PGCLC induction of Dox-inducible TFAP2C, BLIMP1 series, clone 2, harvested at iPSC, non-sorted	MS151_095	YK_481	AB2_iPSC_I3_481	AB2.iPSC.I3	iPSC	AB2	2	AB	AB		ABOP	AB_iPSC			non
sample 18	18	MS151Y098	Dox-inducible TFAP2C, BLIMP1	Dox-inducible TFAP2C, BLIMP1, clone_2; day2, MS151Y098	day2, from 585B1 hiPSC BTAG reporter line	day2	Blimp1-tdTomato, TFAP2C-EGFP	Transcriptome of amplified cDNA from PGCLC induction of Dox-inducible TFAP2C, BLIMP1 series, clone 2, harvested at day2, BT-sorted	MS151_098	YK_484	AB2_D_d2_BT_I3_484	AB2.D.d2.BT.I3	day2	AB2	2	AB	AB		ABOP	AB_day2_D	D	Dox	BT
sample 21	21	MS151Y101	Dox-inducible TFAP2C, BLIMP1	Dox-inducible TFAP2C, BLIMP1, clone_2; day4, MS151Y101	day4, from 585B1 hiPSC BTAG reporter line	day4	Blimp1-tdTomato, TFAP2C-EGFP	Transcriptome of amplified cDNA from PGCLC induction of Dox-inducible TFAP2C, BLIMP1 series, clone 2, harvested at day4, BT-sorted	MS151_101	YK_487	AB2_D_d4_BT_I3_487	AB2.D.d4.BT.I3	day4	AB2	2	AB	AB		ABOP	AB_day4_D	D	Dox	BT
sample 27	27	MS151Y107	Dox-inducible TFAP2C, BLIMP1	Dox-inducible TFAP2C, BLIMP1, clone_2; iPSC, MS151Y107	iPSC, from 585B1 hiPSC BTAG reporter line	iPSC	Blimp1-tdTomato, TFAP2C-EGFP	Transcriptome of amplified cDNA from PGCLC induction of Dox-inducible TFAP2C, BLIMP1 series, clone 2, harvested at iPSC, non-sorted	MS151_107	YK_493	AB2_iPSC_I5_493	AB2.iPSC.I5	iPSC	AB2	2	AB	AB		ABOP	AB_iPSC			non
sample 30	30	MS151Y110	Dox-inducible TFAP2C, BLIMP1	Dox-inducible TFAP2C, BLIMP1, clone_2; iMeLC, MS151Y110	iMeLC, from 585B1 hiPSC BTAG reporter line	iMeLC	Blimp1-tdTomato, TFAP2C-EGFP	Transcriptome of amplified cDNA from PGCLC induction of Dox-inducible TFAP2C, BLIMP1 series, clone 2, harvested at iMeLC, non-sorted	MS151_110	YK_496	AB2_iM_I5_496	AB2.iM.I5	iMeLC	AB2	2	AB	AB		ABOP	AB_iMeLC			non
sample 33	33	MS151Y113	Dox-inducible TFAP2C, BLIMP1	Dox-inducible TFAP2C, BLIMP1, clone_2; day1, MS151Y113	day1, from 585B1 hiPSC BTAG reporter line	day1	Blimp1-tdTomato, TFAP2C-EGFP	Transcriptome of amplified cDNA from PGCLC induction of Dox-inducible TFAP2C, BLIMP1 series, clone 2, harvested at day1, non-sorted	MS151_113	YK_499	AB2_d1_D_I5_499	AB2.d1.D.I5	day1	AB2	2	AB	AB		ABOP	AB_day1_D	D	Dox	non
sample 36	36	MS151Y116	Dox-inducible TFAP2C, BLIMP1	Dox-inducible TFAP2C, BLIMP1, clone_2; day2, MS151Y116	day2, from 585B1 hiPSC BTAG reporter line	day2	Blimp1-tdTomato, TFAP2C-EGFP	Transcriptome of amplified cDNA from PGCLC induction of Dox-inducible TFAP2C, BLIMP1 series, clone 2, harvested at day2, BT-sorted	MS151_116	YK_502	AB2_D_d2_BT_I5_502	AB2.D.d2.BT.I5	day2	AB2	2	AB	AB		ABOP	AB_day2_D	D	Dox	BT
sample 39	39	MS151Y119	Dox-inducible TFAP2C, BLIMP1	Dox-inducible TFAP2C, BLIMP1, clone_2; day4, MS151Y119	day4, from 585B1 hiPSC BTAG reporter line	day4	Blimp1-tdTomato, TFAP2C-EGFP	Transcriptome of amplified cDNA from PGCLC induction of Dox-inducible TFAP2C, BLIMP1 series, clone 2, harvested at day4, BT-sorted	MS151_119	YK_505	AB2_D_d4_BT_I5_505	AB2.D.d4.BT.I5	day4	AB2	2	AB	AB		ABOP	AB_day4_D	D	Dox	BT
sample 43	43	MS151Y123	Dox-inducible TFAP2C, BLIMP1	Dox-inducible TFAP2C, BLIMP1, clone_2; iMeLC, MS151Y123	iMeLC, from 585B1 hiPSC BTAG reporter line	iMeLC	Blimp1-tdTomato, TFAP2C-EGFP	Transcriptome of amplified cDNA from PGCLC induction of Dox-inducible TFAP2C, BLIMP1 series, clone 2, harvested at iMeLC, non-sorted	MS151_123	YK_509	AB2_iM_I6_509	AB2.iM.I6	iMeLC	AB2	2	AB	AB		ABOP	AB_iMeLC			non
sample 46	46	MS151Y126	Dox-inducible TFAP2C, BLIMP1	Dox-inducible TFAP2C, BLIMP1, clone_2; day1, MS151Y126	day1, from 585B1 hiPSC BTAG reporter line	day1	Blimp1-tdTomato, TFAP2C-EGFP	Transcriptome of amplified cDNA from PGCLC induction of Dox-inducible TFAP2C, BLIMP1 series, clone 2, harvested at day1, non-sorted	MS151_126	YK_512	AB2_d1_D_I6_512	AB2.d1.D.I6	day1	AB2	2	AB	AB		ABOP	AB_day1_D	D	Dox	non
sample 49	49	MS152Y49	Dox-inducible TFAP2C, BLIMP1	Dox-inducible TFAP2C, BLIMP1, clone_2; day2, MS152Y49	day2, from 585B1 hiPSC BTAG reporter line	day2	Blimp1-tdTomato, TFAP2C-EGFP	Transcriptome of amplified cDNA from PGCLC induction of Dox-inducible TFAP2C, BLIMP1 series, clone 2, harvested at day2, BT-sorted	MS152_49	YK_515	AB2_D_d2_BT_I6_515	AB2.D.d2.BT.I6	day2	AB2	2	AB	AB		ABOP	AB_day2_D	D	Dox	BT
sample 88	88	MS168Y5	GATA2 KO	GATA2 KO, clone_1; iMeLC, MS168Y5	iMeLC, from 585B1 hiPSC BTAG reporter line	iMeLC	Blimp1-tdTomato, TFAP2C-EGFP	Transcriptome of amplified cDNA from PGCLC induction of GATA2 KO series, clone 1, harvested at iMeLC, non-sorted	MS168_5	YK_576	BAG2_C1_I2_iM_576	BAG2.1.I2.iM	iMeLC	BAG2_1	1	BAG2	BAG2	2	KO	BAG2_KO_iMeLC			non
sample 89	89	MS168Y6	GATA2 KO	GATA2 KO, clone_6; iMeLC, MS168Y6	iMeLC, from 585B1 hiPSC BTAG reporter line	iMeLC	Blimp1-tdTomato, TFAP2C-EGFP	Transcriptome of amplified cDNA from PGCLC induction of GATA2 KO series, clone 6, harvested at iMeLC, non-sorted	MS168_6	YK_577	BAG2_C6_I2_iM_577	BAG2.6.I2.iM	iMeLC	BAG2_6	6	BAG2	BAG2	2	KO	BAG2_KO_iMeLC			non
sample 90	90	MS168Y7	GATA2 KO	GATA2 KO, clone_12; iMeLC, MS168Y7	iMeLC, from 585B1 hiPSC BTAG reporter line	iMeLC	Blimp1-tdTomato, TFAP2C-EGFP	Transcriptome of amplified cDNA from PGCLC induction of GATA2 KO series, clone 12, harvested at iMeLC, non-sorted	MS168_7	YK_578	BAG2_C12_I2_iM_578	BAG2.12.I2.iM	iMeLC	BAG2_12	12	BAG2	BAG2	2	KO	BAG2_KO_iMeLC			non
sample 98	98	MS168Y15	GATA2 KO	GATA2 KO, clone_1; day2, MS168Y15	day2, from 585B1 hiPSC BTAG reporter line	day2	Blimp1-tdTomato, TFAP2C-EGFP	Transcriptome of amplified cDNA from PGCLC induction of GATA2 KO series, clone 1, harvested at day2, BTAG-sorted	MS168_15	YK_586	BAG2_C1_I2_d2_586	BAG2.1.I2.d2	day2	BAG2_1	1	BAG2	BAG2	2	KO	BAG2_KO_day2	B	BMP	BTAG	Y
sample 99	99	MS168Y16	GATA2 KO	GATA2 KO, clone_6; day2, MS168Y16	day2, from 585B1 hiPSC BTAG reporter line	day2	Blimp1-tdTomato, TFAP2C-EGFP	Transcriptome of amplified cDNA from PGCLC induction of GATA2 KO series, clone 6, harvested at day2, BTAG-sorted	MS168_16	YK_587	BAG2_C6_I2_d2_587	BAG2.6.I2.d2	day2	BAG2_6	6	BAG2	BAG2	2	KO	BAG2_KO_day2	B	BMP	BTAG	Y
sample 100	100	MS168Y17	GATA2 KO	GATA2 KO, clone_12; day2, MS168Y17	day2, from 585B1 hiPSC BTAG reporter line	day2	Blimp1-tdTomato, TFAP2C-EGFP	Transcriptome of amplified cDNA from PGCLC induction of GATA2 KO series, clone 12, harvested at day2, BTAG-sorted	MS168_17	YK_588	BAG2_C12_I2_d2_588	BAG2.12.I2.d2	day2	BAG2_12	12	BAG2	BAG2	2	KO	BAG2_KO_day2	B	BMP	BTAG	Y
sample 108	108	MS168Y25	GATA2 KO	GATA2 KO, clone_1; day4, MS168Y25	day4, from 585B1 hiPSC BTAG reporter line	day4	Blimp1-tdTomato, TFAP2C-EGFP	Transcriptome of amplified cDNA from PGCLC induction of GATA2 KO series, clone 1, harvested at day4, BTAG-sorted	MS168_25	YK_596	BAG2_C1_I2_d4_596	BAG2.1.I2.d4	day4	BAG2_1	1	BAG2	BAG2	2	KO	BAG2_KO_day4	B	BMP	BTAG	Y
sample 109	109	MS168Y26	GATA2 KO	GATA2 KO, clone_6; day4, MS168Y26	day4, from 585B1 hiPSC BTAG reporter line	day4	Blimp1-tdTomato, TFAP2C-EGFP	Transcriptome of amplified cDNA from PGCLC induction of GATA2 KO series, clone 6, harvested at day4, BTAG-sorted	MS168_26	YK_597	BAG2_C6_I2_d4_597	BAG2.6.I2.d4	day4	BAG2_6	6	BAG2	BAG2	2	KO	BAG2_KO_day4	B	BMP	BTAG	Y
sample 110	110	MS168Y27	GATA2 KO	GATA2 KO, clone_12; day4, MS168Y27	day4, from 585B1 hiPSC BTAG reporter line	day4	Blimp1-tdTomato, TFAP2C-EGFP	Transcriptome of amplified cDNA from PGCLC induction of GATA2 KO series, clone 12, harvested at day4, BTAG-sorted	MS168_27	YK_598	BAG2_C12_I2_d4_598	BAG2.12.I2.d4	day4	BAG2_12	12	BAG2	BAG2	2	KO	BAG2_KO_day4	B	BMP	BTAG	Y
sample 91	91	MS168Y8	GATA3 KO	GATA3 KO, clone_30; iMeLC, MS168Y8	iMeLC, from 585B1 hiPSC BTAG reporter line	iMeLC	Blimp1-tdTomato, TFAP2C-EGFP	Transcriptome of amplified cDNA from PGCLC induction of GATA3 KO series, clone 30, harvested at iMeLC, non-sorted	MS168_8	YK_579	BAG3_C30_I2_iM_579	BAG3.30.I2.iM	iMeLC	BAG3_30	30	BAG3	BAG3	2	KO	BAG3_KO_iMeLC			non
sample 101	101	MS168Y18	GATA3 KO	GATA3 KO, clone_30; day2, MS168Y18	day2, from 585B1 hiPSC BTAG reporter line	day2	Blimp1-tdTomato, TFAP2C-EGFP	Transcriptome of amplified cDNA from PGCLC induction of GATA3 KO series, clone 30, harvested at day2, BTAG-sorted	MS168_18	YK_589	BAG3_C30_I2_d2_589	BAG3.30.I2.d2	day2	BAG3_30	30	BAG3	BAG3	2	KO	BAG3_KO_day2	B	BMP	BTAG	Y
sample 111	111	MS168Y28	GATA3 KO	GATA3 KO, clone_30; day4, MS168Y28	day4, from 585B1 hiPSC BTAG reporter line	day4	Blimp1-tdTomato, TFAP2C-EGFP	Transcriptome of amplified cDNA from PGCLC induction of GATA3 KO series, clone 30, harvested at day4, BTAG-sorted	MS168_28	YK_599	BAG3_C30_I2_d4_599	BAG3.30.I2.d4	day4	BAG3_30	30	BAG3	BAG3	2	KO	BAG3_KO_day4	B	BMP	BTAG	Y
sample 121	121	MS168Y38	GATA3 KO	GATA3 KO, clone_17; iMeLC, MS168Y38	iMeLC, from 585B1 hiPSC BTAG reporter line	iMeLC	Blimp1-tdTomato, TFAP2C-EGFP	Transcriptome of amplified cDNA from PGCLC induction of GATA3 KO series, clone 17, harvested at iMeLC, non-sorted	MS168_38	YK_609	BAG3_C17_I1_iM_609	BAG3.17.I1.iM	iMeLC	BAG3_17	17	BAG3	BAG3	1	KO	BAG3_KO_iMeLC			non
sample 122	122	MS168Y39	GATA3 KO	GATA3 KO, clone_18; iMeLC, MS168Y39	iMeLC, from 585B1 hiPSC BTAG reporter line	iMeLC	Blimp1-tdTomato, TFAP2C-EGFP	Transcriptome of amplified cDNA from PGCLC induction of GATA3 KO series, clone 18, harvested at iMeLC, non-sorted	MS168_39	YK_610	BAG3_C18_I1_iM_610	BAG3.18.I1.iM	iMeLC	BAG3_18	18	BAG3	BAG3	1	KO	BAG3_KO_iMeLC			non
sample 123	123	MS168Y40	GATA3 KO	GATA3 KO, clone_40; iMeLC, MS168Y40	iMeLC, from 585B1 hiPSC BTAG reporter line	iMeLC	Blimp1-tdTomato, TFAP2C-EGFP	Transcriptome of amplified cDNA from PGCLC induction of GATA3 KO series, clone 40, harvested at iMeLC, non-sorted	MS168_40	YK_611	BAG3_C40_I1_iM_611	BAG3.40.I1.iM	iMeLC	BAG3_40	40	BAG3	BAG3	1	KO	BAG3_KO_iMeLC			non
sample 127	127	MS168Y44	GATA3 KO	GATA3 KO, clone_17; day2, MS168Y44	day2, from 585B1 hiPSC BTAG reporter line	day2	Blimp1-tdTomato, TFAP2C-EGFP	Transcriptome of amplified cDNA from PGCLC induction of GATA3 KO series, clone 17, harvested at day2, BTAG-sorted	MS168_44	YK_615	BAG3_C17_I1_d2_615	BAG3.17.I1.d2	day2	BAG3_17	17	BAG3	BAG3	1	KO	BAG3_KO_day2	B	BMP	BTAG	Y
sample 128	128	MS168Y45	GATA3 KO	GATA3 KO, clone_18; day2, MS168Y45	day2, from 585B1 hiPSC BTAG reporter line	day2	Blimp1-tdTomato, TFAP2C-EGFP	Transcriptome of amplified cDNA from PGCLC induction of GATA3 KO series, clone 18, harvested at day2, BTAG-sorted	MS168_45	YK_616	BAG3_C18_I1_d2_616	BAG3.18.I1.d2	day2	BAG3_18	18	BAG3	BAG3	1	KO	BAG3_KO_day2	B	BMP	BTAG	Y
sample 129	129	MS168Y46	GATA3 KO	GATA3 KO, clone_40; day2, MS168Y46	day2, from 585B1 hiPSC BTAG reporter line	day2	Blimp1-tdTomato, TFAP2C-EGFP	Transcriptome of amplified cDNA from PGCLC induction of GATA3 KO series, clone 40, harvested at day2, BTAG-sorted	MS168_46	YK_617	BAG3_C40_I1_d2_617	BAG3.40.I1.d2	day2	BAG3_40	40	BAG3	BAG3	1	KO	BAG3_KO_day2	B	BMP	BTAG	Y
sample 133	133	MS168Y50	GATA3 KO	GATA3 KO, clone_17; day4, MS168Y50	day4, from 585B1 hiPSC BTAG reporter line	day4	Blimp1-tdTomato, TFAP2C-EGFP	Transcriptome of amplified cDNA from PGCLC induction of GATA3 KO series, clone 17, harvested at day4, BTAG-sorted	MS168_50	YK_621	BAG3_C17_I1_d4_621	BAG3.17.I1.d4	day4	BAG3_17	17	BAG3	BAG3	1	KO	BAG3_KO_day4	B	BMP	BTAG	Y
sample 134	134	MS168Y51	GATA3 KO	GATA3 KO, clone_18; day4, MS168Y51	day4, from 585B1 hiPSC BTAG reporter line	day4	Blimp1-tdTomato, TFAP2C-EGFP	Transcriptome of amplified cDNA from PGCLC induction of GATA3 KO series, clone 18, harvested at day4, BTAG-sorted	MS168_51	YK_622	BAG3_C18_I1_d4_622	BAG3.18.I1.d4	day4	BAG3_18	18	BAG3	BAG3	1	KO	BAG3_KO_day4	B	BMP	BTAG	Y
sample 135	135	MS168Y52	GATA3 KO	GATA3 KO, clone_40; day4, MS168Y52	day4, from 585B1 hiPSC BTAG reporter line	day4	Blimp1-tdTomato, TFAP2C-EGFP	Transcriptome of amplified cDNA from PGCLC induction of GATA3 KO series, clone 40, harvested at day4, BTAG-sorted	MS168_52	YK_623	BAG3_C40_I1_d4_623	BAG3.40.I1.d4	day4	BAG3_40	40	BAG3	BAG3	1	KO	BAG3_KO_day4	B	BMP	BTAG	Y
sample 149	149	MS188Y102	GATA3 KO	GATA3 KO, clone_17; day2, MS188Y102	day2, from 585B1 hiPSC BTAG reporter line	day2	Blimp1-tdTomato, TFAP2C-EGFP	Transcriptome of amplified cDNA from PGCLC induction of GATA3 KO series, clone 17, harvested at day2, BTAG-sorted	MS188_102	YK_646	BAG17_I3_d2_646	BAG17.I3.d2	day2	BAG3_17	17	BAG3	BAG3	2	KO	BAG3_KO_day2	B	BMP	BTAG	Y
sample 150	150	MS188Y103	GATA3 KO	GATA3 KO, clone_18; day2, MS188Y103	day2, from 585B1 hiPSC BTAG reporter line	day2	Blimp1-tdTomato, TFAP2C-EGFP	Transcriptome of amplified cDNA from PGCLC induction of GATA3 KO series, clone 18, harvested at day2, BTAG-sorted	MS188_103	YK_647	BAG18_I3_d2_647	BAG18.I3.d2	day2	BAG3_18	18	BAG3	BAG3	2	KO	BAG3_KO_day2	B	BMP	BTAG	Y
sample 151	151	MS188Y104	GATA3 KO	GATA3 KO, clone_30; day2, MS188Y104	day2, from 585B1 hiPSC BTAG reporter line	day2	Blimp1-tdTomato, TFAP2C-EGFP	Transcriptome of amplified cDNA from PGCLC induction of GATA3 KO series, clone 30, harvested at day2, BTAG-sorted	MS188_104	YK_648	BAG30_I3_d2_648	BAG30.I3.d2	day2	BAG3_30	30	BAG3	BAG3	2	KO	BAG3_KO_day2	B	BMP	BTAG	Y
sample 152	152	MS188Y105	GATA3 KO	GATA3 KO, clone_40; day2, MS188Y105	day2, from 585B1 hiPSC BTAG reporter line	day2	Blimp1-tdTomato, TFAP2C-EGFP	Transcriptome of amplified cDNA from PGCLC induction of GATA3 KO series, clone 40, harvested at day2, BTAG-sorted	MS188_105	YK_649	BAG40_I3_d2_649	BAG40.I3.d2	day2	BAG3_40	40	BAG3	BAG3	2	KO	BAG3_KO_day2	B	BMP	BTAG	Y
sample 154	154	MS192Y108	GATA3 KO	GATA3 KO, clone_17; day4, MS192Y108	day4, from 585B1 hiPSC BTAG reporter line	day4	Blimp1-tdTomato, TFAP2C-EGFP	Transcriptome of amplified cDNA from PGCLC induction of GATA3 KO series, clone 17, harvested at day4, BTAG-sorted	MS192_108	YK_651	BAG17_I3_d4_651	BAG17.I3.d4	day4	BAG3_17	17	BAG3	BAG3	2	KO	BAG3_KO_day4	B	BMP	BTAG	Y
sample 155	155	MS188Y108	GATA3 KO	GATA3 KO, clone_18; day4, MS188Y108	day4, from 585B1 hiPSC BTAG reporter line	day4	Blimp1-tdTomato, TFAP2C-EGFP	Transcriptome of amplified cDNA from PGCLC induction of GATA3 KO series, clone 18, harvested at day4, BTAG-sorted	MS188_108	YK_652	BAG18_I3_d4_652	BAG18.I3.d4	day4	BAG3_18	18	BAG3	BAG3	2	KO	BAG3_KO_day4	B	BMP	BTAG	Y
sample 156	156	MS192Y109	GATA3 KO	GATA3 KO, clone_30; day4, MS192Y109	day4, from 585B1 hiPSC BTAG reporter line	day4	Blimp1-tdTomato, TFAP2C-EGFP	Transcriptome of amplified cDNA from PGCLC induction of GATA3 KO series, clone 30, harvested at day4, BTAG-sorted	MS192_109	YK_653	BAG30_I3_d4_653	BAG30.I3.d4	day4	BAG3_30	30	BAG3	BAG3	2	KO	BAG3_KO_day4	B	BMP	BTAG	Y
sample 157	157	MS188Y110	GATA3 KO	GATA3 KO, clone_40; day4, MS188Y110	day4, from 585B1 hiPSC BTAG reporter line	day4	Blimp1-tdTomato, TFAP2C-EGFP	Transcriptome of amplified cDNA from PGCLC induction of GATA3 KO series, clone 40, harvested at day4, BTAG-sorted	MS188_110	YK_654	BAG40_I3_d4_654	BAG40.I3.d4	day4	BAG3_40	40	BAG3	BAG3	2	KO	BAG3_KO_day4	B	BMP	BTAG	Y
sample 159	159	MS188Y112	GATA3 KO	GATA3 KO, clone_17; day6, MS188Y112	day6, from 585B1 hiPSC BTAG reporter line	day6	Blimp1-tdTomato, TFAP2C-EGFP	Transcriptome of amplified cDNA from PGCLC induction of GATA3 KO series, clone 17, harvested at day6, BTAG-sorted	MS188_112	YK_656	BAG17_I3_d6_656	BAG17.I3.d6	day6	BAG3_17	17	BAG3	BAG3	2	KO	BAG3_KO_day6	B	BMP	BTAG	Y
sample 160	160	MS188Y113	GATA3 KO	GATA3 KO, clone_18; day6, MS188Y113	day6, from 585B1 hiPSC BTAG reporter line	day6	Blimp1-tdTomato, TFAP2C-EGFP	Transcriptome of amplified cDNA from PGCLC induction of GATA3 KO series, clone 18, harvested at day6, BTAG-sorted	MS188_113	YK_657	BAG18_I3_d6_657	BAG18.I3.d6	day6	BAG3_18	18	BAG3	BAG3	2	KO	BAG3_KO_day6	B	BMP	BTAG	Y
sample 161	161	MS190Y114	GATA3 KO	GATA3 KO, clone_30; day6, MS190Y114	day6, from 585B1 hiPSC BTAG reporter line	day6	Blimp1-tdTomato, TFAP2C-EGFP	Transcriptome of amplified cDNA from PGCLC induction of GATA3 KO series, clone 30, harvested at day6, BTAG-sorted	MS190_114	YK_658	BAG30_I3_d6_658	BAG30.I3.d6	day6	BAG3_30	30	BAG3	BAG3	2	KO	BAG3_KO_day6	B	BMP	BTAG	Y
sample 162	162	MS190Y115	GATA3 KO	GATA3 KO, clone_40; day6, MS190Y115	day6, from 585B1 hiPSC BTAG reporter line	day6	Blimp1-tdTomato, TFAP2C-EGFP	Transcriptome of amplified cDNA from PGCLC induction of GATA3 KO series, clone 40, harvested at day6, BTAG-sorted	MS190_115	YK_659	BAG40_I3_d6_659	BAG40.I3.d6	day6	BAG3_40	40	BAG3	BAG3	2	KO	BAG3_KO_day6	B	BMP	BTAG	Y
sample 164	164	MS188Y117	GATA3 KO	GATA3 KO, clone_17; day2, MS188Y117	day2, from 585B1 hiPSC BTAG reporter line	day2	Blimp1-tdTomato, TFAP2C-EGFP	Transcriptome of amplified cDNA from PGCLC induction of GATA3 KO series, clone 17, harvested at day2, BTAG-sorted	MS188_117	YK_661	BAG17_I4_d2_661	BAG17.I4.d2	day2	BAG3_17	17	BAG3	BAG3	3	KO	BAG3_KO_day2	B	BMP	BTAG	Y
sample 165	165	MS188Y118	GATA3 KO	GATA3 KO, clone_18; day2, MS188Y118	day2, from 585B1 hiPSC BTAG reporter line	day2	Blimp1-tdTomato, TFAP2C-EGFP	Transcriptome of amplified cDNA from PGCLC induction of GATA3 KO series, clone 18, harvested at day2, BTAG-sorted	MS188_118	YK_662	BAG18_I4_d2_662	BAG18.I4.d2	day2	BAG3_18	18	BAG3	BAG3	3	KO	BAG3_KO_day2	B	BMP	BTAG	Y
sample 166	166	MS188Y119	GATA3 KO	GATA3 KO, clone_30; day2, MS188Y119	day2, from 585B1 hiPSC BTAG reporter line	day2	Blimp1-tdTomato, TFAP2C-EGFP	Transcriptome of amplified cDNA from PGCLC induction of GATA3 KO series, clone 30, harvested at day2, BTAG-sorted	MS188_119	YK_663	BAG30_I4_d2_663	BAG30.I4.d2	day2	BAG3_30	30	BAG3	BAG3	3	KO	BAG3_KO_day2	B	BMP	BTAG	Y
sample 167	167	MS188Y120	GATA3 KO	GATA3 KO, clone_40; day2, MS188Y120	day2, from 585B1 hiPSC BTAG reporter line	day2	Blimp1-tdTomato, TFAP2C-EGFP	Transcriptome of amplified cDNA from PGCLC induction of GATA3 KO series, clone 40, harvested at day2, BTAG-sorted	MS188_120	YK_664	BAG40_I4_d2_664	BAG40.I4.d2	day2	BAG3_40	40	BAG3	BAG3	3	KO	BAG3_KO_day2	B	BMP	BTAG	Y
sample 169	169	MS188Y122	GATA3 KO	GATA3 KO, clone_17; day4, MS188Y122	day4, from 585B1 hiPSC BTAG reporter line	day4	Blimp1-tdTomato, TFAP2C-EGFP	Transcriptome of amplified cDNA from PGCLC induction of GATA3 KO series, clone 17, harvested at day4, BTAG-sorted	MS188_122	YK_666	BAG17_I4_d4_666	BAG17.I4.d4	day4	BAG3_17	17	BAG3	BAG3	3	KO	BAG3_KO_day4	B	BMP	BTAG	Y
sample 170	170	MS188Y123	GATA3 KO	GATA3 KO, clone_18; day4, MS188Y123	day4, from 585B1 hiPSC BTAG reporter line	day4	Blimp1-tdTomato, TFAP2C-EGFP	Transcriptome of amplified cDNA from PGCLC induction of GATA3 KO series, clone 18, harvested at day4, BTAG-sorted	MS188_123	YK_667	BAG18_I4_d4_667	BAG18.I4.d4	day4	BAG3_18	18	BAG3	BAG3	3	KO	BAG3_KO_day4	B	BMP	BTAG	Y
sample 171	171	MS188Y124	GATA3 KO	GATA3 KO, clone_30; day4, MS188Y124	day4, from 585B1 hiPSC BTAG reporter line	day4	Blimp1-tdTomato, TFAP2C-EGFP	Transcriptome of amplified cDNA from PGCLC induction of GATA3 KO series, clone 30, harvested at day4, BTAG-sorted	MS188_124	YK_668	BAG30_I4_d4_668	BAG30.I4.d4	day4	BAG3_30	30	BAG3	BAG3	3	KO	BAG3_KO_day4	B	BMP	BTAG	Y
sample 172	172	MS188Y125	GATA3 KO	GATA3 KO, clone_40; day4, MS188Y125	day4, from 585B1 hiPSC BTAG reporter line	day4	Blimp1-tdTomato, TFAP2C-EGFP	Transcriptome of amplified cDNA from PGCLC induction of GATA3 KO series, clone 40, harvested at day4, BTAG-sorted	MS188_125	YK_669	BAG40_I4_d4_669	BAG40.I4.d4	day4	BAG3_40	40	BAG3	BAG3	3	KO	BAG3_KO_day4	B	BMP	BTAG	Y
sample 174	174	MS188Y127	GATA3 KO	GATA3 KO, clone_17; day6, MS188Y127	day6, from 585B1 hiPSC BTAG reporter line	day6	Blimp1-tdTomato, TFAP2C-EGFP	Transcriptome of amplified cDNA from PGCLC induction of GATA3 KO series, clone 17, harvested at day6, BTAG-sorted	MS188_127	YK_671	BAG17_I4_d6_671	BAG17.I4.d6	day6	BAG3_17	17	BAG3	BAG3	3	KO	BAG3_KO_day6	B	BMP	BTAG	Y
sample 175	175	MS188Y128	GATA3 KO	GATA3 KO, clone_18; day6, MS188Y128	day6, from 585B1 hiPSC BTAG reporter line	day6	Blimp1-tdTomato, TFAP2C-EGFP	Transcriptome of amplified cDNA from PGCLC induction of GATA3 KO series, clone 18, harvested at day6, BTAG-sorted	MS188_128	YK_672	BAG18_I4_d6_672	BAG18.I4.d6	day6	BAG3_18	18	BAG3	BAG3	3	KO	BAG3_KO_day6	B	BMP	BTAG	Y
sample 176	176	MS188Y129	GATA3 KO	GATA3 KO, clone_30; day6, MS188Y129	day6, from 585B1 hiPSC BTAG reporter line	day6	Blimp1-tdTomato, TFAP2C-EGFP	Transcriptome of amplified cDNA from PGCLC induction of GATA3 KO series, clone 30, harvested at day6, BTAG-sorted	MS188_129	YK_673	BAG30_I4_d6_673	BAG30.I4.d6	day6	BAG3_30	30	BAG3	BAG3	3	KO	BAG3_KO_day6	B	BMP	BTAG	Y
sample 177	177	MS188Y130	GATA3 KO	GATA3 KO, clone_40; day6, MS188Y130	day6, from 585B1 hiPSC BTAG reporter line	day6	Blimp1-tdTomato, TFAP2C-EGFP	Transcriptome of amplified cDNA from PGCLC induction of GATA3 KO series, clone 40, harvested at day6, BTAG-sorted	MS188_130	YK_674	BAG40_I4_d6_674	BAG40.I4.d6	day6	BAG3_40	40	BAG3	BAG3	3	KO	BAG3_KO_day6	B	BMP	BTAG	Y
sample 92	92	MS168Y9	Ctrl of GATA2/3 KO	Ctrl of GATA2/3 KO, clone_BTAG; iMeLC, MS168Y9	iMeLC, from 585B1 hiPSC BTAG reporter line	iMeLC	Blimp1-tdTomato, TFAP2C-EGFP	Transcriptome of amplified cDNA from PGCLC induction of Ctrl of GATA2/3 KO series, clone BTAG, harvested at iMeLC, non-sorted	MS168_9	YK_580	BTAG_I2_iM_580	BTAG.I2.iM	iMeLC	BTAG	BTAG	BAG3	BTAG	2	WT	BTAG_WT_iMeLC			non
sample 102	102	MS168Y19	Ctrl of GATA2/3 KO	Ctrl of GATA2/3 KO, clone_BTAG; day2, MS168Y19	day2, from 585B1 hiPSC BTAG reporter line	day2	Blimp1-tdTomato, TFAP2C-EGFP	Transcriptome of amplified cDNA from PGCLC induction of Ctrl of GATA2/3 KO series, clone BTAG, harvested at day2, BTAG-sorted	MS168_19	YK_590	BTAG_I2_d2_590	BTAG.I2.d2	day2	BTAG	BTAG	BAG3	BTAG	2	WT	BTAG_WT_day2	B	BMP	BTAG	Y
sample 112	112	MS168Y29	Ctrl of GATA2/3 KO	Ctrl of GATA2/3 KO, clone_BTAG; day4, MS168Y29	day4, from 585B1 hiPSC BTAG reporter line	day4	Blimp1-tdTomato, TFAP2C-EGFP	Transcriptome of amplified cDNA from PGCLC induction of Ctrl of GATA2/3 KO series, clone BTAG, harvested at day4, BTAG-sorted	MS168_29	YK_600	BTAG_I2_d4_600	BTAG.I2.d4	day4	BTAG	BTAG	BAG3	BTAG	2	WT	BTAG_WT_day4	B	BMP	BTAG	Y
sample 153	153	MS188Y106	Ctrl of GATA2/3 KO	Ctrl of GATA2/3 KO, clone_BTAG; day2, MS188Y106	day2, from 585B1 hiPSC BTAG reporter line	day6	Blimp1-tdTomato, TFAP2C-EGFP	Transcriptome of amplified cDNA from PGCLC induction of Ctrl of GATA2/3 KO series, clone BTAG, harvested at day2, BTAG-sorted	MS188_106	YK_650	BTAG_I3_d2_650	BTAG.I3.d2	day2	BTAG	BTAG	BAG3	BTAG	2	WT	BTAG_WT_day2	B	BMP	BTAG	Y
sample 158	158	MS188Y111	Ctrl of GATA2/3 KO	Ctrl of GATA2/3 KO, clone_BTAG; day4, MS188Y111	day4, from 585B1 hiPSC BTAG reporter line	day2	Blimp1-tdTomato, TFAP2C-EGFP	Transcriptome of amplified cDNA from PGCLC induction of Ctrl of GATA2/3 KO series, clone BTAG, harvested at day4, BTAG-sorted	MS188_111	YK_655	BTAG_I3_d4_655	BTAG.I3.d4	day4	BTAG	BTAG	BAG3	BTAG	2	WT	BTAG_WT_day4	B	BMP	BTAG	Y
sample 163	163	MS188Y116	Ctrl of GATA2/3 KO	Ctrl of GATA2/3 KO, clone_BTAG; day6, MS188Y116	day6, from 585B1 hiPSC BTAG reporter line	day4	Blimp1-tdTomato, TFAP2C-EGFP	Transcriptome of amplified cDNA from PGCLC induction of Ctrl of GATA2/3 KO series, clone BTAG, harvested at day6, BTAG-sorted	MS188_116	YK_660	BTAG_I3_d6_660	BTAG.I3.d6	day6	BTAG	BTAG	BAG3	BTAG	2	WT	BTAG_WT_day6	B	BMP	BTAG	Y
sample 168	168	MS188Y121	Ctrl of GATA2/3 KO	Ctrl of GATA2/3 KO, clone_BTAG; day2, MS188Y121	day2, from 585B1 hiPSC BTAG reporter line	day6	Blimp1-tdTomato, TFAP2C-EGFP	Transcriptome of amplified cDNA from PGCLC induction of Ctrl of GATA2/3 KO series, clone BTAG, harvested at day2, BTAG-sorted	MS188_121	YK_665	BTAG_I4_d2_665	BTAG.I4.d2	day2	BTAG	BTAG	BAG3	BTAG	3	WT	BTAG_WT_day2	B	BMP	BTAG	Y
sample 173	173	MS188Y126	Ctrl of GATA2/3 KO	Ctrl of GATA2/3 KO, clone_BTAG; day4, MS188Y126	day4, from 585B1 hiPSC BTAG reporter line	day2	Blimp1-tdTomato, TFAP2C-EGFP	Transcriptome of amplified cDNA from PGCLC induction of Ctrl of GATA2/3 KO series, clone BTAG, harvested at day4, BTAG-sorted	MS188_126	YK_670	BTAG_I4_d4_670	BTAG.I4.d4	day4	BTAG	BTAG	BAG3	BTAG	3	WT	BTAG_WT_day4	B	BMP	BTAG	Y
sample 178	178	MS188Y131	Ctrl of GATA2/3 KO	Ctrl of GATA2/3 KO, clone_BTAG; day6, MS188Y131	day6, from 585B1 hiPSC BTAG reporter line	day4	Blimp1-tdTomato, TFAP2C-EGFP	Transcriptome of amplified cDNA from PGCLC induction of Ctrl of GATA2/3 KO series, clone BTAG, harvested at day6, BTAG-sorted	MS188_131	YK_675	BTAG_I4_d6_675	BTAG.I4.d6	day6	BTAG	BTAG	BAG3	BTAG	3	WT	BTAG_WT_day6	B	BMP	BTAG	Y
sample 138	138	MS188Y91	Ctrl of Dox-inducible SOX17, TFAP2C, GATA3	Ctrl of Dox-inducible SOX17, TFAP2C, GATA3, clone_BTAG; day6, MS188Y91	day6, from 585B1 hiPSC BTAG reporter line	day6	Blimp1-tdTomato, TFAP2C-EGFP	Transcriptome of amplified cDNA from PGCLC induction of Ctrl of Dox-inducible SOX17, TFAP2C, GATA3 series, clone BTAG, harvested at day6, BTAG-sorted	MS188_91	YK_630	BTAG_I6_d6_630	BTAG.I6.d6	day6	BTAG	BTAG	SAG3	BTAG	1	WT	BTAG_WT_day6	B	BMP	BTAG	Y
sample 183	183	MS192Y107	Ctrl of Dox-inducible SOX17, TFAP2C, GATA3	Ctrl of Dox-inducible SOX17, TFAP2C, GATA3, clone_BTAG; day77, MS192Y107	day77, from 585B1 hiPSC BTAG reporter line	day77	Blimp1-tdTomato, TFAP2C-EGFP	Transcriptome of amplified cDNA from PGCLC induction of Ctrl of Dox-inducible SOX17, TFAP2C, GATA3 series, clone BTAG, harvested at day77, BTAG-sorted	MS192_107	YK_713	BTAG re2 d77_713	BTAG.re2.d77	day77	BTAG	BTAG	SAG3	BTAG_r	2	WT_r	BTAG_r_day77	B	BMP	BTAG
sample 1	1	MS151Y081	Dox-inducible SOX17, TFAP2C	Dox-inducible SOX17, TFAP2C, clone_2; iPSC, MS151Y081	iPSC, from 585B1 hiPSC BTAG reporter line	iPSC	Blimp1-tdTomato, TFAP2C-EGFP	Transcriptome of amplified cDNA from PGCLC induction of Dox-inducible SOX17, TFAP2C series, clone 2, harvested at iPSC, non-sorted	MS151_081	YK_466	SA2_iPSC_I1_466	SA2.iPSC.I1	iPSC	SA2	2	SA	SA		SAOP	SA_iPSC			non
sample 2	2	MS151Y082	Dox-inducible SOX17, TFAP2C	Dox-inducible SOX17, TFAP2C, clone_11; iPSC, MS151Y082	iPSC, from 585B1 hiPSC BTAG reporter line	iPSC	Blimp1-tdTomato, TFAP2C-EGFP	Transcriptome of amplified cDNA from PGCLC induction of Dox-inducible SOX17, TFAP2C series, clone 11, harvested at iPSC, non-sorted	MS151_082	YK_467	SA11_iPSC_I1_467	SA11.iPSC.I1	iPSC	SA11	11	SA	SA		SAOP	SA_iPSC			non
sample 3	3	MS151Y083	Dox-inducible SOX17, TFAP2C	Dox-inducible SOX17, TFAP2C, clone_2; iMeLC, MS151Y083	iMeLC, from 585B1 hiPSC BTAG reporter line	iMeLC	Blimp1-tdTomato, TFAP2C-EGFP	Transcriptome of amplified cDNA from PGCLC induction of Dox-inducible SOX17, TFAP2C series, clone 2, harvested at iMeLC, non-sorted	MS151_083	YK_468	SA2_iM_I1_468	SA2.iM.I1	iMeLC	SA2	2	SA	SA		SAOP	SA_iMeLC			non
sample 4	4	MS151Y084	Dox-inducible SOX17, TFAP2C	Dox-inducible SOX17, TFAP2C, clone_11; iMeLC, MS151Y084	iMeLC, from 585B1 hiPSC BTAG reporter line	iMeLC	Blimp1-tdTomato, TFAP2C-EGFP	Transcriptome of amplified cDNA from PGCLC induction of Dox-inducible SOX17, TFAP2C series, clone 11, harvested at iMeLC, non-sorted	MS151_084	YK_469	SA11_iM_I1_469	SA11.iM.I1	iMeLC	SA11	11	SA	SA		SAOP	SA_iMeLC			non
sample 5	5	MS151Y085	Dox-inducible SOX17, TFAP2C	Dox-inducible SOX17, TFAP2C, clone_2; iMeLC, MS151Y085	iMeLC, from 585B1 hiPSC BTAG reporter line	iMeLC	Blimp1-tdTomato, TFAP2C-EGFP	Transcriptome of amplified cDNA from PGCLC induction of Dox-inducible SOX17, TFAP2C series, clone 2, harvested at iMeLC, non-sorted	MS151_085	YK_470	SA2_iM_I3_470	SA2.iM.I3	iMeLC	SA2	2	SA	SA		SAOP	SA_iMeLC			non
sample 6	6	MS151Y086	Dox-inducible SOX17, TFAP2C	Dox-inducible SOX17, TFAP2C, clone_11; iMeLC, MS151Y086	iMeLC, from 585B1 hiPSC BTAG reporter line	iMeLC	Blimp1-tdTomato, TFAP2C-EGFP	Transcriptome of amplified cDNA from PGCLC induction of Dox-inducible SOX17, TFAP2C series, clone 11, harvested at iMeLC, non-sorted	MS151_086	YK_471	SA11_iM_I3_471	SA11.iM.I3	iMeLC	SA11	11	SA	SA		SAOP	SA_iMeLC			non
sample 7	7	MS151Y087	Dox-inducible SOX17, TFAP2C	Dox-inducible SOX17, TFAP2C, clone_2; day2, MS151Y087	day2, from 585B1 hiPSC BTAG reporter line	day2	Blimp1-tdTomato, TFAP2C-EGFP	Transcriptome of amplified cDNA from PGCLC induction of Dox-inducible SOX17, TFAP2C series, clone 2, harvested at day2, BT-sorted	MS151_087	YK_472	SA2_I2_d2_D_472	SA2.I2.d2.D	day2	SA2	2	SA	SA		SAOP	SA_day2_D	D	Dox	BT
sample 8	8	MS151Y088	Dox-inducible SOX17, TFAP2C	Dox-inducible SOX17, TFAP2C, clone_2; day2, MS151Y088	day2, from 585B1 hiPSC BTAG reporter line	day2	Blimp1-tdTomato, TFAP2C-EGFP	Transcriptome of amplified cDNA from PGCLC induction of Dox-inducible SOX17, TFAP2C series, clone 2, harvested at day2, BTAG-sorted	MS151_088	YK_473	SA2_I2_d2_BD_473	SA2.I2.d2.BD	day2	SA2	2	SA	SA		SAOP	SA_day2_BD	BD	BMP+Dox	BTAG	Y
sample 9	9	MS151Y089	Dox-inducible SOX17, TFAP2C	Dox-inducible SOX17, TFAP2C, clone_11; day2, MS151Y089	day2, from 585B1 hiPSC BTAG reporter line	day2	Blimp1-tdTomato, TFAP2C-EGFP	Transcriptome of amplified cDNA from PGCLC induction of Dox-inducible SOX17, TFAP2C series, clone 11, harvested at day2, BT-sorted	MS151_089	YK_474	SA11_I2_d2_D_474	SA11.I2.d2.D	day2	SA11	11	SA	SA		SAOP	SA_day2_D	D	Dox	BT
sample 10	10	MS151Y090	Dox-inducible SOX17, TFAP2C	Dox-inducible SOX17, TFAP2C, clone_11; day2, MS151Y090	day2, from 585B1 hiPSC BTAG reporter line	day2	Blimp1-tdTomato, TFAP2C-EGFP	Transcriptome of amplified cDNA from PGCLC induction of Dox-inducible SOX17, TFAP2C series, clone 11, harvested at day2, BTAG-sorted	MS151_090	YK_475	SA11_I2_d2_BD_475	SA11.I2.d2.BD	day2	SA11	11	SA	SA		SAOP	SA_day2_BD	BD	BMP+Dox	BTAG	Y
sample 11	11	MS151Y091	Dox-inducible SOX17, TFAP2C	Dox-inducible SOX17, TFAP2C, clone_2; day2, MS151Y091	day2, from 585B1 hiPSC BTAG reporter line	day2	Blimp1-tdTomato, TFAP2C-EGFP	Transcriptome of amplified cDNA from PGCLC induction of Dox-inducible SOX17, TFAP2C series, clone 2, harvested at day2, BT-sorted	MS151_091	YK_476	SA2_I3_d2_D_476	SA2.I3.d2.D	day2	SA2	2	SA	SA		SAOP	SA_day2_D	D	Dox	BT
sample 12	12	MS151Y092	Dox-inducible SOX17, TFAP2C	Dox-inducible SOX17, TFAP2C, clone_11; day2, MS151Y092	day2, from 585B1 hiPSC BTAG reporter line	day2	Blimp1-tdTomato, TFAP2C-EGFP	Transcriptome of amplified cDNA from PGCLC induction of Dox-inducible SOX17, TFAP2C series, clone 11, harvested at day2, BT-sorted	MS151_092	YK_477	SA11_I3_d2_D_477	SA11.I3.d2.D	day2	SA11	11	SA	SA		SAOP	SA_day2_D	D	Dox	BT
sample 13	13	MS151Y093	Dox-inducible SOX17, TFAP2C	Dox-inducible SOX17, TFAP2C, clone_2; day2, MS151Y093	day2, from 585B1 hiPSC BTAG reporter line	day2	Blimp1-tdTomato, TFAP2C-EGFP	Transcriptome of amplified cDNA from PGCLC induction of Dox-inducible SOX17, TFAP2C series, clone 2, harvested at day2, BT-sorted	MS151_093	YK_478	SA2_I4_d2_D_478	SA2.I4.d2.D	day2	SA2	2	SA	SA		SAOP	SA_day2_D	D	Dox	BT
sample 14	14	MS151Y094	Dox-inducible SOX17, TFAP2C	Dox-inducible SOX17, TFAP2C, clone_11; day2, MS151Y094	day2, from 585B1 hiPSC BTAG reporter line	day2	Blimp1-tdTomato, TFAP2C-EGFP	Transcriptome of amplified cDNA from PGCLC induction of Dox-inducible SOX17, TFAP2C series, clone 11, harvested at day2, BT-sorted	MS151_094	YK_480	SA11_I4_d2_D_480	SA11.I4.d2.D	day2	SA11	11	SA	SA		SAOP	SA_day2_D	D	Dox	BT
sample 78	78	MS155Y57	Dox-inducible SOX17, TFAP2C	Dox-inducible SOX17, TFAP2C, clone_2; iMeLC, MS155Y57	iMeLC, from 585B1 hiPSC BTAG reporter line	iMeLC	Blimp1-tdTomato, TFAP2C-EGFP	Transcriptome of amplified cDNA from PGCLC induction of Dox-inducible SOX17, TFAP2C series, clone 2, harvested at iMeLC, BT-sorted	MS155_57	YK_563	SA2_I4_iM_563	SA2.I4.iM	iMeLC	SA2	2	SA	SA		SAOP	SA_iMeLC			BT
sample 79	79	MS155Y58	Dox-inducible SOX17, TFAP2C	Dox-inducible SOX17, TFAP2C, clone_28; iMeLC, MS155Y58	iMeLC, from 585B1 hiPSC BTAG reporter line	iMeLC	Blimp1-tdTomato, TFAP2C-EGFP	Transcriptome of amplified cDNA from PGCLC induction of Dox-inducible SOX17, TFAP2C series, clone 28, harvested at iMeLC, BT-sorted	MS155_58	YK_564	SA28_I4_iM_564	SA28.I4.iM	iMeLC	SA28	28	SA	SA		SAOP	SA_iMeLC			BT
sample 80	80	MS155Y59	Dox-inducible SOX17, TFAP2C	Dox-inducible SOX17, TFAP2C, clone_2; day1, MS155Y59	day1, from 585B1 hiPSC BTAG reporter line	day1	Blimp1-tdTomato, TFAP2C-EGFP	Transcriptome of amplified cDNA from PGCLC induction of Dox-inducible SOX17, TFAP2C series, clone 2, harvested at day1, BT-sorted	MS155_59	YK_565	SA2_I4_d1_565	SA2.I4.d1	day1	SA2	2	SA	SA		SAOP	SA_day1_D	D	Dox	BT
sample 81	81	MS155Y60	Dox-inducible SOX17, TFAP2C	Dox-inducible SOX17, TFAP2C, clone_28; day1, MS155Y60	day1, from 585B1 hiPSC BTAG reporter line	day1	Blimp1-tdTomato, TFAP2C-EGFP	Transcriptome of amplified cDNA from PGCLC induction of Dox-inducible SOX17, TFAP2C series, clone 28, harvested at day1, BT-sorted	MS155_60	YK_566	SA28_I4_d1_566	SA28.I4.d1	day1	SA28	28	SA	SA		SAOP	SA_day1_D	D	Dox	BT
sample 82	82	MS155Y61	Dox-inducible SOX17, TFAP2C	Dox-inducible SOX17, TFAP2C, clone_2; day2, MS155Y61	day2, from 585B1 hiPSC BTAG reporter line	day2	Blimp1-tdTomato, TFAP2C-EGFP	Transcriptome of amplified cDNA from PGCLC induction of Dox-inducible SOX17, TFAP2C series, clone 2, harvested at day2, BT-sorted	MS155_61	YK_567	SA2_I4_d2_567	SA2.I4.d2	day2	SA2	2	SA	SA		SAOP	SA_day2_D	D	Dox	BT
sample 83	83	MS155Y62	Dox-inducible SOX17, TFAP2C	Dox-inducible SOX17, TFAP2C, clone_28; day2, MS155Y62	day2, from 585B1 hiPSC BTAG reporter line	day2	Blimp1-tdTomato, TFAP2C-EGFP	Transcriptome of amplified cDNA from PGCLC induction of Dox-inducible SOX17, TFAP2C series, clone 28, harvested at day2, BT-sorted	MS155_62	YK_568	SA28_I4_d2_568	SA28.I4.d2	day2	SA28	28	SA	SA		SAOP	SA_day2_D	D	Dox	BT
sample 16	16	MS151Y096	Dox-inducible SOX17, TFAP2C, BLIMP1	Dox-inducible SOX17, TFAP2C, BLIMP1, clone_4; iPSC, MS151Y096	iPSC, from 585B1 hiPSC BTAG reporter line	iPSC	Blimp1-tdTomato, TFAP2C-EGFP	Transcriptome of amplified cDNA from PGCLC induction of Dox-inducible SOX17, TFAP2C, BLIMP1 series, clone 4, harvested at iPSC, non-sorted	MS151_096	YK_482	SAB4_iPSC_I3_482	SAB4.iPSC.I3	iPSC	SAB4	4	SAB	SAB		SABOP	SAB_iPSC			non
sample 19	19	MS151Y099	Dox-inducible SOX17, TFAP2C, BLIMP1	Dox-inducible SOX17, TFAP2C, BLIMP1, clone_4; day2, MS151Y099	day2, from 585B1 hiPSC BTAG reporter line	day2	Blimp1-tdTomato, TFAP2C-EGFP	Transcriptome of amplified cDNA from PGCLC induction of Dox-inducible SOX17, TFAP2C, BLIMP1 series, clone 4, harvested at day2, BT-sorted	MS151_099	YK_485	SAB4_D_d2_BT_I3_485	SAB4.D.d2.BT.I3	day2	SAB4	4	SAB	SAB		SABOP	SAB_day2_D	D	Dox	BT
sample 22	22	MS151Y102	Dox-inducible SOX17, TFAP2C, BLIMP1	Dox-inducible SOX17, TFAP2C, BLIMP1, clone_4; day4, MS151Y102	day4, from 585B1 hiPSC BTAG reporter line	day4	Blimp1-tdTomato, TFAP2C-EGFP	Transcriptome of amplified cDNA from PGCLC induction of Dox-inducible SOX17, TFAP2C, BLIMP1 series, clone 4, harvested at day4, BT-sorted	MS151_102	YK_488	SAB4_D_d4_BT_I3_488	SAB4.D.d4.BT.I3	day4	SAB4	4	SAB	SAB		SABOP	SAB_day4_D	D	Dox	BT
sample 23	23	MS151Y103	Dox-inducible SOX17, TFAP2C, BLIMP1	Dox-inducible SOX17, TFAP2C, BLIMP1, clone_4; day4, MS151Y103	day4, from 585B1 hiPSC BTAG reporter line	day4	Blimp1-tdTomato, TFAP2C-EGFP	Transcriptome of amplified cDNA from PGCLC induction of Dox-inducible SOX17, TFAP2C, BLIMP1 series, clone 4, harvested at day4, BTAG-sorted	MS151_103	YK_489	SAB4_D_d4_BTAG_I4_489	SAB4.D.d4.BTAG.I4	day4	SAB4	4	SAB	SAB		SABOP	SAB_day4_D	D	Dox	BTAG	Y
sample 24	24	MS151Y104	Dox-inducible SOX17, TFAP2C, BLIMP1	Dox-inducible SOX17, TFAP2C, BLIMP1, clone_4; day4, MS151Y104	day4, from 585B1 hiPSC BTAG reporter line	day4	Blimp1-tdTomato, TFAP2C-EGFP	Transcriptome of amplified cDNA from PGCLC induction of Dox-inducible SOX17, TFAP2C, BLIMP1 series, clone 4, harvested at day4, BT-sorted	MS151_104	YK_490	SAB4_D_d4_BT_I4_490	SAB4.D.d4.BT.I4	day4	SAB4	4	SAB	SAB		SABOP	SAB_day4_D	D	Dox	BT
sample 25	25	MS151Y105	Dox-inducible SOX17, TFAP2C, BLIMP1	Dox-inducible SOX17, TFAP2C, BLIMP1, clone_4; day4, MS151Y105	day4, from 585B1 hiPSC BTAG reporter line	day4	Blimp1-tdTomato, TFAP2C-EGFP	Transcriptome of amplified cDNA from PGCLC induction of Dox-inducible SOX17, TFAP2C, BLIMP1 series, clone 4, harvested at day4, AG-sorted	MS151_105	YK_491	SAB4_D_d4_AG_I4_491	SAB4.D.d4.AG.I4	day4	SAB4	4	SAB	SAB		SABOP	SAB_day4_D	D	Dox	AG
sample 26	26	MS151Y106	Dox-inducible SOX17, TFAP2C, BLIMP1	Dox-inducible SOX17, TFAP2C, BLIMP1, clone_4; day4, MS151Y106	day4, from 585B1 hiPSC BTAG reporter line	day4	Blimp1-tdTomato, TFAP2C-EGFP	Transcriptome of amplified cDNA from PGCLC induction of Dox-inducible SOX17, TFAP2C, BLIMP1 series, clone 4, harvested at day4, BTAGneg-sorted	MS151_106	YK_492	SAB4_D_d4_N_I4_492	SAB4.D.d4.N.I4	day4	SAB4	4	SAB	SAB		SABOP	SAB_day4_D	D	Dox	BTAGneg
sample 28	28	MS151Y108	Dox-inducible SOX17, TFAP2C, BLIMP1	Dox-inducible SOX17, TFAP2C, BLIMP1, clone_4; iPSC, MS151Y108	iPSC, from 585B1 hiPSC BTAG reporter line	iPSC	Blimp1-tdTomato, TFAP2C-EGFP	Transcriptome of amplified cDNA from PGCLC induction of Dox-inducible SOX17, TFAP2C, BLIMP1 series, clone 4, harvested at iPSC, non-sorted	MS151_108	YK_494	SAB4_iPSC_I5_494	SAB4.iPSC.I5	iPSC	SAB4	4	SAB	SAB		SABOP	SAB_iPSC			non
sample 31	31	MS151Y111	Dox-inducible SOX17, TFAP2C, BLIMP1	Dox-inducible SOX17, TFAP2C, BLIMP1, clone_4; iMeLC, MS151Y111	iMeLC, from 585B1 hiPSC BTAG reporter line	iMeLC	Blimp1-tdTomato, TFAP2C-EGFP	Transcriptome of amplified cDNA from PGCLC induction of Dox-inducible SOX17, TFAP2C, BLIMP1 series, clone 4, harvested at iMeLC, non-sorted	MS151_111	YK_497	SAB4_iM_I5_497	SAB4.iM.I5	iMeLC	SAB4	4	SAB	SAB		SABOP	SAB_iMeLC			non
sample 34	34	MS151Y114	Dox-inducible SOX17, TFAP2C, BLIMP1	Dox-inducible SOX17, TFAP2C, BLIMP1, clone_4; day1, MS151Y114	day1, from 585B1 hiPSC BTAG reporter line	day1	Blimp1-tdTomato, TFAP2C-EGFP	Transcriptome of amplified cDNA from PGCLC induction of Dox-inducible SOX17, TFAP2C, BLIMP1 series, clone 4, harvested at day1, non-sorted	MS151_114	YK_500	SAB4_d1_D_I5_500	SAB4.d1.D.I5	day1	SAB4	4	SAB	SAB		SABOP	SAB_day1_D	D	Dox	non
sample 37	37	MS151Y117	Dox-inducible SOX17, TFAP2C, BLIMP1	Dox-inducible SOX17, TFAP2C, BLIMP1, clone_4; day2, MS151Y117	day2, from 585B1 hiPSC BTAG reporter line	day2	Blimp1-tdTomato, TFAP2C-EGFP	Transcriptome of amplified cDNA from PGCLC induction of Dox-inducible SOX17, TFAP2C, BLIMP1 series, clone 4, harvested at day2, BT-sorted	MS151_117	YK_503	SAB4_D_d2_BT_I5_503	SAB4.D.d2.BT.I5	day2	SAB4	4	SAB	SAB		SABOP	SAB_day2_D	D	Dox	BT
sample 40	40	MS151Y120	Dox-inducible SOX17, TFAP2C, BLIMP1	Dox-inducible SOX17, TFAP2C, BLIMP1, clone_4; day4, MS151Y120	day4, from 585B1 hiPSC BTAG reporter line	day4	Blimp1-tdTomato, TFAP2C-EGFP	Transcriptome of amplified cDNA from PGCLC induction of Dox-inducible SOX17, TFAP2C, BLIMP1 series, clone 4, harvested at day4, BT-sorted	MS151_120	YK_506	SAB4_D_d4_BT_I5_506	SAB4.D.d4.BT.I5	day4	SAB4	4	SAB	SAB		SABOP	SAB_day4_D	D	Dox	BT
sample 41	41	MS151Y121	Dox-inducible SOX17, TFAP2C, BLIMP1	Dox-inducible SOX17, TFAP2C, BLIMP1, clone_4; day4, MS151Y121	day4, from 585B1 hiPSC BTAG reporter line	day4	Blimp1-tdTomato, TFAP2C-EGFP	Transcriptome of amplified cDNA from PGCLC induction of Dox-inducible SOX17, TFAP2C, BLIMP1 series, clone 4, harvested at day4, BTAG-sorted	MS151_121	YK_507	SAB4_D_d4_BTAG_I5_507	SAB4.D.d4.BTAG.I5	day4	SAB4	4	SAB	SAB		SABOP	SAB_day4_D	D	Dox	BTAG	Y
sample 44	44	MS151Y124	Dox-inducible SOX17, TFAP2C, BLIMP1	Dox-inducible SOX17, TFAP2C, BLIMP1, clone_4; iMeLC, MS151Y124	iMeLC, from 585B1 hiPSC BTAG reporter line	iMeLC	Blimp1-tdTomato, TFAP2C-EGFP	Transcriptome of amplified cDNA from PGCLC induction of Dox-inducible SOX17, TFAP2C, BLIMP1 series, clone 4, harvested at iMeLC, non-sorted	MS151_124	YK_510	SAB4_iM_I6_510	SAB4.iM.I6	iMeLC	SAB4	4	SAB	SAB		SABOP	SAB_iMeLC			non
sample 47	47	MS151Y127	Dox-inducible SOX17, TFAP2C, BLIMP1	Dox-inducible SOX17, TFAP2C, BLIMP1, clone_4; day1, MS151Y127	day1, from 585B1 hiPSC BTAG reporter line	day1	Blimp1-tdTomato, TFAP2C-EGFP	Transcriptome of amplified cDNA from PGCLC induction of Dox-inducible SOX17, TFAP2C, BLIMP1 series, clone 4, harvested at day1, non-sorted	MS151_127	YK_513	SAB4_d1_D_I6_513	SAB4.d1.D.I6	day1	SAB4	4	SAB	SAB		SABOP	SAB_day1_D	D	Dox	non
sample 50	50	MS152Y50	Dox-inducible SOX17, TFAP2C, BLIMP1	Dox-inducible SOX17, TFAP2C, BLIMP1, clone_4; day2, MS152Y50	day2, from 585B1 hiPSC BTAG reporter line	day2	Blimp1-tdTomato, TFAP2C-EGFP	Transcriptome of amplified cDNA from PGCLC induction of Dox-inducible SOX17, TFAP2C, BLIMP1 series, clone 4, harvested at day2, BT-sorted	MS152_50	YK_516	SAB4_D_d2_BT_I6_516	SAB4.D.d2.BT.I6	day2	SAB4	4	SAB	SAB		SABOP	SAB_day2_D	D	Dox	BT
sample 53	53	MS152Y54	Dox-inducible SOX17, TFAP2C, BLIMP1	Dox-inducible SOX17, TFAP2C, BLIMP1, clone_4; day4, MS152Y54	day4, from 585B1 hiPSC BTAG reporter line	day4	Blimp1-tdTomato, TFAP2C-EGFP	Transcriptome of amplified cDNA from PGCLC induction of Dox-inducible SOX17, TFAP2C, BLIMP1 series, clone 4, harvested at day4, BTAG-sorted	MS152_54	YK_520	SAB4_D_d4_BTAG_I3_520	SAB4.D.d4.BTAG.I3	day4	SAB4	4	SAB	SAB		SABOP	SAB_day4_D	D	Dox	BTAG	Y
sample 54	54	MS152Y55	Dox-inducible SOX17, TFAP2C, BLIMP1	Dox-inducible SOX17, TFAP2C, BLIMP1, clone_22; iMeLC, MS152Y55	iMeLC, from 585B1 hiPSC BTAG reporter line	iMeLC	Blimp1-tdTomato, TFAP2C-EGFP	Transcriptome of amplified cDNA from PGCLC induction of Dox-inducible SOX17, TFAP2C, BLIMP1 series, clone 22, harvested at iMeLC, non-sorted	MS152_55	YK_521	SAB22_iM_I1_521	SAB22.iM.I1	iMeLC	SAB22	22	SAB	SAB		SABOP	SAB_iMeLC			non
sample 55	55	MS152Y56	Dox-inducible SOX17, TFAP2C, BLIMP1	Dox-inducible SOX17, TFAP2C, BLIMP1, clone_28; iMeLC, MS152Y56	iMeLC, from 585B1 hiPSC BTAG reporter line	iMeLC	Blimp1-tdTomato, TFAP2C-EGFP	Transcriptome of amplified cDNA from PGCLC induction of Dox-inducible SOX17, TFAP2C, BLIMP1 series, clone 28, harvested at iMeLC, non-sorted	MS152_56	YK_522	SAB28_iM_I1_522	SAB28.iM.I1	iMeLC	SAB28	28	SAB	SAB		SABOP	SAB_iMeLC			non
sample 56	56	MS152Y57	Dox-inducible SOX17, TFAP2C, BLIMP1	Dox-inducible SOX17, TFAP2C, BLIMP1, clone_22; day1, MS152Y57	day1, from 585B1 hiPSC BTAG reporter line	day1	Blimp1-tdTomato, TFAP2C-EGFP	Transcriptome of amplified cDNA from PGCLC induction of Dox-inducible SOX17, TFAP2C, BLIMP1 series, clone 22, harvested at day1, non-sorted	MS152_57	YK_523	SAB22_d1_D_I2_523	SAB22.d1.D.I2	day1	SAB22	22	SAB	SAB		SABOP	SAB_day1_D	D	Dox	non
sample 57	57	MS152Y58	Dox-inducible SOX17, TFAP2C, BLIMP1	Dox-inducible SOX17, TFAP2C, BLIMP1, clone_28; day1, MS152Y58	day1, from 585B1 hiPSC BTAG reporter line	day1	Blimp1-tdTomato, TFAP2C-EGFP	Transcriptome of amplified cDNA from PGCLC induction of Dox-inducible SOX17, TFAP2C, BLIMP1 series, clone 28, harvested at day1, non-sorted	MS152_58	YK_524	SAB28_d1_D_I2_524	SAB28.d1.D.I2	day1	SAB28	28	SAB	SAB		SABOP	SAB_day1_D	D	Dox	non
sample 58	58	MS152Y59	Dox-inducible SOX17, TFAP2C, BLIMP1	Dox-inducible SOX17, TFAP2C, BLIMP1, clone_22; day4, MS152Y59	day4, from 585B1 hiPSC BTAG reporter line	day4	Blimp1-tdTomato, TFAP2C-EGFP	Transcriptome of amplified cDNA from PGCLC induction of Dox-inducible SOX17, TFAP2C, BLIMP1 series, clone 22, harvested at day4, BT-sorted	MS152_59	YK_525	SAB22_d4_D_BT_I3_525	SAB22.d4.D.BT.I3	day4	SAB22	22	SAB	SAB		SABOP	SAB_day4_D	D	Dox	BT
sample 59	59	MS152Y60	Dox-inducible SOX17, TFAP2C, BLIMP1	Dox-inducible SOX17, TFAP2C, BLIMP1, clone_22; day4, MS152Y60	day4, from 585B1 hiPSC BTAG reporter line	day4	Blimp1-tdTomato, TFAP2C-EGFP	Transcriptome of amplified cDNA from PGCLC induction of Dox-inducible SOX17, TFAP2C, BLIMP1 series, clone 22, harvested at day4, BTAG-sorted	MS152_60	YK_526	SAB22_d4_D_BTAG_I3_526	SAB22.d4.D.BTAG.I3	day4	SAB22	22	SAB	SAB		SABOP	SAB_day4_D	D	Dox	BTAG	Y
sample 60	60	MS152Y61	Dox-inducible SOX17, TFAP2C, BLIMP1	Dox-inducible SOX17, TFAP2C, BLIMP1, clone_28; day4, MS152Y61	day4, from 585B1 hiPSC BTAG reporter line	day4	Blimp1-tdTomato, TFAP2C-EGFP	Transcriptome of amplified cDNA from PGCLC induction of Dox-inducible SOX17, TFAP2C, BLIMP1 series, clone 28, harvested at day4, BT-sorted	MS152_61	YK_527	SAB28_d4_D_BT_I3_527	SAB28.d4.D.BT.I3	day4	SAB28	28	SAB	SAB		SABOP	SAB_day4_D	D	Dox	BT
sample 61	61	MS152Y62	Dox-inducible SOX17, TFAP2C, BLIMP1	Dox-inducible SOX17, TFAP2C, BLIMP1, clone_28; day4, MS152Y62	day4, from 585B1 hiPSC BTAG reporter line	day4	Blimp1-tdTomato, TFAP2C-EGFP	Transcriptome of amplified cDNA from PGCLC induction of Dox-inducible SOX17, TFAP2C, BLIMP1 series, clone 28, harvested at day4, BTAG-sorted	MS152_62	YK_528	SAB28_d4_D_BTAG_I3_528	SAB28.d4.D.BTAG.I3	day4	SAB28	28	SAB	SAB		SABOP	SAB_day4_D	D	Dox	BTAG	Y
sample 62	62	MS152Y63	Dox-inducible SOX17, TFAP2C, BLIMP1	Dox-inducible SOX17, TFAP2C, BLIMP1, clone_22; iPSC, MS152Y63	iPSC, from 585B1 hiPSC BTAG reporter line	iPSC	Blimp1-tdTomato, TFAP2C-EGFP	Transcriptome of amplified cDNA from PGCLC induction of Dox-inducible SOX17, TFAP2C, BLIMP1 series, clone 22, harvested at iPSC, non-sorted	MS152_63	YK_539	SAB22_iPS_I4_539	SAB22.iPS.I4	iPSC	SAB22	22	SAB	SAB		SABOP	SAB_iPSC			non
sample 63	63	MS152Y64	Dox-inducible SOX17, TFAP2C, BLIMP1	Dox-inducible SOX17, TFAP2C, BLIMP1, clone_28; iPSC, MS152Y64	iPSC, from 585B1 hiPSC BTAG reporter line	iPSC	Blimp1-tdTomato, TFAP2C-EGFP	Transcriptome of amplified cDNA from PGCLC induction of Dox-inducible SOX17, TFAP2C, BLIMP1 series, clone 28, harvested at iPSC, non-sorted	MS152_64	YK_540	SAB28_iPS_I4_540	SAB28.iPS.I4	iPSC	SAB28	28	SAB	SAB		SABOP	SAB_iPSC			non
sample 64	64	MS152Y65	Dox-inducible SOX17, TFAP2C, BLIMP1	Dox-inducible SOX17, TFAP2C, BLIMP1, clone_22; iMeLC, MS152Y65	iMeLC, from 585B1 hiPSC BTAG reporter line	iMeLC	Blimp1-tdTomato, TFAP2C-EGFP	Transcriptome of amplified cDNA from PGCLC induction of Dox-inducible SOX17, TFAP2C, BLIMP1 series, clone 22, harvested at iMeLC, non-sorted	MS152_65	YK_542	SAB22_iM_I4_542	SAB22.iM.I4	iMeLC	SAB22	22	SAB	SAB		SABOP	SAB_iMeLC			non
sample 65	65	MS152Y66	Dox-inducible SOX17, TFAP2C, BLIMP1	Dox-inducible SOX17, TFAP2C, BLIMP1, clone_28; iMeLC, MS152Y66	iMeLC, from 585B1 hiPSC BTAG reporter line	iMeLC	Blimp1-tdTomato, TFAP2C-EGFP	Transcriptome of amplified cDNA from PGCLC induction of Dox-inducible SOX17, TFAP2C, BLIMP1 series, clone 28, harvested at iMeLC, non-sorted	MS152_66	YK_543	SAB28_iM_I4_543	SAB28.iM.I4	iMeLC	SAB28	28	SAB	SAB		SABOP	SAB_iMeLC			non
sample 66	66	MS152Y67	Dox-inducible SOX17, TFAP2C, BLIMP1	Dox-inducible SOX17, TFAP2C, BLIMP1, clone_22; day1, MS152Y67	day1, from 585B1 hiPSC BTAG reporter line	day1	Blimp1-tdTomato, TFAP2C-EGFP	Transcriptome of amplified cDNA from PGCLC induction of Dox-inducible SOX17, TFAP2C, BLIMP1 series, clone 22, harvested at day1, non-sorted	MS152_67	YK_545	SAB22_d1_D_I4_545	SAB22.d1.D.I4	day1	SAB22	22	SAB	SAB		SABOP	SAB_day1_D	D	Dox	non
sample 67	67	MS152Y68	Dox-inducible SOX17, TFAP2C, BLIMP1	Dox-inducible SOX17, TFAP2C, BLIMP1, clone_22; day1, MS152Y68	day1, from 585B1 hiPSC BTAG reporter line	day1	Blimp1-tdTomato, TFAP2C-EGFP	Transcriptome of amplified cDNA from PGCLC induction of Dox-inducible SOX17, TFAP2C, BLIMP1 series, clone 22, harvested at day1, non-sorted	MS152_68	YK_546	SAB22_d1_BD_I4_546	SAB22.d1.BD.I4	day1	SAB22	22	SAB	SAB		SABOP	SAB_day1_BD	BD	BMP+Dox	non
sample 68	68	MS152Y69	Dox-inducible SOX17, TFAP2C, BLIMP1	Dox-inducible SOX17, TFAP2C, BLIMP1, clone_22; day1, MS152Y69	day1, from 585B1 hiPSC BTAG reporter line	day1	Blimp1-tdTomato, TFAP2C-EGFP	Transcriptome of amplified cDNA from PGCLC induction of Dox-inducible SOX17, TFAP2C, BLIMP1 series, clone 22, harvested at day1, non-sorted	MS152_69	YK_547	SAB22_d1_B_I4_547	SAB22.d1.B.I4	day1	SAB22	22	SAB	SAB		SABOP	SAB_day1_B	B	BMP	non
sample 69	69	MS152Y70	Dox-inducible SOX17, TFAP2C, BLIMP1	Dox-inducible SOX17, TFAP2C, BLIMP1, clone_28; day1, MS152Y70	day1, from 585B1 hiPSC BTAG reporter line	day1	Blimp1-tdTomato, TFAP2C-EGFP	Transcriptome of amplified cDNA from PGCLC induction of Dox-inducible SOX17, TFAP2C, BLIMP1 series, clone 28, harvested at day1, non-sorted	MS152_70	YK_548	SAB28_d1_D_I4_548	SAB28.d1.D.I4	day1	SAB28	28	SAB	SAB		SABOP	SAB_day1_D	D	Dox	non
sample 70	70	MS152Y71	Dox-inducible SOX17, TFAP2C, BLIMP1	Dox-inducible SOX17, TFAP2C, BLIMP1, clone_28; day1, MS152Y71	day1, from 585B1 hiPSC BTAG reporter line	day1	Blimp1-tdTomato, TFAP2C-EGFP	Transcriptome of amplified cDNA from PGCLC induction of Dox-inducible SOX17, TFAP2C, BLIMP1 series, clone 28, harvested at day1, non-sorted	MS152_71	YK_549	SAB28_d1_BD_I4_549	SAB28.d1.BD.I4	day1	SAB28	28	SAB	SAB		SABOP	SAB_day1_BD	BD	BMP+Dox	non
sample 71	71	MS152Y72	Dox-inducible SOX17, TFAP2C, BLIMP1	Dox-inducible SOX17, TFAP2C, BLIMP1, clone_28; day1, MS152Y72	day1, from 585B1 hiPSC BTAG reporter line	day1	Blimp1-tdTomato, TFAP2C-EGFP	Transcriptome of amplified cDNA from PGCLC induction of Dox-inducible SOX17, TFAP2C, BLIMP1 series, clone 28, harvested at day1, non-sorted	MS152_72	YK_550	SAB28_d1_B_I4_550	SAB28.d1.B.I4	day1	SAB28	28	SAB	SAB		SABOP	SAB_day1_B	B	BMP	non
sample 72	72	MS152Y73	Dox-inducible SOX17, TFAP2C, BLIMP1	Dox-inducible SOX17, TFAP2C, BLIMP1, clone_22; day2, MS152Y73	day2, from 585B1 hiPSC BTAG reporter line	day2	Blimp1-tdTomato, TFAP2C-EGFP	Transcriptome of amplified cDNA from PGCLC induction of Dox-inducible SOX17, TFAP2C, BLIMP1 series, clone 22, harvested at day2, BT-sorted	MS152_73	YK_554	SAB22_d2_D_I4_554	SAB22.d2.D.I4	day2	SAB22	22	SAB	SAB		SABOP	SAB_day2_D	D	Dox	BT
sample 73	73	MS152Y74	Dox-inducible SOX17, TFAP2C, BLIMP1	Dox-inducible SOX17, TFAP2C, BLIMP1, clone_22; day2, MS152Y74	day2, from 585B1 hiPSC BTAG reporter line	day2	Blimp1-tdTomato, TFAP2C-EGFP	Transcriptome of amplified cDNA from PGCLC induction of Dox-inducible SOX17, TFAP2C, BLIMP1 series, clone 22, harvested at day2, BTAG-sorted	MS152_74	YK_555	SAB22_d2_BD_I4_555	SAB22.d2.BD.I4	day2	SAB22	22	SAB	SAB		SABOP	SAB_day2_BD	BD	BMP+Dox	BTAG	Y
sample 74	74	MS152Y75	Dox-inducible SOX17, TFAP2C, BLIMP1	Dox-inducible SOX17, TFAP2C, BLIMP1, clone_22; day2, MS152Y75	day2, from 585B1 hiPSC BTAG reporter line	day2	Blimp1-tdTomato, TFAP2C-EGFP	Transcriptome of amplified cDNA from PGCLC induction of Dox-inducible SOX17, TFAP2C, BLIMP1 series, clone 22, harvested at day2, BTAG-sorted	MS152_75	YK_556	SAB22_d2_B_I4_556	SAB22.d2.B.I4	day2	SAB22	22	SAB	SAB		SABOP	SAB_day2_B	B	BMP	BTAG	Y
sample 75	75	MS152Y76	Dox-inducible SOX17, TFAP2C, BLIMP1	Dox-inducible SOX17, TFAP2C, BLIMP1, clone_28; day2, MS152Y76	day2, from 585B1 hiPSC BTAG reporter line	day2	Blimp1-tdTomato, TFAP2C-EGFP	Transcriptome of amplified cDNA from PGCLC induction of Dox-inducible SOX17, TFAP2C, BLIMP1 series, clone 28, harvested at day2, BT-sorted	MS152_76	YK_557	SAB28_d2_D_I4_557	SAB28.d2.D.I4	day2	SAB28	28	SAB	SAB		SABOP	SAB_day2_D	D	Dox	BT
sample 76	76	MS152Y77	Dox-inducible SOX17, TFAP2C, BLIMP1	Dox-inducible SOX17, TFAP2C, BLIMP1, clone_28; day2, MS152Y77	day2, from 585B1 hiPSC BTAG reporter line	day2	Blimp1-tdTomato, TFAP2C-EGFP	Transcriptome of amplified cDNA from PGCLC induction of Dox-inducible SOX17, TFAP2C, BLIMP1 series, clone 28, harvested at day2, BTAG-sorted	MS152_77	YK_558	SAB28_d2_BD_I4_558	SAB28.d2.BD.I4	day2	SAB28	28	SAB	SAB		SABOP	SAB_day2_BD	BD	BMP+Dox	BTAG	Y
sample 77	77	MS152Y78	Dox-inducible SOX17, TFAP2C, BLIMP1	Dox-inducible SOX17, TFAP2C, BLIMP1, clone_28; day2, MS152Y78	day2, from 585B1 hiPSC BTAG reporter line	day2	Blimp1-tdTomato, TFAP2C-EGFP	Transcriptome of amplified cDNA from PGCLC induction of Dox-inducible SOX17, TFAP2C, BLIMP1 series, clone 28, harvested at day2, BTAG-sorted	MS152_78	YK_559	SAB28_d2_B_I4_559	SAB28.d2.B.I4	day2	SAB28	28	SAB	SAB		SABOP	SAB_day2_B	B	BMP	BTAG	Y
sample 84	84	MS168Y1	Dox-inducible SOX17, TFAP2C, GATA3	Dox-inducible SOX17, TFAP2C, GATA3, clone_1; day2, MS168Y1	day2, from 585B1 hiPSC BTAG reporter line	day2	Blimp1-tdTomato, TFAP2C-EGFP	Transcriptome of amplified cDNA from PGCLC induction of Dox-inducible SOX17, TFAP2C, GATA3 series, clone 1, harvested at day2, BTAG-sorted	MS168_1	YK_572	SAG3_C1_I1_D1_d2_572	SAG3.1.I1.D.d2	day2	SAG3_1	1	SAG3	SAG3	1	SAG3OP	SAG3_day2_D	D	Dox	BTAG	Y
sample 85	85	MS168Y2	Dox-inducible SOX17, TFAP2C, GATA3	Dox-inducible SOX17, TFAP2C, GATA3, clone_5; day2, MS168Y2	day2, from 585B1 hiPSC BTAG reporter line	day2	Blimp1-tdTomato, TFAP2C-EGFP	Transcriptome of amplified cDNA from PGCLC induction of Dox-inducible SOX17, TFAP2C, GATA3 series, clone 5, harvested at day2, BTAG-sorted	MS168_2	YK_573	SAG3_C5_I1_D1_d2_573	SAG3.5.I1.D.d2	day2	SAG3_5	5	SAG3	SAG3	1	SAG3OP	SAG3_day2_D	D	Dox	BTAG	Y
sample 86	86	MS168Y3	Dox-inducible SOX17, TFAP2C, GATA3	Dox-inducible SOX17, TFAP2C, GATA3, clone_11; day2, MS168Y3	day2, from 585B1 hiPSC BTAG reporter line	day2	Blimp1-tdTomato, TFAP2C-EGFP	Transcriptome of amplified cDNA from PGCLC induction of Dox-inducible SOX17, TFAP2C, GATA3 series, clone 11, harvested at day2, BTAG-sorted	MS168_3	YK_574	SAG3_C11_I1_D1_d2_574	SAG3.11.I1.D.d2	day2	SAG3_11	11	SAG3	SAG3	1	SAG3OP	SAG3_day2_D	D	Dox	BTAG
sample 93	93	MS168Y10	Dox-inducible SOX17, TFAP2C, GATA3	Dox-inducible SOX17, TFAP2C, GATA3, clone_1; iMeLC, MS168Y10	iMeLC, from 585B1 hiPSC BTAG reporter line	iMeLC	Blimp1-tdTomato, TFAP2C-EGFP	Transcriptome of amplified cDNA from PGCLC induction of Dox-inducible SOX17, TFAP2C, GATA3 series, clone 1, harvested at iMeLC, non-sorted	MS168_10	YK_581	SAG3_C1_I2__iM_581	SAG3.1.I2..iM	iMeLC	SAG3_1	1	SAG3	SAG3	2	SAG3OP	SAG3_iMeLC			non
sample 94	94	MS168Y11	Dox-inducible SOX17, TFAP2C, GATA3	Dox-inducible SOX17, TFAP2C, GATA3, clone_5; iMeLC, MS168Y11	iMeLC, from 585B1 hiPSC BTAG reporter line	iMeLC	Blimp1-tdTomato, TFAP2C-EGFP	Transcriptome of amplified cDNA from PGCLC induction of Dox-inducible SOX17, TFAP2C, GATA3 series, clone 5, harvested at iMeLC, non-sorted	MS168_11	YK_582	SAG3_C5_I2__iM_582	SAG3.5.I2..iM	iMeLC	SAG3_5	5	SAG3	SAG3	2	SAG3OP	SAG3_iMeLC			non
sample 95	95	MS168Y12	Dox-inducible SOX17, TFAP2C, GATA3	Dox-inducible SOX17, TFAP2C, GATA3, clone_11; iMeLC, MS168Y12	iMeLC, from 585B1 hiPSC BTAG reporter line	iMeLC	Blimp1-tdTomato, TFAP2C-EGFP	Transcriptome of amplified cDNA from PGCLC induction of Dox-inducible SOX17, TFAP2C, GATA3 series, clone 11, harvested at iMeLC, non-sorted	MS168_12	YK_583	SAG3_C11_I2__iM_583	SAG3.11.I2..iM	iMeLC	SAG3_11	11	SAG3	SAG3	2	SAG3OP	SAG3_iMeLC			non
sample 96	96	MS168Y13	Dox-inducible SOX17, TFAP2C, GATA3	Dox-inducible SOX17, TFAP2C, GATA3, clone_12; iMeLC, MS168Y13	iMeLC, from 585B1 hiPSC BTAG reporter line	iMeLC	Blimp1-tdTomato, TFAP2C-EGFP	Transcriptome of amplified cDNA from PGCLC induction of Dox-inducible SOX17, TFAP2C, GATA3 series, clone 12, harvested at iMeLC, non-sorted	MS168_13	YK_584	SAG3_C12_I2__iM_584	SAG3.12.I2..iM	iMeLC	SAG3_12	12	SAG3	SAG3	2	SAG3OP	SAG3_iMeLC			non
sample 103	103	MS168Y20	Dox-inducible SOX17, TFAP2C, GATA3	Dox-inducible SOX17, TFAP2C, GATA3, clone_1; day2, MS168Y20	day2, from 585B1 hiPSC BTAG reporter line	day2	Blimp1-tdTomato, TFAP2C-EGFP	Transcriptome of amplified cDNA from PGCLC induction of Dox-inducible SOX17, TFAP2C, GATA3 series, clone 1, harvested at day2, BTAG-sorted	MS168_20	YK_591	SAG3_C1_I2_D1_d2_591	SAG3.1.I2.D.d2	day2	SAG3_1	1	SAG3	SAG3	2	SAG3OP	SAG3_day2_D	D	Dox	BTAG	Y
sample 104	104	MS168Y21	Dox-inducible SOX17, TFAP2C, GATA3	Dox-inducible SOX17, TFAP2C, GATA3, clone_5; day2, MS168Y21	day2, from 585B1 hiPSC BTAG reporter line	day2	Blimp1-tdTomato, TFAP2C-EGFP	Transcriptome of amplified cDNA from PGCLC induction of Dox-inducible SOX17, TFAP2C, GATA3 series, clone 5, harvested at day2, BTAG-sorted	MS168_21	YK_592	SAG3_C5_I2_D1_d2_592	SAG3.5.I2.D.d2	day2	SAG3_5	5	SAG3	SAG3	2	SAG3OP	SAG3_day2_D	D	Dox	BTAG	Y
sample 105	105	MS168Y22	Dox-inducible SOX17, TFAP2C, GATA3	Dox-inducible SOX17, TFAP2C, GATA3, clone_11; day2, MS168Y22	day2, from 585B1 hiPSC BTAG reporter line	day2	Blimp1-tdTomato, TFAP2C-EGFP	Transcriptome of amplified cDNA from PGCLC induction of Dox-inducible SOX17, TFAP2C, GATA3 series, clone 11, harvested at day2, BTAG-sorted	MS168_22	YK_593	SAG3_C11_I2_D1_d2_593	SAG3.11.I2.D.d2	day2	SAG3_11	11	SAG3	SAG3	2	SAG3OP	SAG3_day2_D	D	Dox	BTAG
sample 106	106	MS168Y23	Dox-inducible SOX17, TFAP2C, GATA3	Dox-inducible SOX17, TFAP2C, GATA3, clone_12; day2, MS168Y23	day2, from 585B1 hiPSC BTAG reporter line	day2	Blimp1-tdTomato, TFAP2C-EGFP	Transcriptome of amplified cDNA from PGCLC induction of Dox-inducible SOX17, TFAP2C, GATA3 series, clone 12, harvested at day2, BTAG-sorted	MS168_23	YK_594	SAG3_C12_I2_D1_d2_594	SAG3.12.I2.D.d2	day2	SAG3_12	12	SAG3	SAG3	2	SAG3OP	SAG3_day2_D	D	Dox	BTAG
sample 113	113	MS168Y30	Dox-inducible SOX17, TFAP2C, GATA3	Dox-inducible SOX17, TFAP2C, GATA3, clone_1; day4, MS168Y30	day4, from 585B1 hiPSC BTAG reporter line	day4	Blimp1-tdTomato, TFAP2C-EGFP	Transcriptome of amplified cDNA from PGCLC induction of Dox-inducible SOX17, TFAP2C, GATA3 series, clone 1, harvested at day4, BTAG-sorted	MS168_30	YK_601	SAG3_C1_I2_D1_d4_601	SAG3.1.I2.D.d4	day4	SAG3_1	1	SAG3	SAG3	2	SAG3OP	SAG3_day4_D	D	Dox	BTAG	Y
sample 114	114	MS168Y31	Dox-inducible SOX17, TFAP2C, GATA3	Dox-inducible SOX17, TFAP2C, GATA3, clone_5; day4, MS168Y31	day4, from 585B1 hiPSC BTAG reporter line	day4	Blimp1-tdTomato, TFAP2C-EGFP	Transcriptome of amplified cDNA from PGCLC induction of Dox-inducible SOX17, TFAP2C, GATA3 series, clone 5, harvested at day4, BTAG-sorted	MS168_31	YK_602	SAG3_C5_I2_D1_d4_602	SAG3.5.I2.D.d4	day4	SAG3_5	5	SAG3	SAG3	2	SAG3OP	SAG3_day4_D	D	Dox	BTAG	Y
sample 115	115	MS168Y32	Dox-inducible SOX17, TFAP2C, GATA3	Dox-inducible SOX17, TFAP2C, GATA3, clone_11; day4, MS168Y32	day4, from 585B1 hiPSC BTAG reporter line	day4	Blimp1-tdTomato, TFAP2C-EGFP	Transcriptome of amplified cDNA from PGCLC induction of Dox-inducible SOX17, TFAP2C, GATA3 series, clone 11, harvested at day4, BTAG-sorted	MS168_32	YK_603	SAG3_C11_I2_D1_d4_603	SAG3.11.I2.D.d4	day4	SAG3_11	11	SAG3	SAG3	2	SAG3OP	SAG3_day4_D	D	Dox	BTAG
sample 116	116	MS168Y33	Dox-inducible SOX17, TFAP2C, GATA3	Dox-inducible SOX17, TFAP2C, GATA3, clone_12; day4, MS168Y33	day4, from 585B1 hiPSC BTAG reporter line	day4	Blimp1-tdTomato, TFAP2C-EGFP	Transcriptome of amplified cDNA from PGCLC induction of Dox-inducible SOX17, TFAP2C, GATA3 series, clone 12, harvested at day4, BTAG-sorted	MS168_33	YK_604	SAG3_C12_I2_D1_d4_604	SAG3.12.I2.D.d4	day4	SAG3_12	12	SAG3	SAG3	2	SAG3OP	SAG3_day4_D	D	Dox	BTAG
sample 118	118	MS168Y35	Dox-inducible SOX17, TFAP2C, GATA3	Dox-inducible SOX17, TFAP2C, GATA3, clone_1; iMeLC, MS168Y35	iMeLC, from 585B1 hiPSC BTAG reporter line	iMeLC	Blimp1-tdTomato, TFAP2C-EGFP	Transcriptome of amplified cDNA from PGCLC induction of Dox-inducible SOX17, TFAP2C, GATA3 series, clone 1, harvested at iMeLC, non-sorted	MS168_35	YK_606	SAG3_C1_I3_D1_iM_606	SAG3.1.I3.D.iM	iMeLC	SAG3_1	1	SAG3	SAG3	3	SAG3OP	SAG3_iMeLC			non
sample 119	119	MS168Y36	Dox-inducible SOX17, TFAP2C, GATA3	Dox-inducible SOX17, TFAP2C, GATA3, clone_5; iMeLC, MS168Y36	iMeLC, from 585B1 hiPSC BTAG reporter line	iMeLC	Blimp1-tdTomato, TFAP2C-EGFP	Transcriptome of amplified cDNA from PGCLC induction of Dox-inducible SOX17, TFAP2C, GATA3 series, clone 5, harvested at iMeLC, non-sorted	MS168_36	YK_607	SAG3_C5_I3_D1_iM_607	SAG3.5.I3.D.iM	iMeLC	SAG3_5	5	SAG3	SAG3	3	SAG3OP	SAG3_iMeLC			non
sample 124	124	MS168Y41	Dox-inducible SOX17, TFAP2C, GATA3	Dox-inducible SOX17, TFAP2C, GATA3, clone_1; day2, MS168Y41	day2, from 585B1 hiPSC BTAG reporter line	day2	Blimp1-tdTomato, TFAP2C-EGFP	Transcriptome of amplified cDNA from PGCLC induction of Dox-inducible SOX17, TFAP2C, GATA3 series, clone 1, harvested at day2, BTAG-sorted	MS168_41	YK_612	SAG3_C1_I3_D1_d2_612	SAG3.1.I3.D.d2	day2	SAG3_1	1	SAG3	SAG3	3	SAG3OP	SAG3_day2_D	D	Dox	BTAG	Y
sample 125	125	MS168Y42	Dox-inducible SOX17, TFAP2C, GATA3	Dox-inducible SOX17, TFAP2C, GATA3, clone_5; day2, MS168Y42	day2, from 585B1 hiPSC BTAG reporter line	day2	Blimp1-tdTomato, TFAP2C-EGFP	Transcriptome of amplified cDNA from PGCLC induction of Dox-inducible SOX17, TFAP2C, GATA3 series, clone 5, harvested at day2, BTAG-sorted	MS168_42	YK_613	SAG3_C5_I3_D1_d2_613	SAG3.5.I3.D.d2	day2	SAG3_5	5	SAG3	SAG3	3	SAG3OP	SAG3_day2_D	D	Dox	BTAG	Y
sample 130	130	MS168Y47	Dox-inducible SOX17, TFAP2C, GATA3	Dox-inducible SOX17, TFAP2C, GATA3, clone_1; day4, MS168Y47	day4, from 585B1 hiPSC BTAG reporter line	day4	Blimp1-tdTomato, TFAP2C-EGFP	Transcriptome of amplified cDNA from PGCLC induction of Dox-inducible SOX17, TFAP2C, GATA3 series, clone 1, harvested at day4, BTAG-sorted	MS168_47	YK_618	SAG3_C1_I3_D1_d4_618	SAG3.1.I3.D.d4	day4	SAG3_1	1	SAG3	SAG3	3	SAG3OP	SAG3_day4_D	D	Dox	BTAG	Y
sample 131	131	MS168Y48	Dox-inducible SOX17, TFAP2C, GATA3	Dox-inducible SOX17, TFAP2C, GATA3, clone_5; day4, MS168Y48	day4, from 585B1 hiPSC BTAG reporter line	day4	Blimp1-tdTomato, TFAP2C-EGFP	Transcriptome of amplified cDNA from PGCLC induction of Dox-inducible SOX17, TFAP2C, GATA3 series, clone 5, harvested at day4, BTAG-sorted	MS168_48	YK_619	SAG3_C5_I3_D1_d4_619	SAG3.5.I3.D.d4	day4	SAG3_5	5	SAG3	SAG3	3	SAG3OP	SAG3_day4_D	D	Dox	BTAG	Y
sample 136	136	MS188Y89	Dox-inducible SOX17, TFAP2C, GATA3	Dox-inducible SOX17, TFAP2C, GATA3, clone_1; day6, MS188Y89	day6, from 585B1 hiPSC BTAG reporter line	day6	Blimp1-tdTomato, TFAP2C-EGFP	Transcriptome of amplified cDNA from PGCLC induction of Dox-inducible SOX17, TFAP2C, GATA3 series, clone 1, harvested at day6, BTAG-sorted	MS188_89	YK_628	SAG1_I5_d6_628	SAG1.I5.d6	day6	SAG3_1	1	SAG3	SAG3	1	SAG3OP	SAG3_day6	D	Dox	BTAG	Y
sample 137	137	MS188Y90	Dox-inducible SOX17, TFAP2C, GATA3	Dox-inducible SOX17, TFAP2C, GATA3, clone_5; day6, MS188Y90	day6, from 585B1 hiPSC BTAG reporter line	day6	Blimp1-tdTomato, TFAP2C-EGFP	Transcriptome of amplified cDNA from PGCLC induction of Dox-inducible SOX17, TFAP2C, GATA3 series, clone 5, harvested at day6, BTAG-sorted	MS188_90	YK_629	SAG5_I5_d6_629	SAG5.I5.d6	day6	SAG3_5	5	SAG3	SAG3	1	SAG3OP	SAG3_day6	D	Dox	BTAG	Y
sample 139	139	MS188Y92	Dox-inducible SOX17, TFAP2C, GATA3	Dox-inducible SOX17, TFAP2C, GATA3, clone_1; day6, MS188Y92	day6, from 585B1 hiPSC BTAG reporter line	day6	Blimp1-tdTomato, TFAP2C-EGFP	Transcriptome of amplified cDNA from PGCLC induction of Dox-inducible SOX17, TFAP2C, GATA3 series, clone 1, harvested at day6, BTAG-sorted	MS188_92	YK_631	SAG1_I6_d6_631	SAG1.I6.d6	day6	SAG3_1	1	SAG3	SAG3	2	SAG3OP	SAG3_day6	D	Dox	BTAG	Y
sample 140	140	MS188Y93	Dox-inducible SOX17, TFAP2C, GATA3	Dox-inducible SOX17, TFAP2C, GATA3, clone_5; day6, MS188Y93	day6, from 585B1 hiPSC BTAG reporter line	day6	Blimp1-tdTomato, TFAP2C-EGFP	Transcriptome of amplified cDNA from PGCLC induction of Dox-inducible SOX17, TFAP2C, GATA3 series, clone 5, harvested at day6, BTAG-sorted	MS188_93	YK_632	SAG5_I6_d6_632	SAG5.I6.d6	day6	SAG3_5	5	SAG3	SAG3	2	SAG3OP	SAG3_day6	D	Dox	BTAG	Y
sample 141	141	MS188Y94	Dox-inducible SOX17, TFAP2C, GATA3	Dox-inducible SOX17, TFAP2C, GATA3, clone_1; day6, MS188Y94	day6, from 585B1 hiPSC BTAG reporter line	day6	Blimp1-tdTomato, TFAP2C-EGFP	Transcriptome of amplified cDNA from PGCLC induction of Dox-inducible SOX17, TFAP2C, GATA3 series, clone 1, harvested at day6, BTAG-sorted	MS188_94	YK_636	SAG1_I6_d6_A8_01_636	SAG1.I6.d6.A83	day6	SAG3_1	1	SAG3	SAG3	1	SAG3OP	SAG3_day6	D	Dox	BTAG	Y
sample 142	142	MS188Y95	Dox-inducible SOX17, TFAP2C, GATA3	Dox-inducible SOX17, TFAP2C, GATA3, clone_5; day6, MS188Y95	day6, from 585B1 hiPSC BTAG reporter line	day6	Blimp1-tdTomato, TFAP2C-EGFP	Transcriptome of amplified cDNA from PGCLC induction of Dox-inducible SOX17, TFAP2C, GATA3 series, clone 5, harvested at day6, BTAG-sorted	MS188_95	YK_639	SAG5_I6_d6_A8_01_639	SAG5.I6.d6.A83	day6	SAG3_5	5	SAG3	SAG3	1	SAG3OP	SAG3_day6	D	Dox	BTAG	Y
sample 143	143	MS188Y96	Dox-inducible SOX17, TFAP2C, GATA3	Dox-inducible SOX17, TFAP2C, GATA3, clone_1; day6, MS188Y96	day6, from 585B1 hiPSC BTAG reporter line	day6	Blimp1-tdTomato, TFAP2C-EGFP	Transcriptome of amplified cDNA from PGCLC induction of Dox-inducible SOX17, TFAP2C, GATA3 series, clone 1, harvested at day6, BTAG-sorted	MS188_96	YK_640	SAG1_I7_d6_640	SAG1.I7.d6	day6	SAG3_1	1	SAG3	SAG3	3	SAG3OP	SAG3_day6	D	Dox	BTAG	Y
sample 144	144	MS188Y97	Dox-inducible SOX17, TFAP2C, GATA3	Dox-inducible SOX17, TFAP2C, GATA3, clone_5; day6, MS188Y97	day6, from 585B1 hiPSC BTAG reporter line	day6	Blimp1-tdTomato, TFAP2C-EGFP	Transcriptome of amplified cDNA from PGCLC induction of Dox-inducible SOX17, TFAP2C, GATA3 series, clone 5, harvested at day6, BTAG-sorted	MS188_97	YK_641	SAG5_I7_d6_641	SAG5.I7.d6	day6	SAG3_5	5	SAG3	SAG3	3	SAG3OP	SAG3_day6	D	Dox	BTAG	Y
sample 145	145	MS188Y98	Dox-inducible SOX17, TFAP2C, GATA3	Dox-inducible SOX17, TFAP2C, GATA3, clone_1; day8, MS188Y98	day8, from 585B1 hiPSC BTAG reporter line	day8	Blimp1-tdTomato, TFAP2C-EGFP	Transcriptome of amplified cDNA from PGCLC induction of Dox-inducible SOX17, TFAP2C, GATA3 series, clone 1, harvested at day8, BTAG-sorted	MS188_98	YK_642	SAG1_I7_d8_642	SAG1.I7.d8	day8	SAG3_1	1	SAG3	SAG3	1	SAG3OP	SAG3_day8	D	Dox	BTAG	Y
sample 146	146	MS188Y99	Dox-inducible SOX17, TFAP2C, GATA3	Dox-inducible SOX17, TFAP2C, GATA3, clone_5; day8, MS188Y99	day8, from 585B1 hiPSC BTAG reporter line	day8	Blimp1-tdTomato, TFAP2C-EGFP	Transcriptome of amplified cDNA from PGCLC induction of Dox-inducible SOX17, TFAP2C, GATA3 series, clone 5, harvested at day8, BTAG-sorted	MS188_99	YK_643	SAG5_I7_d8_643	SAG5.I7.d8	day8	SAG3_5	5	SAG3	SAG3	1	SAG3OP	SAG3_day8	D	Dox	BTAG	Y
sample 147	147	MS188Y100	Dox-inducible SOX17, TFAP2C, GATA3	Dox-inducible SOX17, TFAP2C, GATA3, clone_1; day6, MS188Y100	day6, from 585B1 hiPSC BTAG reporter line	day6	Blimp1-tdTomato, TFAP2C-EGFP	Transcriptome of amplified cDNA from PGCLC induction of Dox-inducible SOX17, TFAP2C, GATA3 series, clone 1, harvested at day6, BTAG-sorted	MS188_100	YK_644	SAG1_I8_d6_A83_644	SAG1.I8.d6.A83	day6	SAG3_1	1	SAG3	SAG3	1	SAG3OP	SAG3_day6	D	Dox	BTAG	Y
sample 148	148	MS188Y101	Dox-inducible SOX17, TFAP2C, GATA3	Dox-inducible SOX17, TFAP2C, GATA3, clone_1; day6, MS188Y101	day6, from 585B1 hiPSC BTAG reporter line	day6	Blimp1-tdTomato, TFAP2C-EGFP	Transcriptome of amplified cDNA from PGCLC induction of Dox-inducible SOX17, TFAP2C, GATA3 series, clone 1, harvested at day6, BTAG-sorted	MS188_101	YK_645	SAG1_I8_d6_645	SAG1.I8.d6	day6	SAG3_1	1	SAG3	SAG3	4	SAG3OP	SAG3_day6	D	Dox	BTAG	Y
sample 179	179	MS192Y103	Dox-inducible SOX17, TFAP2C, GATA3	Dox-inducible SOX17, TFAP2C, GATA3, clone_1; day6, MS192Y103	day6, from 585B1 hiPSC BTAG reporter line	day6	Blimp1-tdTomato, TFAP2C-EGFP	Transcriptome of amplified cDNA from PGCLC induction of Dox-inducible SOX17, TFAP2C, GATA3 series, clone 1, harvested at day6, BTAG-sorted	MS192_103	YK_709	SAG1 I9 D4 d6_709	SAG1.I9.D4.d6	day6	SAG3_1	1	SAG3	SAG3	3	SAG3OP	SAG3_day6	D	Dox	BTAG	Y
sample 180	180	MS192Y104	Dox-inducible SOX17, TFAP2C, GATA3	Dox-inducible SOX17, TFAP2C, GATA3, clone_1; day6, MS192Y104	day6, from 585B1 hiPSC BTAG reporter line	day6	Blimp1-tdTomato, TFAP2C-EGFP	Transcriptome of amplified cDNA from PGCLC induction of Dox-inducible SOX17, TFAP2C, GATA3 series, clone 1, harvested at day6, BTAG-sorted	MS192_104	YK_710	SAG1 I9 D6 d6_710	SAG1.I9.d6	day6	SAG3_1	1	SAG3	SAG3	3	SAG3OP	SAG3_day6	D	Dox	BTAG	Y
sample 181	181	MS192Y105	Dox-inducible SOX17, TFAP2C, GATA3	Dox-inducible SOX17, TFAP2C, GATA3, clone_1; day77, MS192Y105	day77, from 585B1 hiPSC BTAG reporter line	day77	Blimp1-tdTomato, TFAP2C-EGFP	Transcriptome of amplified cDNA from PGCLC induction of Dox-inducible SOX17, TFAP2C, GATA3 series, clone 1, harvested at day77, BTAG-sorted	MS192_105	YK_711	SAG1 re2 d77_711	SAG1.re2.d77	day77	SAG3_1	1	SAG3	SAG3	2	SAG3OP_r	SAG3_day77			BTAG	Y
sample 182	182	MS192Y106	Dox-inducible SOX17, TFAP2C, GATA3	Dox-inducible SOX17, TFAP2C, GATA3, clone_1; day77, MS192Y106	day77, from 585B1 hiPSC BTAG reporter line	day77	Blimp1-tdTomato, TFAP2C-EGFP	Transcriptome of amplified cDNA from PGCLC induction of Dox-inducible SOX17, TFAP2C, GATA3 series, clone 1, harvested at day77, BTAG-sorted	MS192_106	YK_712	SAG1A re2 d77_712	SAG1.re2.d77A	day77	SAG3_1	1	SAG3	SAG3	2	SAG3OP_r	SAG3_day77			BTAG	Y
sample 17	17	MS151Y097	Dox-inducible SOX17, BLIMP1	Dox-inducible SOX17, BLIMP1, clone_9; iPSC, MS151Y097	iPSC, from 585B1 hiPSC BTAG reporter line	iPSC	Blimp1-tdTomato, TFAP2C-EGFP	Transcriptome of amplified cDNA from PGCLC induction of Dox-inducible SOX17, BLIMP1 series, clone 9, harvested at iPSC, non-sorted	MS151_097	YK_483	SB9_iPSC_I3_483	SB9.iPSC.I3	iPSC	SB9	9	SB	SB		SBOP	SB_iPSC			non
sample 20	20	MS151Y100	Dox-inducible SOX17, BLIMP1	Dox-inducible SOX17, BLIMP1, clone_9; day2, MS151Y100	day2, from 585B1 hiPSC BTAG reporter line	day2	Blimp1-tdTomato, TFAP2C-EGFP	Transcriptome of amplified cDNA from PGCLC induction of Dox-inducible SOX17, BLIMP1 series, clone 9, harvested at day2, non-sorted	MS151_100	YK_486	SB9_d2_D_I3_486	SB9.d2.D.I3	day2	SB9	9	SB	SB		SBOP	SB_day2_D	D	Dox	non
sample 29	29	MS151Y109	Dox-inducible SOX17, BLIMP1	Dox-inducible SOX17, BLIMP1, clone_9; iPSC, MS151Y109	iPSC, from 585B1 hiPSC BTAG reporter line	iPSC	Blimp1-tdTomato, TFAP2C-EGFP	Transcriptome of amplified cDNA from PGCLC induction of Dox-inducible SOX17, BLIMP1 series, clone 9, harvested at iPSC, non-sorted	MS151_109	YK_495	SB9_iPSC_I5_495	SB9.iPSC.I5	iPSC	SB9	9	SB	SB		SBOP	SB_iPSC			non
sample 32	32	MS151Y112	Dox-inducible SOX17, BLIMP1	Dox-inducible SOX17, BLIMP1, clone_9; iMeLC, MS151Y112	iMeLC, from 585B1 hiPSC BTAG reporter line	iMeLC	Blimp1-tdTomato, TFAP2C-EGFP	Transcriptome of amplified cDNA from PGCLC induction of Dox-inducible SOX17, BLIMP1 series, clone 9, harvested at iMeLC, non-sorted	MS151_112	YK_498	SB9_iM_I5_498	SB9.iM.I5	iMeLC	SB9	9	SB	SB		SBOP	SB_iMeLC			non
sample 35	35	MS151Y115	Dox-inducible SOX17, BLIMP1	Dox-inducible SOX17, BLIMP1, clone_9; day1, MS151Y115	day1, from 585B1 hiPSC BTAG reporter line	day1	Blimp1-tdTomato, TFAP2C-EGFP	Transcriptome of amplified cDNA from PGCLC induction of Dox-inducible SOX17, BLIMP1 series, clone 9, harvested at day1, non-sorted	MS151_115	YK_501	SB9_d1_D_I5_501	SB9.d1.D.I5	day1	SB9	9	SB	SB		SBOP	SB_day1_D	D	Dox	non
sample 38	38	MS151Y118	Dox-inducible SOX17, BLIMP1	Dox-inducible SOX17, BLIMP1, clone_9; day2, MS151Y118	day2, from 585B1 hiPSC BTAG reporter line	day2	Blimp1-tdTomato, TFAP2C-EGFP	Transcriptome of amplified cDNA from PGCLC induction of Dox-inducible SOX17, BLIMP1 series, clone 9, harvested at day2, BT-sorted	MS151_118	YK_504	SB9_d2_D_BT_I5_504	SB9.d2.D.BT.I5	day2	SB9	9	SB	SB		SBOP	SB_day2_D	D	Dox	BT
sample 42	42	MS151Y122	Dox-inducible SOX17, BLIMP1	Dox-inducible SOX17, BLIMP1, clone_9; day4, MS151Y122	day4, from 585B1 hiPSC BTAG reporter line	day4	Blimp1-tdTomato, TFAP2C-EGFP	Transcriptome of amplified cDNA from PGCLC induction of Dox-inducible SOX17, BLIMP1 series, clone 9, harvested at day4, BT-sorted	MS151_122	YK_508	SB9_d4_D_BT_I5_508	SB9.d4.D.BT.I5	day4	SB9	9	SB	SB		SBOP	SB_day4_D	D	Dox	BT
sample 45	45	MS151Y125	Dox-inducible SOX17, BLIMP1	Dox-inducible SOX17, BLIMP1, clone_9; iMeLC, MS151Y125	iMeLC, from 585B1 hiPSC BTAG reporter line	iMeLC	Blimp1-tdTomato, TFAP2C-EGFP	Transcriptome of amplified cDNA from PGCLC induction of Dox-inducible SOX17, BLIMP1 series, clone 9, harvested at iMeLC, non-sorted	MS151_125	YK_511	SB9_iM_I6_511	SB9.iM.I6	iMeLC	SB9	9	SB	SB		SBOP	SB_iMeLC			non
sample 48	48	MS151Y128	Dox-inducible SOX17, BLIMP1	Dox-inducible SOX17, BLIMP1, clone_9; day1, MS151Y128	day1, from 585B1 hiPSC BTAG reporter line	day1	Blimp1-tdTomato, TFAP2C-EGFP	Transcriptome of amplified cDNA from PGCLC induction of Dox-inducible SOX17, BLIMP1 series, clone 9, harvested at day1, non-sorted	MS151_128	YK_514	SB9_d1_D_I6_514	SB9.d1.D.I6	day1	SB9	9	SB	SB		SBOP	SB_day1_D	D	Dox	non
sample 51	51	MS152Y52	Dox-inducible SOX17, BLIMP1	Dox-inducible SOX17, BLIMP1, clone_9; day2, MS152Y52	day2, from 585B1 hiPSC BTAG reporter line	day2	Blimp1-tdTomato, TFAP2C-EGFP	Transcriptome of amplified cDNA from PGCLC induction of Dox-inducible SOX17, BLIMP1 series, clone 9, harvested at day2, non-sorted	MS152_52	YK_518	SB9_d2_D_w_I6_518	SB9.d2.D.w.I6	day2	SB9	9	SB	SB		SBOP	SB_day2_D	D	Dox	non
sample 52	52	MS152Y53	Dox-inducible SOX17, BLIMP1	Dox-inducible SOX17, BLIMP1, clone_9; day2, MS152Y53	day2, from 585B1 hiPSC BTAG reporter line	day2	Blimp1-tdTomato, TFAP2C-EGFP	Transcriptome of amplified cDNA from PGCLC induction of Dox-inducible SOX17, BLIMP1 series, clone 9, harvested at day2, non-sorted	MS152_53	YK_519	SB9_d2_D_I5_519	SB9.d2.D.I5	day2	SB9	9	SB	SB		SBOP	SB_day2_D	D	Dox	non
sample 87	87	MS168Y4	Dox-inducible SOX17, GATA3	Dox-inducible SOX17, GATA3, clone_2; day2, MS168Y4	day2, from 585B1 hiPSC BTAG reporter line	day2	Blimp1-tdTomato, TFAP2C-EGFP	Transcriptome of amplified cDNA from PGCLC induction of Dox-inducible SOX17, GATA3 series, clone 2, harvested at day2, BTAG-sorted	MS168_4	YK_575	SG3_C2_I1_D1_d2_575	SG3.2.I1.D.d2	day2	SG3_2	2	SG3	SG3	1	SG3OP	SG3_day2_D	D	Dox	BTAG
sample 97	97	MS168Y14	Dox-inducible SOX17, GATA3	Dox-inducible SOX17, GATA3, clone_2; iMeLC, MS168Y14	iMeLC, from 585B1 hiPSC BTAG reporter line	iMeLC	Blimp1-tdTomato, TFAP2C-EGFP	Transcriptome of amplified cDNA from PGCLC induction of Dox-inducible SOX17, GATA3 series, clone 2, harvested at iMeLC, non-sorted	MS168_14	YK_585	SG3_C2_I2__iM_585	SG3.2.I2..iM	iMeLC	SG3_2	2	SG3	SG3	2	SG3OP	SG3_iMeLC			non
sample 107	107	MS168Y24	Dox-inducible SOX17, GATA3	Dox-inducible SOX17, GATA3, clone_2; day2, MS168Y24	day2, from 585B1 hiPSC BTAG reporter line	day2	Blimp1-tdTomato, TFAP2C-EGFP	Transcriptome of amplified cDNA from PGCLC induction of Dox-inducible SOX17, GATA3 series, clone 2, harvested at day2, BTAG-sorted	MS168_24	YK_595	SG3_C2_I2_D1_d2_595	SG3.2.I2.D.d2	day2	SG3_2	2	SG3	SG3	2	SG3OP	SG3_day2_D	D	Dox	BTAG
sample 117	117	MS168Y34	Dox-inducible SOX17, GATA3	Dox-inducible SOX17, GATA3, clone_2; day4, MS168Y34	day4, from 585B1 hiPSC BTAG reporter line	day4	Blimp1-tdTomato, TFAP2C-EGFP	Transcriptome of amplified cDNA from PGCLC induction of Dox-inducible SOX17, GATA3 series, clone 2, harvested at day4, BTAG-sorted	MS168_34	YK_605	SG3_C2_I2_D1_d4_605	SG3.2.I2.D.d4	day4	SG3_2	2	SG3	SG3	2	SG3OP	SG3_day4_D	D	Dox	BTAG
sample 120	120	MS168Y37	Dox-inducible SOX17, GATA3	Dox-inducible SOX17, GATA3, clone_2; iMeLC, MS168Y37	iMeLC, from 585B1 hiPSC BTAG reporter line	iMeLC	Blimp1-tdTomato, TFAP2C-EGFP	Transcriptome of amplified cDNA from PGCLC induction of Dox-inducible SOX17, GATA3 series, clone 2, harvested at iMeLC, non-sorted	MS168_37	YK_608	SG3_C2_I3_D1_iM_608	SG3.2.I3.D.iM	iMeLC	SG3_2	2	SG3	SG3	3	SG3OP	SG3_iMeLC			non
sample 126	126	MS168Y43	Dox-inducible SOX17, GATA3	Dox-inducible SOX17, GATA3, clone_2; day2, MS168Y43	day2, from 585B1 hiPSC BTAG reporter line	day2	Blimp1-tdTomato, TFAP2C-EGFP	Transcriptome of amplified cDNA from PGCLC induction of Dox-inducible SOX17, GATA3 series, clone 2, harvested at day2, BTAG-sorted	MS168_43	YK_614	SG3_C2_I3_D1_d2_614	SG3.2.I3.D.d2	day2	SG3_2	2	SG3	SG3	3	SG3OP	SG3_day2_D	D	Dox	BTAG
sample 132	132	MS168Y49	Dox-inducible SOX17, GATA3	Dox-inducible SOX17, GATA3, clone_2; day4, MS168Y49	day4, from 585B1 hiPSC BTAG reporter line	day4	Blimp1-tdTomato, TFAP2C-EGFP	Transcriptome of amplified cDNA from PGCLC induction of Dox-inducible SOX17, GATA3 series, clone 2, harvested at day4, BTAG-sorted	MS168_49	YK_620	SG3_C2_I3_D1_d4_620	SG3.2.I3.D.d4	day4	SG3_2	2	SG3	SG3	3	SG3OP	SG3_day4_D	D	Dox	BTAG
