# Supplementary material for: GATA transcription factors, SOX17 and TFAP2C, drive the human germ-cell specification program
Source: Life Sci Alliance. 2021 Feb 19;4(5):e202000974. doi: 10.26508/lsa.202000974 (PMC7918644; doi:10.26508/lsa.202000974)
Supplement: Supplementary file 3 [file LSA-2020-00974_TableS2.xlsx]

## Sheet: Inventory
Table 2
Inventory of spreadsheets
		Differentially expressed genes (DEGs) from the BMP-induced and Dox-induced cells in indicated lines were defined as follows: p<0.01 by Tukey-Kramer test and log2(RPM+1)>4 in the higher expression group, and having more than 2-fold changes of the mean expression values.
		Each spreadsheet contains: list of genes (left column) and results from DAVID (v6.8) website of enriched KEGG pathway (right top) and GO terms of biological processes (right bottom).
1		Genes up-regulated in BMP-induced compared to Dox-induced SOX17/TFAP2C/BLIMP1 cells at day 1
2		Genes up-regulated in Dox-induced compared to BMP-induced SOX17/TFAP2C/BLIMP1 cells at day 1
3		Genes up-regulated in BMP-induced compared to Dox-induced SOX17/TFAP2C/BLIMP1 cells at day 2
4		Genes up-regulated in Dox-induced compared to BMP-induced SOX17/TFAP2C/BLIMP1 cells at day 2
5		Genes up-regulated in BMP+Dox-induced compared to Dox-induced SOX17/TFAP2C cells at day 2
6		Genes up-regulated in Dox-induced compared to BMP+Dox-induced SOX17/TFAP2C cells at day 2
7		Genes up-regulated in BMP-induced compared to Dox-induced GATA3/SOX17/TFAP2C cells at day 2
8		Genes up-regulated in Dox-induced compared to BMP-induced GATA3/SOX17/TFAP2C cells at day 2
9		Genes up-regulated in BMP-induced compared to Dox-induced GATA3/SOX17/TFAP2C cells at day 4
10		Genes up-regulated in Dox-induced compared to BMP-induced GATA3/SOX17/TFAP2C cells at day 4
11		Genes up-regulated in BMP-induced compared to Dox-induced GATA3/SOX17/TFAP2C cells at day 6
12		Genes up-regulated in Dox-induced compared to BMP-induced GATA3/SOX17/TFAP2C cells at day 6

## Sheet: 1. SABd1 B>D
GATA3
TFAP2A		Category	Term	Count	%	PValue	Genes	List Total	Pop Hits	Pop Total	Fold Enrichment	Bonferroni	Benjamini	FDR
MSX1		KEGG_PATHWAY	hsa04550:Signaling pathways regulating pluripotency of stem cells	9	8.65385	1.58562e-06	WNT5B, HAND1, TBX3, ID2, DLX5, FZD1, ID3, ISL1, BMPR1A	43	140	6879	10.2842	0.00016172	0.00016172	0.00176648
EVX1		KEGG_PATHWAY	hsa04310:Wnt signaling pathway	5	4.80769	0.00961838	WNT5B, PLCB4, FZD1, LEF1, BAMBI	43	138	6879	5.79626	0.626868	0.389155	10.208
HAND1		KEGG_PATHWAY	hsa04390:Hippo signaling pathway	5	4.80769	0.0130743	WNT5B, ID2, FZD1, LEF1, BMPR1A	43	151	6879	5.29724	0.738774	0.360748	13.6376
HAPLN1		KEGG_PATHWAY	hsa04350:TGF-beta signaling pathway	4	3.84615	0.0143167	ID2, ID3, BAMBI, BMPR1A	43	84	6879	7.61794	0.770271	0.307685	14.8411
TBX3		KEGG_PATHWAY	hsa05166:HTLV-I infection	6	5.76923	0.0183974	MSX2, MSX1, WNT5B, RRAS2, POLE, FZD1	43	254	6879	3.77898	0.849533	0.315319	18.6874
NTS		KEGG_PATHWAY	hsa04916:Melanogenesis	4	3.84615	0.0227196	WNT5B, PLCB4, FZD1, LEF1	43	100	6879	6.39907	0.90407	0.323409	22.5883
WNT5B		KEGG_PATHWAY	hsa05205:Proteoglycans in cancer	5	4.80769	0.032812	WNT5B, RRAS2, FZD1, RDX, KDR	43	200	6879	3.99942	0.966725	0.385002	31.0426
TMEM54		KEGG_PATHWAY	hsa05217:Basal cell carcinoma	3	2.88462	0.0426397	WNT5B, FZD1, LEF1	43	54	6879	8.8876	0.988259	0.426265	38.4587
ISL1		KEGG_PATHWAY	hsa04925:Aldosterone synthesis and secretion	3	2.88462	0.0871646	PRKD1, PLCB4, PRKD3	43	81	6879	5.92506	0.999909	0.644275	63.7971
ATP12A
PRKD1		Category	Term	Count	%	PValue	Genes	List Total	Pop Hits	Pop Total	Fold Enrichment	Bonferroni	Benjamini	FDR
PRTG		GOTERM_BP_DIRECT	GO:0006366~transcription from RNA polymerase II promoter	14	13.4615	3.77272e-06	CDX2, LEF1, GRHL3, HMGA2, ISL1, PLSCR1, DLX2, MSX1, HAND1, EBF3, GATA3, DLX5, TFAP2A, RUNX3	92	513	16792	4.9811	0.0035476	0.0035476	0.00591521
RASSF9		GOTERM_BP_DIRECT	GO:0042475~odontogenesis of dentin-containing tooth	6	5.76923	1.1752e-05	DLX2, MSX1, HAND1, LEF1, LRP4, BMPR1A	92	55	16792	19.9115	0.0110094	0.00551994	0.0184248
MSX2		GOTERM_BP_DIRECT	GO:0060021~palate development	6	5.76923	5.70725e-05	MSX1, TBX3, DLX5, TFAP2A, LEF1, BMPR1A	92	76	16792	14.4096	0.0523441	0.0177616	0.0894485
AMIGO2		GOTERM_BP_DIRECT	GO:0045893~positive regulation of transcription, DNA-templated	12	11.5385	0.000104725	CDX2, TBX3, ID2, DLX5, GATA3, FZD1, TFAP2A, LEF1, BAMBI, HMGA2, HMGN5, RUNX3	92	515	16792	4.25293	0.0939462	0.0243625	0.164077
CA12		GOTERM_BP_DIRECT	GO:0000122~negative regulation of transcription from RNA polymerase II promoter	14	13.4615	0.000130036	CDX2, TBX3, LEF1, HMGA2, ISL1, MSX2, DLX2, MSX1, ID2, HAND1, GATA3, TFAP2A, ID3, RUNX3	92	720	16792	3.54903	0.115295	0.0242026	0.203693
DLX5		GOTERM_BP_DIRECT	GO:0043066~negative regulation of apoptotic process	11	10.5769	0.000174838	MSX2, AMIGO2, STIL, MSX1, TBX3, TFAP2A, LEF1, ASNS, HMGA2, HMGN5, KDR	92	455	16792	4.41261	0.151862	0.0270786	0.273783
LOC648987		GOTERM_BP_DIRECT	GO:0061312~BMP signaling pathway involved in heart development	3	2.88462	0.000429586	MSX2, MSX1, BMPR1A	92	6	16792	91.2609	0.332861	0.0561825	0.671444
CDX2		GOTERM_BP_DIRECT	GO:0021983~pituitary gland development	4	3.84615	0.000457229	MSX1, ISL1, HMGA2, BMPR1A	92	28	16792	26.0745	0.350017	0.0524268	0.714506
SEZ6L		GOTERM_BP_DIRECT	GO:0030335~positive regulation of cell migration	7	6.73077	0.000491843	WNT5B, ARHGEF39, F3, RRAS2, LEF1, RDX, KDR	92	184	16792	6.94376	0.370878	0.050189	0.768401
EFHD1		GOTERM_BP_DIRECT	GO:0035115~embryonic forelimb morphogenesis	4	3.84615	0.000681505	MSX2, MSX1, TBX3, TFAP2A	92	32	16792	22.8152	0.473865	0.062201	1.06323
CLDN10		GOTERM_BP_DIRECT	GO:0045944~positive regulation of transcription from RNA polymerase II promoter	15	14.4231	0.000778405	EVX1, LEF1, GRHL3, HMGA2, ISL1, PRKD1, PLSCR1, DLX2, MSX1, SENP1, HAND1, EBF3, GATA3, TFAP2A, BMPR1A	92	981	16792	2.79085	0.519795	0.0645108	1.21354
GRHL3		GOTERM_BP_DIRECT	GO:0002062~chondrocyte differentiation	4	3.84615	0.00122179	WNT5B, HMGA2, RUNX3, BMPR1A	92	39	16792	18.7202	0.683879	0.0915079	1.8986
RUNX3		GOTERM_BP_DIRECT	GO:0045892~negative regulation of transcription, DNA-templated	10	9.61538	0.00152106	MSX2, HAND1, TBX3, ID2, GATA3, FZD1, TFAP2A, LEF1, ID3, HMGA2	92	499	16792	3.65775	0.76163	0.104437	2.35848
EBF3		GOTERM_BP_DIRECT	GO:0003151~outflow tract morphogenesis	4	3.84615	0.00197469	TBX3, FZD1, ISL1, BMPR1A	92	46	16792	15.8715	0.844637	0.124535	3.05171
LEF1		GOTERM_BP_DIRECT	GO:0003215~cardiac right ventricle morphogenesis	3	2.88462	0.00217932	GATA3, ISL1, BMPR1A	92	13	16792	42.1204	0.871928	0.128039	3.36292
HEG1		GOTERM_BP_DIRECT	GO:0010628~positive regulation of gene expression	7	6.73077	0.00300392	PLSCR1, ID2, TFAP2A, LEF1, RDX, HMGA2, HMGN5	92	262	16792	4.87654	0.94122	0.162323	4.60753
MCOLN3		GOTERM_BP_DIRECT	GO:0001701~in utero embryonic development	6	5.76923	0.00348593	STIL, MSX1, TBX3, GATA3, HEG1, BMPR1A	92	187	16792	5.85631	0.962727	0.175929	5.32807
CGN		GOTERM_BP_DIRECT	GO:0008284~positive regulation of cell proliferation	9	8.65385	0.00376589	CDX2, TBX3, TIPIN, SP6, LEF1, ISL1, BAMBI, HMGN5, KDR	92	466	16792	3.5251	0.971395	0.179182	5.74424
B2M		GOTERM_BP_DIRECT	GO:0090398~cellular senescence	3	2.88462	0.00682447	TBX3, ID2, H2AFX	92	23	16792	23.8072	0.998421	0.287881	10.1807
SLC16A12		GOTERM_BP_DIRECT	GO:0003148~outflow tract septum morphogenesis	3	2.88462	0.00682447	MSX2, ISL1, BMPR1A	92	23	16792	23.8072	0.998421	0.287881	10.1807
CD1D		GOTERM_BP_DIRECT	GO:0030509~BMP signaling pathway	4	3.84615	0.00813813	DLX5, LEF1, LRP4, BMPR1A	92	76	16792	9.60641	0.999546	0.319464	12.0255
HOXD1		GOTERM_BP_DIRECT	GO:0048863~stem cell differentiation	3	2.88462	0.00933601	MSX2, MSX1, HMGA2	92	27	16792	20.2802	0.999855	0.343448	13.6767
F3		GOTERM_BP_DIRECT	GO:0035116~embryonic hindlimb morphogenesis	3	2.88462	0.010019	MSX2, MSX1, TBX3	92	28	16792	19.5559	0.999924	0.350244	14.6051
DLX2		GOTERM_BP_DIRECT	GO:0001707~mesoderm formation	3	2.88462	0.010019	HAND1, WLS, BMPR1A	92	28	16792	19.5559	0.999924	0.350244	14.6051
WLS		GOTERM_BP_DIRECT	GO:0043392~negative regulation of DNA binding	3	2.88462	0.010019	ID2, LEF1, HMGA2	92	28	16792	19.5559	0.999924	0.350244	14.6051
TPD52		GOTERM_BP_DIRECT	GO:2001055~positive regulation of mesenchymal cell apoptotic process	2	1.92308	0.0108094	MSX2, MSX1	92	2	16792	182.522	0.999964	0.359257	15.6679
PCAT14		GOTERM_BP_DIRECT	GO:0090427~activation of meiosis	2	1.92308	0.0108094	MSX2, MSX1	92	2	16792	182.522	0.999964	0.359257	15.6679
SP6		GOTERM_BP_DIRECT	GO:0071773~cellular response to BMP stimulus	3	2.88462	0.0114493	DLX5, GATA3, BMPR1A	92	30	16792	18.2522	0.999981	0.363632	16.5192
NDRG2		GOTERM_BP_DIRECT	GO:0060325~face morphogenesis	3	2.88462	0.0114493	MSX1, DLX5, LEF1	92	30	16792	18.2522	0.999981	0.363632	16.5192
FZD1		GOTERM_BP_DIRECT	GO:0090090~negative regulation of canonical Wnt signaling pathway	5	4.80769	0.0118991	WNT5B, FZD1, LEF1, ISL1, LRP4	92	163	16792	5.59883	0.999987	0.363039	17.1128
LRP4		GOTERM_BP_DIRECT	GO:0030901~midbrain development	3	2.88462	0.0121962	MSX1, WLS, DLG5	92	31	16792	17.6634	0.99999	0.358915	17.5026
KDR		GOTERM_BP_DIRECT	GO:0030182~neuron differentiation	4	3.84615	0.0148887	WNT5B, FZD1, HOXD1, ID3	92	95	16792	7.68513	0.999999	0.407472	20.9588
PRSS12		GOTERM_BP_DIRECT	GO:0035880~embryonic nail plate morphogenesis	2	1.92308	0.0161708	MSX2, MSX1	92	3	16792	121.681	1	0.422171	22.5563
HNMT		GOTERM_BP_DIRECT	GO:0060368~regulation of Fc receptor mediated stimulatory signaling pathway	2	1.92308	0.0161708	PLSCR1, CSK	92	3	16792	121.681	1	0.422171	22.5563
STIL		GOTERM_BP_DIRECT	GO:0089700~protein kinase D signaling	2	1.92308	0.0161708	PRKD1, PRKD3	92	3	16792	121.681	1	0.422171	22.5563
ID2		GOTERM_BP_DIRECT	GO:0016055~Wnt signaling pathway	5	4.80769	0.0187911	WNT5B, LEF1, NDRG2, WLS, LRP4	92	187	16792	4.88026	1	0.460004	25.728
ID3		GOTERM_BP_DIRECT	GO:0001649~osteoblast differentiation	4	3.84615	0.0189207	MSX2, RRAS2, DLX5, LEF1	92	104	16792	7.02007	1	0.45108	25.8817
BAMBI		GOTERM_BP_DIRECT	GO:0021559~trigeminal nerve development	2	1.92308	0.0215033	TFAP2A, ISL1	92	4	16792	91.2609	1	0.483433	28.8825
PLSCR1		GOTERM_BP_DIRECT	GO:0042481~regulation of odontogenesis	2	1.92308	0.0215033	MSX1, SP6	92	4	16792	91.2609	1	0.483433	28.8825
ART5		GOTERM_BP_DIRECT	GO:0007275~multicellular organism development	8	7.69231	0.0229724	CDX2, WNT5B, ID2, EBF3, PRTG, CENPE, ID3, HMGA2	92	521	16792	2.80264	1	0.495475	30.5383
IGSF8		GOTERM_BP_DIRECT	GO:0045766~positive regulation of angiogenesis	4	3.84615	0.0245919	PRKD1, F3, ISL1, KDR	92	115	16792	6.34858	1	0.508731	32.3218
LOC645321		GOTERM_BP_DIRECT	GO:0010595~positive regulation of endothelial cell migration	3	2.88462	0.0257624	PRKD1, GATA3, KDR	92	46	16792	11.9036	1	0.514767	33.584
FABP5		GOTERM_BP_DIRECT	GO:0038033~positive regulation of endothelial cell chemotaxis by VEGF-activated vascular endothelial growth factor receptor signaling pathway	2	1.92308	0.0268073	PRKD1, KDR	92	5	16792	73.0087	1	0.518739	34.6922
DCBLD1		GOTERM_BP_DIRECT	GO:0007417~central nervous system development	4	3.84615	0.0274407	HAPLN1, GRHL3, ID3, CSK	92	120	16792	6.08406	1	0.517159	35.3554
TCERG1L		GOTERM_BP_DIRECT	GO:0060536~cartilage morphogenesis	2	1.92308	0.0320828	MSX1, HAND1	92	6	16792	60.8406	1	0.564039	40.0276
TPST2		GOTERM_BP_DIRECT	GO:0071281~cellular response to iron ion	2	1.92308	0.0320828	TFAP2A, B2M	92	6	16792	60.8406	1	0.564039	40.0276
SMIM14		GOTERM_BP_DIRECT	GO:0042472~inner ear morphogenesis	3	2.88462	0.0323251	DLX5, GATA3, TFAP2A	92	52	16792	10.5301	1	0.557166	40.2625
PCED1B		GOTERM_BP_DIRECT	GO:0042733~embryonic digit morphogenesis	3	2.88462	0.0370252	TBX3, LRP4, BMPR1A	92	56	16792	9.77795	1	0.597989	44.6532
PLCB4		GOTERM_BP_DIRECT	GO:0045669~positive regulation of osteoblast differentiation	3	2.88462	0.0419701	PRKD1, MSX2, BMPR1A	92	60	16792	9.12609	1	0.635685	48.9453
GALNT13		GOTERM_BP_DIRECT	GO:0043433~negative regulation of sequence-specific DNA binding transcription factor activity	3	2.88462	0.0419701	HAND1, ID2, ID3	92	60	16792	9.12609	1	0.635685	48.9453
BMPR1A		GOTERM_BP_DIRECT	GO:0048762~mesenchymal cell differentiation	2	1.92308	0.0425492	ISL1, HMGA2	92	8	16792	45.6304	1	0.631753	49.4271
STEAP3		GOTERM_BP_DIRECT	GO:0001947~heart looping	3	2.88462	0.0432431	STIL, HAND1, TBX3	92	61	16792	8.97648	1	0.628972	49.9987
GNB4		GOTERM_BP_DIRECT	GO:0030071~regulation of mitotic metaphase/anaphase transition	2	1.92308	0.0477404	CENPE, UBE2C	92	9	16792	40.5604	1	0.657552	53.5594
PLEKHG6		GOTERM_BP_DIRECT	GO:0030903~notochord development	2	1.92308	0.0477404	STIL, ID3	92	9	16792	40.5604	1	0.657552	53.5594
HMGA2		GOTERM_BP_DIRECT	GO:0006260~DNA replication	4	3.84615	0.052041	MCM9, POLE, TIPIN, CHAF1B	92	155	16792	4.71024	1	0.681518	56.7412
CENPE		GOTERM_BP_DIRECT	GO:0003149~membranous septum morphogenesis	2	1.92308	0.0529037	ID2, FZD1	92	10	16792	36.5043	1	0.679483	57.3543
ARHGEF19		GOTERM_BP_DIRECT	GO:0001938~positive regulation of endothelial cell proliferation	3	2.88462	0.0539276	PRKD1, F3, KDR	92	69	16792	7.93573	1	0.678654	58.0715
HMGN5		GOTERM_BP_DIRECT	GO:0030855~epithelial cell differentiation	3	2.88462	0.0553229	DLX5, FZD1, ID3	92	70	16792	7.82236	1	0.680393	59.0306
PHLPP2		GOTERM_BP_DIRECT	GO:0045176~apical protein localization	2	1.92308	0.0580393	RDX, DLG5	92	11	16792	33.1858	1	0.69069	60.8393
SEL1L3		GOTERM_BP_DIRECT	GO:0048715~negative regulation of oligodendrocyte differentiation	2	1.92308	0.0580393	DLX2, ID2	92	11	16792	33.1858	1	0.69069	60.8393
NIPA1		GOTERM_BP_DIRECT	GO:0048646~anatomical structure formation involved in morphogenesis	2	1.92308	0.0580393	DLX5, GATA3	92	11	16792	33.1858	1	0.69069	60.8393
CMPK1		GOTERM_BP_DIRECT	GO:0050927~positive regulation of positive chemotaxis	2	1.92308	0.0580393	F3, KDR	92	11	16792	33.1858	1	0.69069	60.8393
ENOSF1		GOTERM_BP_DIRECT	GO:0000724~double-strand break repair via homologous recombination	3	2.88462	0.0610294	MCM9, GEN1, H2AFX	92	74	16792	7.39953	1	0.701978	62.7436
TMEM243		GOTERM_BP_DIRECT	GO:0060444~branching involved in mammary gland duct morphogenesis	2	1.92308	0.0631473	MSX2, TBX3	92	12	16792	30.4203	1	0.707391	64.0396
ARHGEF39		GOTERM_BP_DIRECT	GO:0051382~kinetochore assembly	2	1.92308	0.0631473	CENPA, CENPE	92	12	16792	30.4203	1	0.707391	64.0396
GPX7		GOTERM_BP_DIRECT	GO:2000648~positive regulation of stem cell proliferation	2	1.92308	0.0631473	TBX3, HMGA2	92	12	16792	30.4203	1	0.707391	64.0396
CSK		GOTERM_BP_DIRECT	GO:0090179~planar cell polarity pathway involved in neural tube closure	2	1.92308	0.0631473	FZD1, GRHL3	92	12	16792	30.4203	1	0.707391	64.0396
SHMT1		GOTERM_BP_DIRECT	GO:0008285~negative regulation of cell proliferation	6	5.76923	0.0639789	MSX2, MSX1, GATA3, TFAP2A, DLG5, CSK	92	396	16792	2.76548	1	0.705131	64.5369
RDX		GOTERM_BP_DIRECT	GO:0001829~trophectodermal cell differentiation	2	1.92308	0.068228	CDX2, HAND1	92	13	16792	28.0803	1	0.722008	66.9786
ASNS		GOTERM_BP_DIRECT	GO:0061029~eyelid development in camera-type eye	2	1.92308	0.068228	TFAP2A, GRHL3	92	13	16792	28.0803	1	0.722008	66.9786
MCM9		GOTERM_BP_DIRECT	GO:0007398~ectoderm development	2	1.92308	0.068228	GRHL3, BMPR1A	92	13	16792	28.0803	1	0.722008	66.9786
CHAF1B		GOTERM_BP_DIRECT	GO:0045197~establishment or maintenance of epithelial cell apical/basal polarity	2	1.92308	0.068228	CDX2, DLG5	92	13	16792	28.0803	1	0.722008	66.9786
DLG5		GOTERM_BP_DIRECT	GO:0003198~epithelial to mesenchymal transition involved in endocardial cushion formation	2	1.92308	0.068228	MSX2, MSX1	92	13	16792	28.0803	1	0.722008	66.9786
PRKD3		GOTERM_BP_DIRECT	GO:0042060~wound healing	3	2.88462	0.0699458	WNT5B, ARHGEF19, GRHL3	92	80	16792	6.84457	1	0.7244	67.9203
TOE1		GOTERM_BP_DIRECT	GO:0035023~regulation of Rho protein signal transduction	3	2.88462	0.0714713	ARHGEF39, PLEKHG6, ARHGEF19	92	81	16792	6.76006	1	0.725712	68.7355
TMEM39B		GOTERM_BP_DIRECT	GO:2000678~negative regulation of transcription regulatory region DNA binding	2	1.92308	0.0732814	MSX2, MSX1	92	14	16792	26.0745	1	0.728414	69.6776
DEDD		GOTERM_BP_DIRECT	GO:0007507~heart development	4	3.84615	0.0772697	HAND1, GATA3, HEG1, ID3	92	183	16792	3.98955	1	0.741472	71.6603
GEN1		GOTERM_BP_DIRECT	GO:2000679~positive regulation of transcription regulatory region DNA binding	2	1.92308	0.0783077	GATA3, HMGA2	92	15	16792	24.3362	1	0.740142	72.1561
CENPA		GOTERM_BP_DIRECT	GO:0060441~epithelial tube branching involved in lung morphogenesis	2	1.92308	0.0783077	DLG5, HMGA2	92	15	16792	24.3362	1	0.740142	72.1561
ARF6		GOTERM_BP_DIRECT	GO:0001822~kidney development	3	2.88462	0.0792584	GATA3, TFAP2A, LRP4	92	86	16792	6.36704	1	0.738454	72.603
SENP1		GOTERM_BP_DIRECT	GO:0003222~ventricular trabecula myocardium morphogenesis	2	1.92308	0.0833071	HEG1, BMPR1A	92	16	16792	22.8152	1	0.750619	74.4321
ACTL6A		GOTERM_BP_DIRECT	GO:0035162~embryonic hemopoiesis	2	1.92308	0.0833071	GATA3, KDR	92	16	16792	22.8152	1	0.750619	74.4321
TIPIN		GOTERM_BP_DIRECT	GO:0003203~endocardial cushion morphogenesis	2	1.92308	0.0833071	ISL1, BMPR1A	92	16	16792	22.8152	1	0.750619	74.4321
TUBGCP3		GOTERM_BP_DIRECT	GO:0048568~embryonic organ development	2	1.92308	0.0882796	POLE, BMPR1A	92	17	16792	21.4731	1	0.76567	76.5222
H2AFX		GOTERM_BP_DIRECT	GO:0009948~anterior/posterior axis specification	2	1.92308	0.0882796	CDX2, WLS	92	17	16792	21.4731	1	0.76567	76.5222
RRAS2		GOTERM_BP_DIRECT	GO:0009887~organ morphogenesis	3	2.88462	0.0889333	CDX2, TBX3, GATA3	92	92	16792	5.9518	1	0.762672	76.7848
UBE2C		GOTERM_BP_DIRECT	GO:0007179~transforming growth factor beta receptor signaling pathway	3	2.88462	0.0889333	CGN, BAMBI, BMPR1A	92	92	16792	5.9518	1	0.762672	76.7848
KIF20A		GOTERM_BP_DIRECT	GO:0045089~positive regulation of innate immune response	2	1.92308	0.0932254	PLSCR1, CD1D	92	18	16792	20.2802	1	0.773919	78.4416
MFSD5		GOTERM_BP_DIRECT	GO:0060037~pharyngeal system development	2	1.92308	0.0932254	GATA3, ISL1	92	18	16792	20.2802	1	0.773919	78.4416
LMNB2		GOTERM_BP_DIRECT	GO:0021772~olfactory bulb development	2	1.92308	0.0981447	DLX2, ID2	92	19	16792	19.2128	1	0.786603	80.2042
POLE		GOTERM_BP_DIRECT	GO:0023019~signal transduction involved in regulation of gene expression	2	1.92308	0.0981447	MSX2, MSX1	92	19	16792	19.2128	1	0.786603	80.2042
		GOTERM_BP_DIRECT	GO:0051298~centrosome duplication	2	1.92308	0.0981447	STIL, TUBGCP3	92	19	16792	19.2128	1	0.786603	80.2042

## Sheet: 2. SABd1 D>B
RBGpA
H19		Category	Term	Count	%	PValue	Genes	List Total	Pop Hits	Pop Total	Fold Enrichment	Bonferroni	Benjamini	FDR
DLL1		KEGG_PATHWAY	hsa04151:PI3K-Akt signaling pathway	7	5.30303	0.037672	COL4A2, PDGFB, GYS1, CREB3L1, GNG3, FOXO3, IL3RA	51	345	6879	2.73674	0.987444	0.987444	35.384
GSTA1		KEGG_PATHWAY	hsa04931:Insulin resistance	4	3.0303	0.0433139	GYS1, CREB3L1, TRIB3, PYGB	51	108	6879	4.99564	0.993577	0.919858	39.5637
COL14A1
RASD1		Category	Term	Count	%	PValue	Genes	List Total	Pop Hits	Pop Total	Fold Enrichment	Bonferroni	Benjamini	FDR
PDGFB		GOTERM_BP_DIRECT	GO:0071333~cellular response to glucose stimulus	6	4.54545	3.40607e-05	SLC29A1, SERPINF1, LGALS1, FOXO3, AACS, GAS6	121	52	16792	16.0127	0.0297605	0.0297605	0.052979
FRY		GOTERM_BP_DIRECT	GO:0010976~positive regulation of neuron projection development	5	3.78788	0.0037953	RGMA, RET, SERPINF1, NDRG4, CNR1	121	89	16792	7.79645	0.965708	0.814818	5.74442
ADAM28		GOTERM_BP_DIRECT	GO:0006139~nucleobase-containing compound metabolic process	4	3.0303	0.00516187	SLC29A1, SLC23A2, CRMP1, UPP1	121	49	16792	11.3287	0.989852	0.783496	7.73609
F12		GOTERM_BP_DIRECT	GO:0016337~single organismal cell-cell adhesion	5	3.78788	0.00594521	NRCAM, ARVCF, COL14A1, LIMS2, DSP	121	101	16792	6.87014	0.994954	0.733475	8.85992
SLC4A11		GOTERM_BP_DIRECT	GO:0098869~cellular oxidant detoxification	4	3.0303	0.0137652	GSTA1, GPX2, PXDN, TP53INP1	121	70	16792	7.93011	0.999995	0.914472	19.3982
ADAMTS2		GOTERM_BP_DIRECT	GO:0016485~protein processing	4	3.0303	0.0148444	F12, UQCRC1, ECE1, ADAMTS2	121	72	16792	7.70983	0.999998	0.890404	20.7595
GNG3		GOTERM_BP_DIRECT	GO:0033159~negative regulation of protein import into nucleus, translocation	2	1.51515	0.0212872	PDE2A, GAS6	121	3	16792	92.5179	1	0.934553	28.4494
HHIPL1		GOTERM_BP_DIRECT	GO:0003104~positive regulation of glomerular filtration	2	1.51515	0.0282826	PDGFB, GAS6	121	4	16792	69.3884	1	0.958457	36.0051
IL3RA		GOTERM_BP_DIRECT	GO:0000045~autophagosome assembly	3	2.27273	0.0346462	GABARAPL1, TP53INP2, TP53INP1	121	41	16792	10.1544	1	0.969042	42.2236
GPX2		GOTERM_BP_DIRECT	GO:0070374~positive regulation of ERK1 and ERK2 cascade	5	3.78788	0.0368894	PDGFB, NDRG4, CX3CL1, NPY5R, GAS6	121	175	16792	3.96505	1	0.964349	44.2774
NPY5R		GOTERM_BP_DIRECT	GO:0030155~regulation of cell adhesion	3	2.27273	0.0378042	RET, JAG2, DLL1	121	43	16792	9.68211	1	0.955288	45.0952
SOX15		GOTERM_BP_DIRECT	GO:0001755~neural crest cell migration	3	2.27273	0.0410679	RET, SEMA3G, SEMA4A	121	45	16792	9.25179	1	0.954937	47.9222
JAG2		GOTERM_BP_DIRECT	GO:0032229~negative regulation of synaptic transmission, GABAergic	2	1.51515	0.0421249	STXBP1, NPY5R	121	6	16792	46.259	1	0.94695	48.8082
S100A4		GOTERM_BP_DIRECT	GO:0071560~cellular response to transforming growth factor beta stimulus	3	2.27273	0.0478982	COL4A2, PDE2A, EPB41L5	121	49	16792	8.49654	1	0.955389	53.4036
BIK		GOTERM_BP_DIRECT	GO:0030198~extracellular matrix organization	5	3.78788	0.0520947	COL4A2, PXDN, COL14A1, PDGFB, NID2	121	196	16792	3.54023	1	0.95773	56.4984
ATCAY		GOTERM_BP_DIRECT	GO:0043065~positive regulation of apoptotic process	6	4.54545	0.0641538	NGEF, SQSTM1, CNR1, CLIP3, FOXO3, FGD4	121	300	16792	2.77554	1	0.974669	64.3553
CEND1		GOTERM_BP_DIRECT	GO:0060041~retina development in camera-type eye	3	2.27273	0.0646181	RET, SERPINF1, DLL1	121	58	16792	7.17811	1	0.969359	64.6295
SH3BP5		GOTERM_BP_DIRECT	GO:0006950~response to stress	3	2.27273	0.0705684	NDRG4, SQSTM1, TP53INP1	121	61	16792	6.82509	1	0.972847	67.9726
GPHA2		GOTERM_BP_DIRECT	GO:0016525~negative regulation of angiogenesis	3	2.27273	0.0725904	COL4A2, SERPINF1, SEMA4A	121	62	16792	6.71501	1	0.970345	69.0396
LPIN1		GOTERM_BP_DIRECT	GO:0000122~negative regulation of transcription from RNA polymerase II promoter	10	7.57576	0.0728383	MAF, PDE2A, SQSTM1, H2AFY, SOX15, TRIB3, FOXO3, TAGLN3, DNAJB5, MXD4	121	720	16792	1.92746	1	0.965058	69.1681
NSG1		GOTERM_BP_DIRECT	GO:0006600~creatine metabolic process	2	1.51515	0.0758812	SLC6A8, CKB	121	11	16792	25.2322	1	0.964321	70.7054
NID2		GOTERM_BP_DIRECT	GO:0035690~cellular response to drug	3	2.27273	0.0872463	PDE2A, KCNH2, GAS6	121	69	16792	6.03378	1	0.974793	75.8356
NACAD		GOTERM_BP_DIRECT	GO:0048268~clathrin coat assembly	2	1.51515	0.089051	SNAP91, NSG1	121	13	16792	21.3503	1	0.972592	76.5684
PID1		GOTERM_BP_DIRECT	GO:0006119~oxidative phosphorylation	2	1.51515	0.089051	UQCRC1, ATP5C1	121	13	16792	21.3503	1	0.972592	76.5684
GDPD5		GOTERM_BP_DIRECT	GO:0070986~left/right axis specification	2	1.51515	0.089051	EPB41L5, DLL1	121	13	16792	21.3503	1	0.972592	76.5684
RAMP1		GOTERM_BP_DIRECT	GO:0001921~positive regulation of receptor recycling	2	1.51515	0.0955659	ECE1, NSG1	121	14	16792	19.8253	1	0.975579	79.0441
MYRF		GOTERM_BP_DIRECT	GO:0035725~sodium ion transmembrane transport	3	2.27273	0.0959849	SLC4A11, SLC6A8, SLC23A2	121	73	16792	5.70316	1	0.972132	79.1947
GPR153
RET
SYTL5
NDRG4
KCNH2
TAGLN3
SEMA3G
PDE2A
SNAP91
SCG5
FAM43A
CLIP3
GAS6
CNR1
PCBP4
MAF
CREB3L1
SERPINF1
SEMA4A
PPP1R16B
C14orf37
FGD4
DUSP14
ENO2
CX3CL1
TP53INP1
LOC105369499
MEGF6
SMOX
LGALS1
GUCA1A
SSC4D
CDYL2
SLC16A10
STXBP1
NGEF
TCF7L1
PYGB
2020-09-03
FAM46A
MAP1A
NRCAM
TUBB3
KRT19
SLC6A8
LOC105369633
DSP
TRIB3
LIMS2
FAM19A5
CKB
AACS
PVR
GPR176
RGMA
MXD4
SLC23A2
COL23A1
KDM4B
SLC29A1
PLEKHH1
CRMP1
COL4A2
PQLC3
TP53INP2
UPP1
NYNRIN
MYLIP
MXRA8
LZTS3
CELF2
ECE1
FLNB
KIF1A
DNAJB5
DNAJC4
REC8
FOXO3
ARVCF
ENTPD6
ARL2BP
DOCK6
EPB41L5
GYS1
SQSTM1
MICAL1
PXDN
TERF2IP
SLC25A35
HEATR5B
DENND5B
TTC28
KIAA1671
HDHD1
AP1B1
UQCRC1
UBE2H
ATP5C1
PLSCR3
GABARAPL1
H2AFY
RP9
TULP3

## Sheet: 3. SABd2 B>D
WNT5B		Category	Term	Count	%	PValue	Genes	List Total	Pop Hits	Pop Total	Fold Enrichment	Bonferroni	Benjamini	FDR
TFAP2A		KEGG_PATHWAY	hsa04550:Signaling pathways regulating pluripotency of stem cells	4	5.47945	0.0186355	FZD10, WNT5B, HAND1, IL6ST	29	140	6879	6.77734	0.751431	0.751431	17.8721
DMRTA2		KEGG_PATHWAY	hsa01200:Carbon metabolism	3	4.10959	0.076666	SHMT1, HK1, PRPS2	29	113	6879	6.29753	0.997268	0.947727	56.6068
HAND1
CDX2		Category	Term	Count	%	PValue	Genes	List Total	Pop Hits	Pop Total	Fold Enrichment	Bonferroni	Benjamini	FDR
DLX2		GOTERM_BP_DIRECT	GO:0030182~neuron differentiation	4	5.47945	0.00521216	FZD10, WNT5B, TRPC5, HOXD1	63	95	16792	11.2227	0.944994	0.944994	7.35148
CRHBP		GOTERM_BP_DIRECT	GO:0043066~negative regulation of apoptotic process	7	9.58904	0.00654026	MSX2, AMIGO2, ACTC1, IL6ST, TFAP2A, ASNS, GRK5	63	455	16792	4.10061	0.973794	0.838117	9.14248
HAPLN1		GOTERM_BP_DIRECT	GO:0042475~odontogenesis of dentin-containing tooth	3	4.10959	0.0175685	DLX2, HAND1, LRP4	63	55	16792	14.5385	0.999947	0.962336	22.8166
HOXD1		GOTERM_BP_DIRECT	GO:0008284~positive regulation of cell proliferation	6	8.21918	0.028594	CDX2, NTF3, TRPC5, IL6ST, GRK5, BAMBI	63	466	16792	3.43184	1	0.982141	34.5506
NANOS3		GOTERM_BP_DIRECT	GO:0007217~tachykinin receptor signaling pathway	2	2.73973	0.029165	GRK5, TAC3	63	8	16792	66.6349	1	0.962577	35.1105
MSX2		GOTERM_BP_DIRECT	GO:0006366~transcription from RNA polymerase II promoter	6	8.21918	0.0406697	DLX2, CDX2, HAND1, TFAP2A, GRHL3, RUNX3	63	513	16792	3.11742	1	0.978519	45.4838
PCAT14		GOTERM_BP_DIRECT	GO:0001829~trophectodermal cell differentiation	2	2.73973	0.0469664	CDX2, HAND1	63	13	16792	41.0061	1	0.977941	50.4849
FZD10		GOTERM_BP_DIRECT	GO:0061029~eyelid development in camera-type eye	2	2.73973	0.0469664	TFAP2A, GRHL3	63	13	16792	41.0061	1	0.977941	50.4849
PYDC1		GOTERM_BP_DIRECT	GO:0009116~nucleoside metabolic process	2	2.73973	0.0679045	PNP, PRPS2	63	19	16792	28.0568	1	0.992391	64.2095
NTF3		GOTERM_BP_DIRECT	GO:0009954~proximal/distal pattern formation	2	2.73973	0.0850067	DLX2, LRP4	63	24	16792	22.2116	1	0.995824	72.6943
RNASE4		GOTERM_BP_DIRECT	GO:0032148~activation of protein kinase B activity	2	2.73973	0.0917609	NTF3, ANG	63	26	16792	20.5031	1	0.995212	75.4959
ATP12A		GOTERM_BP_DIRECT	GO:0009755~hormone-mediated signaling pathway	2	2.73973	0.0984659	CRHBP, TRH	63	28	16792	19.0385	1	0.994646	78.0104
RUNX3
KCNMB1
NKX1-2
TRH
PRKAR2B
TMEM229A
MUM1L1
CA12
ACTC1
DOCK2
PDPN
PRSS12
VSTM2A
LOC728715
TMEM54
AMIGO2
TCERG1L
LOC101930452
GRHL3
ANG
TRPC5
PIFO
DDIT4L
CLDN10
DEPDC7
GRK5
LRP4
PLBD1
PRPS2
IL6ST
MANEAL
PCED1B
TAC3
BAMBI
PNP
FAM155A
RNF217
ST6GALNAC3
C8orf88
DMD
HK1
GRIP2
CDC14B
LAMC1
CALCOCO2
FNDC3A
FAM169A
S100A11
SHMT1
ASNS
ADGRA3
PPP1R3B
B3GNT2
KIF5B
ELOVL6
PRDX4

## Sheet: 4. SABd2 D>B
TCF7L1		Category	Term	Count	%	PValue	Genes	List Total	Pop Hits	Pop Total	Fold Enrichment	Bonferroni	Benjamini	FDR
HHEX		KEGG_PATHWAY	hsa05217:Basal cell carcinoma	2	7.69231	0.0685102	FZD5, TCF7L1	10	54	6879	25.4778	0.922302	0.922302	46.9004
NRP1
CHODL		Category	Term	Count	%	PValue	Genes	List Total	Pop Hits	Pop Total	Fold Enrichment	Bonferroni	Benjamini	FDR
LEFTY1		GOTERM_BP_DIRECT	GO:0008595~anterior/posterior axis specification, embryo	2	7.69231	0.00996374	TDGF1, FZD5	25	7	16792	191.909	0.944644	0.944644	12.458
FZD5		GOTERM_BP_DIRECT	GO:0035729~cellular response to hepatocyte growth factor stimulus	2	7.69231	0.0198323	NRP1, TDGF1	25	14	16792	95.9543	0.996939	0.944677	23.3682
DACT2		GOTERM_BP_DIRECT	GO:0002042~cell migration involved in sprouting angiogenesis	2	7.69231	0.0212344	NRP1, TDGF1	25	15	16792	89.5573	0.997976	0.873512	24.8119
TRABD2B		GOTERM_BP_DIRECT	GO:0010596~negative regulation of endothelial cell migration	2	7.69231	0.0254291	SERPINF1, STC1	25	18	16792	74.6311	0.999415	0.844485	28.9825
BCAT2		GOTERM_BP_DIRECT	GO:0060716~labyrinthine layer blood vessel development	2	7.69231	0.0268235	PLCD1, FZD5	25	19	16792	70.7032	0.999613	0.792281	30.3207
TMEM132B		GOTERM_BP_DIRECT	GO:0030111~regulation of Wnt signaling pathway	2	7.69231	0.0268235	DACT2, TCF7L1	25	19	16792	70.7032	0.999613	0.792281	30.3207
ADGRG2		GOTERM_BP_DIRECT	GO:0016055~Wnt signaling pathway	3	11.5385	0.0289937	HHEX, TRABD2B, TCF7L1	25	187	16792	10.7756	0.999797	0.757602	32.3573
STC1		GOTERM_BP_DIRECT	GO:0016358~dendrite development	2	7.69231	0.0392874	NRP1, DAB1	25	28	16792	47.9771	0.999991	0.808856	41.2887
DAB1		GOTERM_BP_DIRECT	GO:0001525~angiogenesis	3	11.5385	0.0400067	NRP1, PLCD1, FZD5	25	223	16792	9.03605	0.999992	0.771209	41.8701
GPR176		GOTERM_BP_DIRECT	GO:0007162~negative regulation of cell adhesion	2	7.69231	0.0515982	DAB1, DACT2	25	37	16792	36.307	1	0.817527	50.5347
RGMA		GOTERM_BP_DIRECT	GO:0010595~positive regulation of endothelial cell migration	2	7.69231	0.0637577	NRP1, TDGF1	25	46	16792	29.2035	1	0.851023	58.3285
TDGF1		GOTERM_BP_DIRECT	GO:0016525~negative regulation of angiogenesis	2	7.69231	0.0850067	HHEX, SERPINF1	25	62	16792	21.6671	1	0.903096	69.284
CELF2		GOTERM_BP_DIRECT	GO:0009611~response to wounding	2	7.69231	0.0863194	HHEX, NRP1	25	63	16792	21.3232	1	0.88629	69.8644
SERPINF1
PLCD1
TRIB1
LPIN2
TAGLN
DUSP16
DENND5B
DNAJB5
CAPN1

## Sheet: 5. SAd2 BD>D
GATA3
CRHBP		Category	Term	Count	%	PValue	Genes	List Total	Pop Hits	Pop Total	Fold Enrichment	Bonferroni	Benjamini	FDR
POSTN		KEGG_PATHWAY	hsa05414:Dilated cardiomyopathy	6	2.76498	0.00406481	ITGA9, ADCY1, ACTC1, SGCG, IGF1, CACNA2D2	88	84	6879	5.5836	0.427655	0.427655	4.67478
HAPLN1		KEGG_PATHWAY	hsa04550:Signaling pathways regulating pluripotency of stem cells	7	3.22581	0.00835934	WNT2, SMAD9, WNT5B, TBX3, IL6ST, IGF1, KLF4	88	140	6879	3.90852	0.683377	0.437307	9.39584
MSX2		KEGG_PATHWAY	hsa05410:Hypertrophic cardiomyopathy (HCM)	5	2.30415	0.016746	ITGA9, ACTC1, SGCG, IGF1, CACNA2D2	88	78	6879	5.01093	0.901098	0.537546	18.0041
PCP4L1		KEGG_PATHWAY	hsa00480:Glutathione metabolism	4	1.84332	0.0263108	GPX2, GSTA2, GSTA3, GSTM3	88	51	6879	6.13102	0.974083	0.598767	26.9045
TRPC5		KEGG_PATHWAY	hsa03320:PPAR signaling pathway	4	1.84332	0.0524703	LPL, SCD5, ACADL, ANGPTL4	88	67	6879	4.66689	0.999379	0.771628	46.9276
IL6ST		KEGG_PATHWAY	hsa04925:Aldosterone synthesis and secretion	4	1.84332	0.0825707	PRKD1, ADCY1, CACNA1G, NR4A1	88	81	6879	3.86027	0.999993	0.860232	63.6861
WNT5B		KEGG_PATHWAY	hsa04350:TGF-beta signaling pathway	4	1.84332	0.0898129	NBL1, SMAD9, SMAD6, BAMBI	88	84	6879	3.7224	0.999997	0.841464	66.9162
NANOS3		KEGG_PATHWAY	hsa04310:Wnt signaling pathway	5	2.30415	0.0968535	WNT2, WNT5B, SFRP2, SOX17, BAMBI	88	138	6879	2.83226	0.999999	0.825273	69.8023
SOSTDC1
ST8SIA6		Category	Term	Count	%	PValue	Genes	List Total	Pop Hits	Pop Total	Fold Enrichment	Bonferroni	Benjamini	FDR
DLX2		GOTERM_BP_DIRECT	GO:0000122~negative regulation of transcription from RNA polymerase II promoter	22	10.1382	7.37511e-05	TBX3, EFNA1, TFCP2L1, ARID5B, EDN1, ZHX2, FOSB, MSX2, DLX2, GATA2, DLX1, MSX1, GATA3, SOX15, HIVEP1, BHLHE40, SOX17, TFAP2C, HDAC9, CRYM, KLF4, RUNX3	192	720	16792	2.67234	0.0996983	0.0996983	0.1217
DOCK2		GOTERM_BP_DIRECT	GO:0045444~fat cell differentiation	7	3.22581	0.000181056	WNT5B, EGR2, SMAD6, ARID5B, NR4A1, GRK5, KLF4	192	73	16792	8.38642	0.227287	0.120959	0.29852
WNT2		GOTERM_BP_DIRECT	GO:0045746~negative regulation of Notch signaling pathway	5	2.30415	0.000308345	DLX2, GATA2, DLX1, OVOL2, GDPD5	192	29	16792	15.079	0.355417	0.136174	0.507889
KLF4		GOTERM_BP_DIRECT	GO:0045944~positive regulation of transcription from RNA polymerase II promoter	25	11.5207	0.000327013	EVX1, EDN1, MYBL2, WNT2, GATA2, BARX1, OVOL2, GATA3, GATA4, SOX15, SOX17, SERTAD1, EGR2, NR4A1, IGF1, GRHL3, GPER1, FOSB, SIX6, PRKD1, DLX2, MSX1, SFRP2, TFAP2C, KLF4	192	981	16792	2.22881	0.372331	0.109913	0.538559
CXCR4		GOTERM_BP_DIRECT	GO:0045669~positive regulation of osteoblast differentiation	6	2.76498	0.000594414	PRKD1, MSX2, SFRP2, IL6ST, IGF1, IL6R	192	60	16792	8.74583	0.571171	0.155778	0.976917
SGCG		GOTERM_BP_DIRECT	GO:0030182~neuron differentiation	7	3.22581	0.000752165	WNT2, WNT5B, TRPC6, TRPC5, HOXD1, HDAC9, ITM2C	192	95	16792	6.4443	0.657501	0.163544	1.23467
GATA2		GOTERM_BP_DIRECT	GO:0006366~transcription from RNA polymerase II promoter	16	7.37327	0.000795385	EGR2, GRHL3, FOSB, MYBL2, SIX6, GATA2, DLX2, BARX1, MSX1, OVOL2, GATA3, GATA4, HIVEP1, TFAP2C, KLF4, RUNX3	192	513	16792	2.72775	0.67796	0.149447	1.30518
FRMD6		GOTERM_BP_DIRECT	GO:0045786~negative regulation of cell cycle	5	2.30415	0.000798722	GATA3, RHOB, NR4A1, HPGD, RUNX3	192	37	16792	11.8187	0.679488	0.132578	1.31062
GSTA2		GOTERM_BP_DIRECT	GO:0001525~angiogenesis	10	4.60829	0.00104523	PRKD1, SHB, OVOL2, ANG, EFNA1, RHOB, SOX17, EPHB1, VASH1, ANGPTL4	192	223	16792	3.9219	0.774442	0.1525	1.71184
ACADL		GOTERM_BP_DIRECT	GO:0051091~positive regulation of sequence-specific DNA binding transcription factor activity	7	3.22581	0.00126856	WNT2, TNFRSF11A, ARID5B, EDN1, PYCARD, ANXA3, MID2	192	105	16792	5.83056	0.835949	0.165362	2.07402
PDK4		GOTERM_BP_DIRECT	GO:0071356~cellular response to tumor necrosis factor	7	3.22581	0.00161136	CRHBP, GATA3, EDN1, CCL3L3, PYCARD, POSTN, GPER1	192	110	16792	5.56553	0.899382	0.188415	2.6275
PRSS12		GOTERM_BP_DIRECT	GO:0010595~positive regulation of endothelial cell migration	5	2.30415	0.0018226	PRKD1, GATA3, EDN1, RHOB, ANXA3	192	46	16792	9.50634	0.925559	0.194651	2.96711
ELOVL3		GOTERM_BP_DIRECT	GO:0045766~positive regulation of angiogenesis	7	3.22581	0.00202044	PRKD1, GATA2, SFRP2, GATA4, RHOB, ANXA3, ANGPTL4	192	115	16792	5.32355	0.943866	0.198716	3.28416
CCL3L3		GOTERM_BP_DIRECT	GO:0071277~cellular response to calcium ion	5	2.30415	0.00267076	ADCY1, CRHBP, EDN1, ITPKB, FOSB	192	51	16792	8.57435	0.977813	0.238159	4.31949
EPHB1		GOTERM_BP_DIRECT	GO:0048013~ephrin receptor signaling pathway	6	2.76498	0.00298957	NGEF, EFNA1, PSEN2, EPHB1, SDC2, KALRN	192	86	16792	6.10174	0.985927	0.24741	4.82323
RUNX3		GOTERM_BP_DIRECT	GO:0007565~female pregnancy	6	2.76498	0.00346722	CD38, CRHBP, TFCP2L1, FOSB, HPGD, TAC3	192	89	16792	5.89607	0.992887	0.265906	5.57329
SIX6		GOTERM_BP_DIRECT	GO:0042475~odontogenesis of dentin-containing tooth	5	2.30415	0.00351888	DLX2, DLX1, MSX1, SOSTDC1, LRP4	192	55	16792	7.95076	0.993394	0.255675	5.65409
RTN4RL1		GOTERM_BP_DIRECT	GO:0007204~positive regulation of cytosolic calcium ion concentration	7	3.22581	0.00431958	CD38, GATA2, TRPC6, CXCR4, TRPC5, EDN1, GPER1	192	134	16792	4.56872	0.997897	0.289984	6.898
KYNU		GOTERM_BP_DIRECT	GO:0008584~male gonad development	6	2.76498	0.00438157	SFRP2, GATA3, ARID5B, GATA4, SOX15, TFAP2C	192	94	16792	5.58245	0.998075	0.280435	6.99365
PYDC1		GOTERM_BP_DIRECT	GO:0043066~negative regulation of apoptotic process	13	5.99078	0.00597394	MSX2, CD38, EGR3, ACTC1, MSX1, TBX3, PRLR, IL6ST, SMAD6, PSEN2, IGF1, GRK5, ANGPTL4	192	455	16792	2.49881	0.999803	0.347289	9.41945
SCD5		GOTERM_BP_DIRECT	GO:0008284~positive regulation of cell proliferation	13	5.99078	0.00717153	WNT2, TNFRSF11A, TBX3, SFRP2, TRPC5, IL6ST, EDN1, IGF1, IL6R, GPER1, GRK5, BAMBI, SERTAD1	192	466	16792	2.43982	0.999965	0.386178	11.2045
DMRTA2		GOTERM_BP_DIRECT	GO:0006865~amino acid transport	4	1.84332	0.0072558	SLC7A3, PDPN, SLC7A8, SLC43A1	192	35	16792	9.99524	0.999969	0.375847	11.3289
KANK4		GOTERM_BP_DIRECT	GO:0001938~positive regulation of endothelial cell proliferation	5	2.30415	0.00788893	WNT2, PRKD1, EGR3, ANG, NR4A1	192	69	16792	6.33756	0.999987	0.387597	12.258
DLX1		GOTERM_BP_DIRECT	GO:0007267~cell-cell signaling	9	4.14747	0.00866186	WNT2, BARX1, TNFRSF11A, SFRP2, EFNA1, EDN1, FGF16, GATA4, TFAP2C	192	254	16792	3.09892	0.999996	0.403201	13.3798
KANK3		GOTERM_BP_DIRECT	GO:0045599~negative regulation of fat cell differentiation	4	1.84332	0.0120105	MSX2, GATA2, GATA3, GPER1	192	42	16792	8.32937	1	0.497552	18.0864
SMAGP		GOTERM_BP_DIRECT	GO:2000679~positive regulation of transcription regulatory region DNA binding	3	1.38249	0.0122603	GATA3, IGF1, KLF4	192	15	16792	17.4917	1	0.491168	18.4276
PLBD1		GOTERM_BP_DIRECT	GO:0008152~metabolic process	7	3.22581	0.0125354	GSTA2, GSTA3, GSTM3, ACO1, FGF16, ARSJ, MAN1C1	192	168	16792	3.6441	1	0.485884	18.802
SGK1		GOTERM_BP_DIRECT	GO:0010613~positive regulation of cardiac muscle hypertrophy	3	1.38249	0.0139079	IL6ST, EDN1, IGF1	192	16	16792	16.3984	1	0.509475	20.6453
IRX6		GOTERM_BP_DIRECT	GO:0030514~negative regulation of BMP signaling pathway	4	1.84332	0.0144828	NBL1, SFRP2, SMAD6, SOSTDC1	192	45	16792	7.77407	1	0.511471	21.4058
ANG		GOTERM_BP_DIRECT	GO:0045165~cell fate commitment	4	1.84332	0.0153661	WNT2, WNT5B, GATA3, GATA4	192	46	16792	7.60507	1	0.520514	22.5608
GPX2		GOTERM_BP_DIRECT	GO:0023019~signal transduction involved in regulation of gene expression	3	1.38249	0.0193819	MSX2, MSX1, SOX17	192	19	16792	13.8092	1	0.593046	27.6137
GREM2		GOTERM_BP_DIRECT	GO:0060716~labyrinthine layer blood vessel development	3	1.38249	0.0193819	WNT2, OVOL2, VASH1	192	19	16792	13.8092	1	0.593046	27.6137
SLC43A1		GOTERM_BP_DIRECT	GO:0016055~Wnt signaling pathway	7	3.22581	0.0202075	WNT2, WNT5B, SFRP2, SOSTDC1, GRK5, AMOTL2, LRP4	192	187	16792	3.27384	1	0.596848	28.6134
LPL		GOTERM_BP_DIRECT	GO:0007179~transforming growth factor beta receptor signaling pathway	5	2.30415	0.0208703	SMAD9, SMAD6, BAMBI, FURIN, HPGD	192	92	16792	4.75317	1	0.597522	29.4065
CACNA1G		GOTERM_BP_DIRECT	GO:0009887~organ morphogenesis	5	2.30415	0.0208703	GATA2, TBX3, GATA3, FGF16, SIX6	192	92	16792	4.75317	1	0.597522	29.4065
TFCP2L1		GOTERM_BP_DIRECT	GO:0090427~activation of meiosis	2	0.921659	0.0226202	MSX2, MSX1	192	2	16792	87.4583	1	0.616443	31.4611
RNASE4		GOTERM_BP_DIRECT	GO:0071389~cellular response to mineralocorticoid stimulus	2	0.921659	0.0226202	EDN1, GPER1	192	2	16792	87.4583	1	0.616443	31.4611
MAN1C1		GOTERM_BP_DIRECT	GO:0021893~cerebral cortex GABAergic interneuron fate commitment	2	0.921659	0.0226202	DLX2, DLX1	192	2	16792	87.4583	1	0.616443	31.4611
BARX1		GOTERM_BP_DIRECT	GO:2001055~positive regulation of mesenchymal cell apoptotic process	2	0.921659	0.0226202	MSX2, MSX1	192	2	16792	87.4583	1	0.616443	31.4611
HPGD		GOTERM_BP_DIRECT	GO:1901687~glutathione derivative biosynthetic process	3	1.38249	0.025607	GSTA2, GSTA3, GSTM3	192	22	16792	11.9261	1	0.651951	34.8385
SYTL5		GOTERM_BP_DIRECT	GO:0010719~negative regulation of epithelial to mesenchymal transition	3	1.38249	0.025607	OVOL2, SFRP2, EFNA1	192	22	16792	11.9261	1	0.651951	34.8385
KIAA1456		GOTERM_BP_DIRECT	GO:0035924~cellular response to vascular endothelial growth factor stimulus	3	1.38249	0.0278392	PRKD1, EGR3, NR4A1	192	23	16792	11.4076	1	0.672679	37.2598
LCP1		GOTERM_BP_DIRECT	GO:0009612~response to mechanical stimulus	4	1.84332	0.0295773	GATA4, POSTN, FOSB, KALRN	192	59	16792	5.92938	1	0.6851	39.0864
COLEC12		GOTERM_BP_DIRECT	GO:0009954~proximal/distal pattern formation	3	1.38249	0.0301465	DLX2, DLX1, LRP4	192	24	16792	10.9323	1	0.682437	39.6736
C10orf10		GOTERM_BP_DIRECT	GO:0001947~heart looping	4	1.84332	0.0322137	OVOL2, TBX3, GATA4, SOX17	192	61	16792	5.73497	1	0.69747	41.7619
EFHD1		GOTERM_BP_DIRECT	GO:0000902~cell morphogenesis	4	1.84332	0.0335764	MSX1, PDPN, TFCP2L1, SIDT2	192	62	16792	5.64247	1	0.703542	43.1012
TAC3		GOTERM_BP_DIRECT	GO:0035880~embryonic nail plate morphogenesis	2	0.921659	0.0337387	MSX2, MSX1	192	3	16792	58.3056	1	0.696395	43.2588
MS4A6A		GOTERM_BP_DIRECT	GO:0021544~subpallium development	2	0.921659	0.0337387	DLX2, DLX1	192	3	16792	58.3056	1	0.696395	43.2588
GPER1		GOTERM_BP_DIRECT	GO:0038098~sequestering of BMP from receptor via BMP binding	2	0.921659	0.0337387	NBL1, GREM2	192	3	16792	58.3056	1	0.696395	43.2588
ANGPTL4		GOTERM_BP_DIRECT	GO:2000035~regulation of stem cell division	2	0.921659	0.0337387	SFRP2, SOX17	192	3	16792	58.3056	1	0.696395	43.2588
CLEC4D		GOTERM_BP_DIRECT	GO:0021882~regulation of transcription from RNA polymerase II promoter involved in forebrain neuron fate commitment	2	0.921659	0.0337387	DLX2, DLX1	192	3	16792	58.3056	1	0.696395	43.2588
MBP		GOTERM_BP_DIRECT	GO:0002277~myeloid dendritic cell activation involved in immune response	2	0.921659	0.0337387	DOCK2, PYCARD	192	3	16792	58.3056	1	0.696395	43.2588
SOX17		GOTERM_BP_DIRECT	GO:2001238~positive regulation of extrinsic apoptotic signaling pathway	3	1.38249	0.0349787	PYCARD, GPER1, ITM2C	192	26	16792	10.0913	1	0.700961	44.4491
EFNA1		GOTERM_BP_DIRECT	GO:0014065~phosphatidylinositol 3-kinase signaling	3	1.38249	0.0374997	GATA3, EDN1, IGF1	192	27	16792	9.71759	1	0.717968	46.7973
MT2A		GOTERM_BP_DIRECT	GO:0008285~negative regulation of cell proliferation	10	4.60829	0.0375973	MSX2, MSX1, ADAMTS8, SFRP2, SMAD6, GATA3, CCL3L3, PTPRU, GPER1, KLF4	192	396	16792	2.20854	1	0.710688	46.8863
PPAPDC1A		GOTERM_BP_DIRECT	GO:0003281~ventricular septum development	3	1.38249	0.0400883	SMAD6, GATA3, GATA4	192	28	16792	9.37054	1	0.72602	49.111
NTS		GOTERM_BP_DIRECT	GO:0035116~embryonic hindlimb morphogenesis	3	1.38249	0.0400883	MSX2, MSX1, TBX3	192	28	16792	9.37054	1	0.72602	49.111
GSTA3		GOTERM_BP_DIRECT	GO:0050766~positive regulation of phagocytosis	3	1.38249	0.0427424	GATA2, DOCK2, PYCARD	192	29	16792	9.04741	1	0.741346	51.385
BAHCC1		GOTERM_BP_DIRECT	GO:0060214~endocardium formation	2	0.921659	0.0447314	OVOL2, SOX17	192	4	16792	43.7292	1	0.750055	53.0263
CD38		GOTERM_BP_DIRECT	GO:0042662~negative regulation of mesodermal cell fate specification	2	0.921659	0.0447314	SFRP2, SOX17	192	4	16792	43.7292	1	0.750055	53.0263
PSTPIP2		GOTERM_BP_DIRECT	GO:0060325~face morphogenesis	3	1.38249	0.0454603	MSX1, CRISPLD2, ARID5B	192	30	16792	8.74583	1	0.74849	53.6145
NGEF		GOTERM_BP_DIRECT	GO:0044344~cellular response to fibroblast growth factor stimulus	3	1.38249	0.0454603	EGR3, NR4A1, POSTN	192	30	16792	8.74583	1	0.74849	53.6145
C1orf115		GOTERM_BP_DIRECT	GO:0016477~cell migration	6	2.76498	0.0468845	ANG, EFNA1, BAMBI, LCP1, SDC2, PSTPIP2	192	172	16792	3.05087	1	0.75229	54.7441
TRIML2		GOTERM_BP_DIRECT	GO:0001666~response to hypoxia	6	2.76498	0.0468845	CD38, CXCR4, ANG, PSEN2, POSTN, ANGPTL4	192	172	16792	3.05087	1	0.75229	54.7441
IGF1		GOTERM_BP_DIRECT	GO:0071392~cellular response to estradiol stimulus	3	1.38249	0.0482402	MSX2, CRHBP, GPER1	192	31	16792	8.46371	1	0.755398	55.7953
KCNK13		GOTERM_BP_DIRECT	GO:0030513~positive regulation of BMP signaling pathway	3	1.38249	0.0482402	MSX2, MSX1, GATA4	192	31	16792	8.46371	1	0.755398	55.7953
SOX15		GOTERM_BP_DIRECT	GO:0016485~protein processing	4	1.84332	0.048811	PSEN2, CPXM2, ADAMTS2, FURIN	192	72	16792	4.8588	1	0.752728	56.231
SLC7A3		GOTERM_BP_DIRECT	GO:0003091~renal water homeostasis	3	1.38249	0.0510804	PRKAR2B, ADCY1, AQP3	192	32	16792	8.19922	1	0.762077	57.9236
HOXD1		GOTERM_BP_DIRECT	GO:0009953~dorsal/ventral pattern formation	3	1.38249	0.0510804	OVOL2, EDN1, LRP4	192	32	16792	8.19922	1	0.762077	57.9236
YPEL2		GOTERM_BP_DIRECT	GO:0051480~regulation of cytosolic calcium ion concentration	3	1.38249	0.0510804	TRPC6, TRPC5, GPER1	192	32	16792	8.19922	1	0.762077	57.9236
SMAD9		GOTERM_BP_DIRECT	GO:0035115~embryonic forelimb morphogenesis	3	1.38249	0.0510804	MSX2, MSX1, TBX3	192	32	16792	8.19922	1	0.762077	57.9236
PDE10A		GOTERM_BP_DIRECT	GO:0051726~regulation of cell cycle	5	2.30415	0.0531999	NANOS3, OVOL2, GRK5, MYBL2, CABLES1	192	124	16792	3.52655	1	0.769798	59.4488
EVX1		GOTERM_BP_DIRECT	GO:0070120~ciliary neurotrophic factor-mediated signaling pathway	2	0.921659	0.0555996	IL6ST, IL6R	192	5	16792	34.9833	1	0.778763	61.1128
MSX1		GOTERM_BP_DIRECT	GO:0034392~negative regulation of smooth muscle cell apoptotic process	2	0.921659	0.0555996	EDN1, IGF1	192	5	16792	34.9833	1	0.778763	61.1128
GPRC5C		GOTERM_BP_DIRECT	GO:2001300~lipoxin metabolic process	2	0.921659	0.0555996	ALOX5, HPGD	192	5	16792	34.9833	1	0.778763	61.1128
PYCARD		GOTERM_BP_DIRECT	GO:0002821~positive regulation of adaptive immune response	2	0.921659	0.0555996	IL6ST, PYCARD	192	5	16792	34.9833	1	0.778763	61.1128
COL9A2		GOTERM_BP_DIRECT	GO:0090131~mesenchyme migration	2	0.921659	0.0555996	ACTG2, ACTC1	192	5	16792	34.9833	1	0.778763	61.1128
ARID5B		GOTERM_BP_DIRECT	GO:0030324~lung development	4	1.84332	0.0557012	WNT2, PDPN, CRISPLD2, ADAMTS2	192	76	16792	4.60307	1	0.773243	61.1818
AHNAK		GOTERM_BP_DIRECT	GO:0030509~BMP signaling pathway	4	1.84332	0.0557012	SMAD9, SMAD6, GREM2, LRP4	192	76	16792	4.60307	1	0.773243	61.1818
MANEA		GOTERM_BP_DIRECT	GO:0043065~positive regulation of apoptotic process	8	3.68664	0.0560096	NGEF, SFRP2, PSEN2, PYCARD, RHOB, NR4A1, GPER1, KALRN	192	300	16792	2.33222	1	0.76908	61.3906
ARHGAP18		GOTERM_BP_DIRECT	GO:0042493~response to drug	8	3.68664	0.0583082	CD38, LPL, ADCY1, ACTC1, SFRP2, GATA3, GATA4, FOSB	192	304	16792	2.30154	1	0.777065	62.9138
PRKAR2B		GOTERM_BP_DIRECT	GO:0045666~positive regulation of neuron differentiation	4	1.84332	0.0593108	NBL1, GATA2, TRPC6, GDPD5	192	78	16792	4.48504	1	0.777127	63.5604
LDLRAP1		GOTERM_BP_DIRECT	GO:0045892~negative regulation of transcription, DNA-templated	11	5.06912	0.0594483	MSX2, CD38, OVOL2, TBX3, SFRP2, GATA3, ARID5B, ZHX2, BHLHE40, HDAC9, KLF4	192	499	16792	1.92794	1	0.772189	63.6483
CRYM		GOTERM_BP_DIRECT	GO:0003180~aortic valve morphogenesis	2	0.921659	0.0663449	EFNA1, GATA3	192	6	16792	29.1528	1	0.803923	67.8076
PRPH		GOTERM_BP_DIRECT	GO:0061002~negative regulation of dendritic spine morphogenesis	2	0.921659	0.0663449	NGEF, EFNA1	192	6	16792	29.1528	1	0.803923	67.8076
ADAMTS8		GOTERM_BP_DIRECT	GO:0061312~BMP signaling pathway involved in heart development	2	0.921659	0.0663449	MSX2, MSX1	192	6	16792	29.1528	1	0.803923	67.8076
ZHX2		GOTERM_BP_DIRECT	GO:0048263~determination of dorsal identity	2	0.921659	0.0663449	NBL1, GREM2	192	6	16792	29.1528	1	0.803923	67.8076
ITGA9		GOTERM_BP_DIRECT	GO:0050731~positive regulation of peptidyl-tyrosine phosphorylation	4	1.84332	0.0668506	EFNA1, IGF1, IL6R, LRP4	192	82	16792	4.26626	1	0.801147	68.0943
BHLHE40		GOTERM_BP_DIRECT	GO:0051056~regulation of small GTPase mediated signal transduction	5	2.30415	0.0668656	DEPDC7, NGEF, RHOB, ARHGAP18, KALRN	192	134	16792	3.26337	1	0.795974	68.1028
AQP3		GOTERM_BP_DIRECT	GO:0006954~inflammatory response	9	4.14747	0.0674992	PRKD1, TNFRSF11A, CXCR4, CRHBP, CCL3L3, CHST2, PYCARD, GPER1, HDAC9	192	379	16792	2.07685	1	0.793948	68.4585
EGR3		GOTERM_BP_DIRECT	GO:0060070~canonical Wnt signaling pathway	4	1.84332	0.068801	WNT2, SOX17, PTPRU, KLF4	192	83	16792	4.21486	1	0.795263	69.1777
FGF16		GOTERM_BP_DIRECT	GO:0001501~skeletal system development	5	2.30415	0.0712888	HAPLN1, COL9A2, TBX3, IGF1, POSTN	192	137	16792	3.19191	1	0.802148	70.5095
TBX3		GOTERM_BP_DIRECT	GO:0030198~extracellular matrix organization	6	2.76498	0.073449	ITGA9, HAPLN1, COL9A2, CRISPLD2, POSTN, FURIN	192	196	16792	2.6773	1	0.807167	71.6219
CCDC74B		GOTERM_BP_DIRECT	GO:0061051~positive regulation of cell growth involved in cardiac muscle cell development	2	0.921659	0.0769685	EDN1, IGF1	192	7	16792	24.9881	1	0.817727	73.3501
GRHL3		GOTERM_BP_DIRECT	GO:0009913~epidermal cell differentiation	2	0.921659	0.0769685	OVOL2, KLF4	192	7	16792	24.9881	1	0.817727	73.3501
CCDC92		GOTERM_BP_DIRECT	GO:0003183~mitral valve morphogenesis	2	0.921659	0.0769685	EFNA1, SMAD6	192	7	16792	24.9881	1	0.817727	73.3501
SLC16A4		GOTERM_BP_DIRECT	GO:0007517~muscle organ development	4	1.84332	0.0810332	EGR3, MSX1, SGCG, IGF1	192	89	16792	3.93071	1	0.829606	75.223
KLRB1		GOTERM_BP_DIRECT	GO:0002548~monocyte chemotaxis	3	1.38249	0.082435	TNFRSF11A, CCL3L3, IL6R	192	42	16792	6.24702	1	0.830601	75.8397
FNDC5		GOTERM_BP_DIRECT	GO:0010837~regulation of keratinocyte proliferation	2	0.921659	0.0874719	PRKD1, OVOL2	192	8	16792	21.8646	1	0.844656	77.9387
VASH1		GOTERM_BP_DIRECT	GO:0007217~tachykinin receptor signaling pathway	2	0.921659	0.0874719	GRK5, TAC3	192	8	16792	21.8646	1	0.844656	77.9387
CPXM2		GOTERM_BP_DIRECT	GO:0045617~negative regulation of keratinocyte differentiation	2	0.921659	0.0874719	MSX2, OVOL2	192	8	16792	21.8646	1	0.844656	77.9387
SMAD6		GOTERM_BP_DIRECT	GO:0044351~macropinocytosis	2	0.921659	0.0874719	DOCK2, PYCARD	192	8	16792	21.8646	1	0.844656	77.9387
STON2		GOTERM_BP_DIRECT	GO:0048513~animal organ development	2	0.921659	0.0874719	BARX1, LRP4	192	8	16792	21.8646	1	0.844656	77.9387
DDIT4L		GOTERM_BP_DIRECT	GO:0061180~mammary gland epithelium development	2	0.921659	0.0874719	WNT2, MSX1	192	8	16792	21.8646	1	0.844656	77.9387
ENC1		GOTERM_BP_DIRECT	GO:0045059~positive thymic T cell selection	2	0.921659	0.0874719	DOCK2, ITPKB	192	8	16792	21.8646	1	0.844656	77.9387
CACNA2D2		GOTERM_BP_DIRECT	GO:0035556~intracellular signal transduction	9	4.14747	0.0901495	PRKD1, PRKAR2B, DEPDC7, SGK1, ADCY1, TUFT1, PSEN2, EDN1, KALRN	192	403	16792	1.95316	1	0.849655	78.9835
SIDT2		GOTERM_BP_DIRECT	GO:0003151~outflow tract morphogenesis	3	1.38249	0.0962656	TBX3, SFRP2, SOX17	192	46	16792	5.7038	1	0.864922	81.1983
ITM2C		GOTERM_BP_DIRECT	GO:0035767~endothelial cell chemotaxis	2	0.921659	0.0978563	EGR3, NR4A1	192	9	16792	19.4352	1	0.865856	81.7374
FAAH		GOTERM_BP_DIRECT	GO:0050774~negative regulation of dendrite morphogenesis	2	0.921659	0.0978563	TRPC6, TRPC5	192	9	16792	19.4352	1	0.865856	81.7374
MUM1L1		GOTERM_BP_DIRECT	GO:0048617~embryonic foregut morphogenesis	2	0.921659	0.0978563	GATA4, SOX17	192	9	16792	19.4352	1	0.865856	81.7374
METTL7A		GOTERM_BP_DIRECT	GO:0090197~positive regulation of chemokine secretion	2	0.921659	0.0978563	LPL, PYCARD	192	9	16792	19.4352	1	0.865856	81.7374
ACTG2		GOTERM_BP_DIRECT	GO:0070102~interleukin-6-mediated signaling pathway	2	0.921659	0.0978563	IL6ST, IL6R	192	9	16792	19.4352	1	0.865856	81.7374
LOC100652768		GOTERM_BP_DIRECT	GO:0031100~organ regeneration	3	1.38249	0.0998205	PTPRU, LCP1, ANXA3	192	47	16792	5.58245	1	0.867827	82.3829
ARSJ
EDN1
EPHX4
ALOX5
IL6R
PTPRU
TUFT1
GSTM3
TMEM150C
HDAC9
ITLN2
BAMBI
ASRGL1
PCSK1N
DEPDC7
APLNR
SHB
CRISPLD2
TMEM139
FAM155B
CHST2
KLHDC8A
LRP4
RAB31
GDPD5
ARL4D
PXDNL
TNFRSF11A
PSEN2
PHKA1
GATA4
EGR2
HIVEP1
PEG10
IER5
TFAP2C
CABLES1
SCPEP1
FOSB
SDC2
RAB20
ADCY1
SNX10
NBL1
SYNDIG1
ACO1
PRKD1
GRK5
MYBL2
PRLR
SERTAD1
ATP8A1
TMEM154
GRM2
SLC7A8
KLRG2
PDE8A
RRP9
PDZRN3
SLCO2A1
ITPKB
SFRP2
TMPRSS11E
PRTG
MID2
FAM102B
RBM24
ADAMTS2
PDPN
SLFN5
PPM1H
TRPC6
NR4A1
LAD1
VSTM2B
FURIN
BEND4
MRVI1
RHOB
TMCC3
AGL
AMOTL2
ANXA3
SPRY4
OVOL2
ACTC1
ST6GAL1
MPV17L
DUSP2
KALRN
MFSD7
LYST
HABP4

## Sheet: 6. SAd2 D>BD
SOX2
TTYH1		Category	Term	Count	%	PValue	Genes	List Total	Pop Hits	Pop Total	Fold Enrichment	Bonferroni	Benjamini	FDR
VAT1L		KEGG_PATHWAY	hsa05200:Pathways in cancer	16	0.0533191	2.32884e-05	WNT5A, BMP4, FZD8, ADCY2, PTGER3, KITLG, CDK6, CXCL12, TCF7L1, FZD7, PDGFRA, HHIP, GNG4, FGF2, TRAF5, FN1	78	393	6879	3.59053	0.00344079	0.00344079	0.0277421
NRXN3		KEGG_PATHWAY	hsa05217:Basal cell carcinoma	6	0.0199947	0.000317693	WNT5A, BMP4, FZD8, HHIP, FZD7, TCF7L1	78	54	6879	9.79915	0.0459374	0.0232387	0.377842
ZIC2		KEGG_PATHWAY	hsa04916:Melanogenesis	7	0.0233271	0.000836527	WNT5A, FZD8, ADCY2, KITLG, FZD7, TCF7L1, CALM1	78	100	6879	6.17346	0.116494	0.0404453	0.992094
USP44		KEGG_PATHWAY	hsa04550:Signaling pathways regulating pluripotency of stem cells	8	0.0266596	0.000912527	WNT5A, BMP4, FZD8, NODAL, SOX2, FGF2, FZD7, ZIC3	78	140	6879	5.03956	0.126385	0.0332148	1.08178
CYP26A1		KEGG_PATHWAY	hsa04015:Rap1 signaling pathway	9	0.029992	0.00227503	ADCY2, FLT1, MAGI2, PDGFRA, KITLG, EFNA5, FGF2, KDR, CALM1	78	210	6879	3.77967	0.286154	0.0651954	2.67706
ZIC3		KEGG_PATHWAY	hsa04151:PI3K-Akt signaling pathway	11	0.0366569	0.0048258	FLT1, PDGFRA, KITLG, EFNA5, CDK6, GNG4, THBS2, FGF2, KDR, FN1, THBS4	78	345	6879	2.81193	0.511271	0.11248	5.6004
KITLG		KEGG_PATHWAY	hsa04390:Hippo signaling pathway	7	0.0233271	0.00666894	WNT5A, BMP4, FZD8, SOX2, BMP7, FZD7, TCF7L1	78	151	6879	4.08839	0.628538	0.131921	7.66245
FGFBP3		KEGG_PATHWAY	hsa04014:Ras signaling pathway	8	0.0266596	0.0128733	FLT1, PDGFRA, KITLG, EFNA5, GNG4, FGF2, KDR, CALM1	78	226	6879	3.12185	0.853043	0.213137	14.3042
TOX		KEGG_PATHWAY	hsa04350:TGF-beta signaling pathway	5	0.0166622	0.0142551	BMP4, NODAL, FST, BMP7, LEFTY1	78	84	6879	5.24954	0.88056	0.210302	15.7226
LDB2		KEGG_PATHWAY	hsa04310:Wnt signaling pathway	6	0.0199947	0.0188412	WNT5A, FZD8, SFRP1, PRICKLE1, FZD7, TCF7L1	78	138	6879	3.83445	0.940101	0.245356	20.2771
BCAT1		KEGG_PATHWAY	hsa04360:Axon guidance	5	0.0166622	0.0534637	EPHA4, NRP1, SEMA3C, EFNA5, CXCL12	78	127	6879	3.47214	0.999706	0.522539	48.0361
B3GALT1		KEGG_PATHWAY	hsa05205:Proteoglycans in cancer	6	0.0199947	0.0727322	WNT5A, FZD8, FGF2, FZD7, KDR, FN1	78	200	6879	2.64577	0.999986	0.605969	59.329
ESRG		KEGG_PATHWAY	hsa04510:Focal adhesion	6	0.0199947	0.0802748	FLT1, PDGFRA, THBS2, KDR, FN1, THBS4	78	206	6879	2.56871	0.999996	0.61429	63.1001
GFPT2
FBP1		Category	Term	Count	%	PValue	Genes	List Total	Pop Hits	Pop Total	Fold Enrichment	Bonferroni	Benjamini	FDR
TMEM132B		GOTERM_BP_DIRECT	GO:0035019~somatic stem cell population maintenance	8	0.0266596	5.34045e-06	PRDM14, SFRP1, TDGF1, SOX2, LDB2, SOX9, FGF2, ZIC3	178	65	16792	11.6107	0.007984	0.007984	0.0088737
FHL1		GOTERM_BP_DIRECT	GO:0007411~axon guidance	11	0.0366569	7.23527e-06	WNT5A, FLRT3, FLRT2, NRP1, NRXN3, OTX2, SEMA3C, EFNA5, BMP7, CXCL12, FEZ1	178	159	16792	6.52646	0.0108014	0.00541537	0.0120219
PTPRZ1		GOTERM_BP_DIRECT	GO:0001938~positive regulation of endothelial cell proliferation	8	0.0266596	7.98833e-06	WNT5A, BMP4, NRP1, CXCL12, VASH2, FGF2, KDR, THBS4	178	69	16792	10.9376	0.0119189	0.00398887	0.0132731
STMN2		GOTERM_BP_DIRECT	GO:0001501~skeletal system development	10	0.0333244	1.47737e-05	CDKN1C, GDF3, MATN3, LECT1, SOX11, DLL3, VCAN, SOX9, BMP7, CDH11	178	137	16792	6.88592	0.0219313	0.00552852	0.0245461
GDPD2		GOTERM_BP_DIRECT	GO:0050680~negative regulation of epithelial cell proliferation	7	0.0233271	2.64292e-05	CDKN1C, WNT5A, BMP4, SFRP1, SOX2, CDK6, SOX9	178	56	16792	11.7921	0.0388942	0.00790277	0.0439076
RHBDL3		GOTERM_BP_DIRECT	GO:0007155~cell adhesion	17	0.0566516	2.92519e-05	IGFBP7, LRRN2, KITLG, EDIL3, CXCL12, RND3, EPHA4, RGMB, FAT1, NLGN4X, VCAN, HAS3, THBS2, FN1, THBS4, CDH11, FEZ1	178	459	16792	3.49397	0.0429578	0.00729126	0.048596
IGDCC4		GOTERM_BP_DIRECT	GO:0045669~positive regulation of osteoblast differentiation	7	0.0233271	3.93571e-05	BMP4, SOX11, GJA1, JAG1, BMP7, FGF2, GDPD2	178	60	16792	11.006	0.057365	0.00840394	0.0653784
NELL2		GOTERM_BP_DIRECT	GO:0010595~positive regulation of endothelial cell migration	6	0.0199947	0.000118783	WNT5A, BMP4, NRP1, TDGF1, FGF2, KDR	178	46	16792	12.3048	0.163312	0.0220415	0.197196
KLKB1		GOTERM_BP_DIRECT	GO:0045893~positive regulation of transcription, DNA-templated	16	0.0533191	0.000372664	WNT5A, BMP4, SOX11, OTX2, SOX2, SOX9, TOX3, ZIC3, FZD7, ZIC2, CDKN1C, RGMB, SFRP1, HAS3, BMP7, FGF2	178	515	16792	2.93086	0.428489	0.0602709	0.617445
CDKN1C		GOTERM_BP_DIRECT	GO:0002042~cell migration involved in sprouting angiogenesis	4	0.0133298	0.00047725	NRP1, TDGF1, FGF2, KDR	178	15	16792	25.1566	0.511552	0.0691455	0.790084
PCDH8		GOTERM_BP_DIRECT	GO:0051965~positive regulation of synapse assembly	6	0.0199947	0.000489535	FLRT3, FLRT2, NRXN3, EFNA5, THBS2, SLITRK5	178	62	16792	9.12939	0.520481	0.0646323	0.810343
MEIS2		GOTERM_BP_DIRECT	GO:0060395~SMAD protein signal transduction	6	0.0199947	0.000489535	BMP4, GDF3, MAGI2, NODAL, BMP7, LEFTY1	178	62	16792	9.12939	0.520481	0.0646323	0.810343
MIR135A2		GOTERM_BP_DIRECT	GO:0060686~negative regulation of prostatic bud formation	3	0.00999733	0.000653739	WNT5A, BMP4, BMP7	178	4	16792	70.7528	0.625282	0.0785424	1.08077
ZIC5		GOTERM_BP_DIRECT	GO:0045766~positive regulation of angiogenesis	7	0.0233271	0.00137339	WNT5A, FLT1, NODAL, VASH2, FGF2, DDAH1, KDR	178	115	16792	5.74226	0.872912	0.146733	2.25781
HS3ST5		GOTERM_BP_DIRECT	GO:0048598~embryonic morphogenesis	3	0.00999733	0.00161176	FLRT3, FLT1, FGF2	178	6	16792	47.1685	0.911185	0.158815	2.64477
SOX21		GOTERM_BP_DIRECT	GO:0010862~positive regulation of pathway-restricted SMAD protein phosphorylation	5	0.0166622	0.00161725	BMP4, GDF3, NODAL, BMP7, LEFTY1	178	48	16792	9.82678	0.911916	0.149528	2.65367
CDH11		GOTERM_BP_DIRECT	GO:0007269~neurotransmitter secretion	5	0.0166622	0.00202681	NRXN3, SYT2, SYN3, UNC13A, LIN7A	178	51	16792	9.24873	0.952419	0.173316	3.31511
RAB3C		GOTERM_BP_DIRECT	GO:0060687~regulation of branching involved in prostate gland morphogenesis	3	0.00999733	0.00224084	BMP4, SFRP1, BMP7	178	7	16792	40.4302	0.965516	0.179691	3.65909
NEFL		GOTERM_BP_DIRECT	GO:0048771~tissue remodeling	3	0.00999733	0.00224084	LIPA, IL23A, THBS4	178	7	16792	40.4302	0.965516	0.179691	3.65909
NEFM		GOTERM_BP_DIRECT	GO:0010976~positive regulation of neuron projection development	6	0.0199947	0.00249973	WNT5A, RGMA, MAGI2, STMN2, DPYSL3, FEZ1	178	89	16792	6.3598	0.976641	0.18837	4.07363
ADCY2		GOTERM_BP_DIRECT	GO:0030534~adult behavior	4	0.0133298	0.00250459	SLC1A2, NRXN3, NLGN4X, SLITRK5	178	26	16792	14.5134	0.976812	0.179721	4.0814
KDR		GOTERM_BP_DIRECT	GO:0030182~neuron differentiation	6	0.0199947	0.00331759	WNT5A, FZD8, SOX11, NLGN4X, PCSK9, FZD7	178	95	16792	5.95813	0.993181	0.220731	5.37222
WNT5A		GOTERM_BP_DIRECT	GO:0010863~positive regulation of phospholipase C activity	3	0.00999733	0.00378848	FLT1, PDGFRA, FGF2	178	9	16792	31.4457	0.996645	0.237612	6.11237
DTNA		GOTERM_BP_DIRECT	GO:0009611~response to wounding	5	0.0166622	0.00438151	SLC1A2, NRP1, SOX2, FABP5, FN1	178	63	16792	7.48707	0.998627	0.258882	7.03677
FST		GOTERM_BP_DIRECT	GO:0072015~glomerular visceral epithelial cell development	3	0.00999733	0.00470288	BMP4, MAGI2, JAG1	178	10	16792	28.3011	0.999155	0.264819	7.53415
PHYH		GOTERM_BP_DIRECT	GO:0090009~primitive streak formation	3	0.00999733	0.00470288	WNT5A, GDF3, OTX2	178	10	16792	28.3011	0.999155	0.264819	7.53415
FEZ1		GOTERM_BP_DIRECT	GO:0060174~limb bud formation	3	0.00999733	0.00470288	SOX11, SEMA3C, SOX9	178	10	16792	28.3011	0.999155	0.264819	7.53415
CXCL12		GOTERM_BP_DIRECT	GO:0050919~negative chemotaxis	4	0.0133298	0.00541995	FLRT3, FLRT2, SEMA3C, EFNA5	178	34	16792	11.0985	0.999713	0.288155	8.63491
FLRT2		GOTERM_BP_DIRECT	GO:0003323~type B pancreatic cell development	3	0.00999733	0.0057083	WNT5A, BMP4, CDK6	178	11	16792	25.7283	0.999815	0.290864	9.07406
MAGI2		GOTERM_BP_DIRECT	GO:0050918~positive chemotaxis	4	0.0133298	0.0058827	BMP4, NRP1, CXCL12, FGF2	178	35	16792	10.7814	0.999857	0.288668	9.33871
GPR19		GOTERM_BP_DIRECT	GO:0006629~lipid metabolic process	7	0.0233271	0.00642506	SLC16A1, LIPA, FADS1, CLU, OSBPL10, FABP5, GDPD2	178	157	16792	4.20611	0.999937	0.301163	10.1571
BMP7		GOTERM_BP_DIRECT	GO:0045778~positive regulation of ossification	3	0.00999733	0.00680271	WNT5A, BMP4, SOX11	178	12	16792	23.5843	0.999964	0.306442	10.7229
LRIG1		GOTERM_BP_DIRECT	GO:0001756~somitogenesis	4	0.0133298	0.00796588	WNT5A, DLL3, SEMA3C, PCDH8	178	39	16792	9.6756	0.999994	0.338969	12.4444
TOX3		GOTERM_BP_DIRECT	GO:0003215~cardiac right ventricle morphogenesis	3	0.00999733	0.00798418	BMP4, SEMA3C, JAG1	178	13	16792	21.7701	0.999994	0.330402	12.4713
HHIP		GOTERM_BP_DIRECT	GO:0030509~BMP signaling pathway	5	0.0166622	0.00849333	BMP4, RGMA, RGMB, NODAL, BMP7	178	76	16792	6.20639	0.999997	0.338336	13.2148
PREX2		GOTERM_BP_DIRECT	GO:0030308~negative regulation of cell growth	6	0.0199947	0.00915418	SFRP1, BST2, FHL1, FBP1, GJA1, GNG4	178	121	16792	4.67787	0.999999	0.350379	14.171
SP8		GOTERM_BP_DIRECT	GO:0045666~positive regulation of neuron differentiation	5	0.0166622	0.00929153	BMP4, DAB1, SOX11, BMP7, DNMT3B	178	78	16792	6.04725	0.999999	0.345968	14.3685
GALNT3		GOTERM_BP_DIRECT	GO:0030154~cell differentiation	12	0.0399893	0.00998259	FLT1, LECT1, CADM1, FHL1, ZIC5, TDGF1, SH2B3, GPM6B, DLK1, ZIC3, SOHLH2, ZIC2	178	462	16792	2.45031	1	0.357839	15.3556
LOC645321		GOTERM_BP_DIRECT	GO:0060441~epithelial tube branching involved in lung morphogenesis	3	0.00999733	0.0106005	BMP4, HHIP, SOX9	178	15	16792	18.8674	1	0.366843	16.2292
LEFTY1		GOTERM_BP_DIRECT	GO:0050731~positive regulation of peptidyl-tyrosine phosphorylation	5	0.0166622	0.011031	NRP1, TDGF1, KITLG, EFNA5, THBS4	178	82	16792	5.75226	1	0.370285	16.8328
EFNA5		GOTERM_BP_DIRECT	GO:0043434~response to peptide hormone	4	0.0133298	0.0111104	GJA1, BMP7, CXCL12, NEFL	178	44	16792	8.5761	1	0.364437	16.9437
SEMA3C		GOTERM_BP_DIRECT	GO:0007399~nervous system development	9	0.029992	0.0112369	ZIC5, GPM6B, EFNA5, JAG1, FABP7, GAL, FGF2, OLFM1, FEZ1	178	287	16792	2.95831	1	0.360054	17.1201
ACTA1		GOTERM_BP_DIRECT	GO:0060070~canonical Wnt signaling pathway	5	0.0166622	0.0114964	WNT5A, FZD8, SFRP1, FZD7, TCF7L1	178	83	16792	5.68296	1	0.359194	17.4808
CTTNBP2		GOTERM_BP_DIRECT	GO:0030514~negative regulation of BMP signaling pathway	4	0.0133298	0.0118133	WNT5A, GDF3, SFRP1, SPG20	178	45	16792	8.38552	1	0.359774	17.9193
DLK1		GOTERM_BP_DIRECT	GO:0061036~positive regulation of cartilage development	3	0.00999733	0.0120316	WNT5A, BMP4, SOX9	178	16	16792	17.6882	1	0.357986	18.22
SOHLH2		GOTERM_BP_DIRECT	GO:0035162~embryonic hemopoiesis	3	0.00999733	0.0120316	SH2B3, KITLG, KDR	178	16	16792	17.6882	1	0.357986	18.22
FLRT3		GOTERM_BP_DIRECT	GO:0033189~response to vitamin A	3	0.00999733	0.0151304	RBP1, FADS1, DNMT3B	178	18	16792	15.7228	1	0.42008	22.3796
SLC1A2		GOTERM_BP_DIRECT	GO:0010975~regulation of neuron projection development	3	0.00999733	0.0167946	SFRP1, GRID2, DPYSL3	178	19	16792	14.8953	1	0.446352	24.5304
RGMA		GOTERM_BP_DIRECT	GO:0030198~extracellular matrix organization	7	0.0233271	0.0177959	MATN3, VCAN, NID1, SOX9, FGF2, KDR, FN1	178	196	16792	3.36918	1	0.458034	25.7975
GDF3		GOTERM_BP_DIRECT	GO:0042326~negative regulation of phosphorylation	3	0.00999733	0.0185328	CDKN1C, BMP4, BMP7	178	20	16792	14.1506	1	0.464188	26.7171
GJA1		GOTERM_BP_DIRECT	GO:0048146~positive regulation of fibroblast proliferation	4	0.0133298	0.0192802	WNT5A, PDGFRA, CDK6, FN1	178	54	16792	6.98793	1	0.470206	27.639
THBS2		GOTERM_BP_DIRECT	GO:0060548~negative regulation of cell death	4	0.0133298	0.0202381	BMP4, SOX11, BMP7, FGF2	178	55	16792	6.86088	1	0.479496	28.8045
MEGF10		GOTERM_BP_DIRECT	GO:0002542~Factor XII activation	2	0.00666489	0.020971	F12, KLKB1	178	2	16792	94.3371	1	0.48457	29.6842
SLITRK5		GOTERM_BP_DIRECT	GO:0010628~positive regulation of gene expression	8	0.0266596	0.0212573	SERPINB9, ACTA1, SOX11, GJA1, CDK6, DNMT3B, OLFM1, FN1	178	262	16792	2.88052	1	0.482211	30.0251
PRICKLE1		GOTERM_BP_DIRECT	GO:0008037~cell recognition	3	0.00999733	0.0222248	CADM1, VCAN, CD200	178	22	16792	12.8641	1	0.490698	31.1657
IGFBP7		GOTERM_BP_DIRECT	GO:0018108~peptidyl-tyrosine phosphorylation	6	0.0199947	0.0230806	EPHA4, FLT1, PDGFRA, ROR1, FGF2, KDR	178	153	16792	3.69949	1	0.497045	32.16
PCSK9		GOTERM_BP_DIRECT	GO:0035924~cellular response to vascular endothelial growth factor stimulus	3	0.00999733	0.0241752	NRP1, FLT1, KDR	178	23	16792	12.3048	1	0.506582	33.4121
CACHD1		GOTERM_BP_DIRECT	GO:0045662~negative regulation of myoblast differentiation	3	0.00999733	0.0241752	BMP4, GDF3, SOX9	178	23	16792	12.3048	1	0.506582	33.4121
SPG20		GOTERM_BP_DIRECT	GO:0001649~osteoblast differentiation	5	0.0166622	0.0243001	BMP4, SFRP1, SOX2, GJA1, VCAN	178	104	16792	4.53544	1	0.501772	33.5536
IQGAP2		GOTERM_BP_DIRECT	GO:0051216~cartilage development	4	0.0133298	0.0243277	WNT5A, LECT1, SOX9, BMP7	178	59	16792	6.39573	1	0.495699	33.5849
VASH2		GOTERM_BP_DIRECT	GO:0050679~positive regulation of epithelial cell proliferation	4	0.0133298	0.0254147	BMP4, SFRP1, NODAL, SOX9	178	60	16792	6.28914	1	0.504683	34.8037
NID1		GOTERM_BP_DIRECT	GO:0001947~heart looping	4	0.0133298	0.0265275	WNT5A, NODAL, GJA1, ZIC3	178	61	16792	6.18604	1	0.513555	36.0297
SALL3		GOTERM_BP_DIRECT	GO:0045944~positive regulation of transcription from RNA polymerase II promoter	18	0.059984	0.0301089	WNT5A, BMP4, FZD8, SOX11, NODAL, OTX2, SOX2, LDB2, JAG1, GAL, SOX9, ZIC3, SOHLH2, RGMA, IL23A, MEIS2, BMP7, FGF2	178	981	16792	1.73096	1	0.552934	39.8301
CLU		GOTERM_BP_DIRECT	GO:0048843~negative regulation of axon extension involved in axon guidance	3	0.00999733	0.030424	WNT5A, NRP1, SEMA3C	178	26	16792	10.885	1	0.550482	40.1541
EPHA4		GOTERM_BP_DIRECT	GO:0001525~angiogenesis	7	0.0233271	0.0310153	FZD8, NRP1, FLT1, NRXN3, JAG1, KDR, FN1	178	223	16792	2.96125	1	0.551365	40.7577
GRID2		GOTERM_BP_DIRECT	GO:0014068~positive regulation of phosphatidylinositol 3-kinase signaling	4	0.0133298	0.0312356	FLT1, PDGFRA, SOX9, KDR	178	65	16792	5.80536	1	0.54791	40.981
BST2		GOTERM_BP_DIRECT	GO:0072193~ureter smooth muscle cell differentiation	2	0.00666489	0.0312919	BMP4, SOX9	178	3	16792	62.8914	1	0.542643	41.038
TDGF1		GOTERM_BP_DIRECT	GO:0060978~angiogenesis involved in coronary vascular morphogenesis	2	0.00666489	0.0312919	NRP1, FGF2	178	3	16792	62.8914	1	0.542643	41.038
DDAH1		GOTERM_BP_DIRECT	GO:0021957~corticospinal tract morphogenesis	2	0.00666489	0.0312919	EPHA4, CDH11	178	3	16792	62.8914	1	0.542643	41.038
NODAL		GOTERM_BP_DIRECT	GO:0072125~negative regulation of glomerular mesangial cell proliferation	2	0.00666489	0.0312919	BMP4, BMP7	178	3	16792	62.8914	1	0.542643	41.038
IL23A		GOTERM_BP_DIRECT	GO:0033693~neurofilament bundle assembly	2	0.00666489	0.0312919	NEFL, NEFM	178	3	16792	62.8914	1	0.542643	41.038
FABP7		GOTERM_BP_DIRECT	GO:1900106~positive regulation of hyaluranon cable assembly	2	0.00666489	0.0312919	HAS3, BMP7	178	3	16792	62.8914	1	0.542643	41.038
PRDM14		GOTERM_BP_DIRECT	GO:0051788~response to misfolded protein	2	0.00666489	0.0312919	F12, CLU	178	3	16792	62.8914	1	0.542643	41.038
GNG4		GOTERM_BP_DIRECT	GO:0002244~hematopoietic progenitor cell differentiation	4	0.0133298	0.0324766	BMP4, SFRP1, PTPRZ1, FST	178	66	16792	5.7174	1	0.550356	42.2249
SFRP1		GOTERM_BP_DIRECT	GO:0048678~response to axon injury	3	0.00999733	0.0326343	FLRT3, DPYSL3, FGF2	178	27	16792	10.4819	1	0.546379	42.3811
ADAM28		GOTERM_BP_DIRECT	GO:0033077~T cell differentiation in thymus	3	0.00999733	0.0326343	FZD8, CDK6, FZD7	178	27	16792	10.4819	1	0.546379	42.3811
TSPAN3		GOTERM_BP_DIRECT	GO:0010800~positive regulation of peptidyl-threonine phosphorylation	3	0.00999733	0.0326343	WNT5A, BMP7, CALM1	178	27	16792	10.4819	1	0.546379	42.3811
OSBPL10		GOTERM_BP_DIRECT	GO:0040007~growth	3	0.00999733	0.0349056	BMP4, GDF3, BMP7	178	28	16792	10.1075	1	0.565376	44.5883
TRAF5		GOTERM_BP_DIRECT	GO:0016358~dendrite development	3	0.00999733	0.0349056	NRP1, DAB1, BMP7	178	28	16792	10.1075	1	0.565376	44.5883
OTX2		GOTERM_BP_DIRECT	GO:0005975~carbohydrate metabolic process	6	0.0199947	0.0372289	GALNT3, B3GAT1, PYGL, GFPT2, HHIP, HAS3	178	174	16792	3.253	1	0.583601	46.7638
SMPDL3B		GOTERM_BP_DIRECT	GO:0070374~positive regulation of ERK1 and ERK2 cascade	6	0.0199947	0.0380013	BMP4, NRP1, NODAL, PDGFRA, FGF2, KDR	178	175	16792	3.23441	1	0.585669	47.469
NRP1		GOTERM_BP_DIRECT	GO:0034504~protein localization to nucleus	3	0.00999733	0.0396253	BMP4, SOX9, BMP7	178	30	16792	9.43371	1	0.595778	48.9233
POLR3G		GOTERM_BP_DIRECT	GO:0071773~cellular response to BMP stimulus	3	0.00999733	0.0396253	BMP4, SFRP1, BMP7	178	30	16792	9.43371	1	0.595778	48.9233
SCCPDH		GOTERM_BP_DIRECT	GO:0001654~eye development	3	0.00999733	0.0396253	GDF3, MEIS2, SOX2	178	30	16792	9.43371	1	0.595778	48.9233
TSPAN5		GOTERM_BP_DIRECT	GO:0090184~positive regulation of kidney development	2	0.00666489	0.0415046	BMP4, SOX9	178	4	16792	47.1685	1	0.607692	50.559
AASS		GOTERM_BP_DIRECT	GO:0034653~retinoic acid catabolic process	2	0.00666489	0.0415046	CRABP1, CYP26A1	178	4	16792	47.1685	1	0.607692	50.559
TMEM158		GOTERM_BP_DIRECT	GO:0050672~negative regulation of lymphocyte proliferation	2	0.00666489	0.0415046	SOX11, GAL	178	4	16792	47.1685	1	0.607692	50.559
PYGL		GOTERM_BP_DIRECT	GO:0060393~regulation of pathway-restricted SMAD protein phosphorylation	2	0.00666489	0.0415046	BMP4, BMP7	178	4	16792	47.1685	1	0.607692	50.559
EPDR1		GOTERM_BP_DIRECT	GO:0003402~planar cell polarity pathway involved in axis elongation	2	0.00666489	0.0415046	WNT5A, MAGI2	178	4	16792	47.1685	1	0.607692	50.559
NKAIN4		GOTERM_BP_DIRECT	GO:0048859~formation of anatomical boundary	2	0.00666489	0.0415046	GDF3, NODAL	178	4	16792	47.1685	1	0.607692	50.559
SLC16A9		GOTERM_BP_DIRECT	GO:0021891~olfactory bulb interneuron development	2	0.00666489	0.0415046	SALL3, WNT5A	178	4	16792	47.1685	1	0.607692	50.559
DAB1		GOTERM_BP_DIRECT	GO:0051919~positive regulation of fibrinolysis	2	0.00666489	0.0415046	F12, KLKB1	178	4	16792	47.1685	1	0.607692	50.559
EDIL3		GOTERM_BP_DIRECT	GO:0010453~regulation of cell fate commitment	2	0.00666489	0.0415046	BMP4, GDF3	178	4	16792	47.1685	1	0.607692	50.559
SLCO3A1		GOTERM_BP_DIRECT	GO:0043552~positive regulation of phosphatidylinositol 3-kinase activity	3	0.00999733	0.0420707	FLT1, PDGFRA, FGF2	178	31	16792	9.12939	1	0.607414	51.042
MATN3		GOTERM_BP_DIRECT	GO:0045765~regulation of angiogenesis	3	0.00999733	0.0420707	SFRP1, VASH2, FGF2	178	31	16792	9.12939	1	0.607414	51.042
IRX2		GOTERM_BP_DIRECT	GO:0048701~embryonic cranial skeleton morphogenesis	3	0.00999733	0.0420707	BMP4, NODAL, PDGFRA	178	31	16792	9.12939	1	0.607414	51.042
PEA15		GOTERM_BP_DIRECT	GO:0030335~positive regulation of cell migration	6	0.0199947	0.0454761	BMP4, FLT1, TDGF1, PDGFRA, SEMA3C, KDR	178	184	16792	3.07621	1	0.631386	53.8551
HS3ST3A1		GOTERM_BP_DIRECT	GO:0030324~lung development	4	0.0133298	0.0462721	WNT5A, LIPA, FGF2, ZIC3	178	76	16792	4.96511	1	0.632704	54.4905
DLL3		GOTERM_BP_DIRECT	GO:0014066~regulation of phosphatidylinositol 3-kinase signaling	4	0.0133298	0.0493276	C3ORF58, PDGFRA, KITLG, FGF2	178	78	16792	4.8378	1	0.651659	56.8535
ROR1		GOTERM_BP_DIRECT	GO:0007275~multicellular organism development	11	0.0366569	0.0495776	WNT5A, CRABP1, SFRP1, BST2, OTX2, DLL3, VCAN, EDIL3, JAG1, SOHLH2, TMEM2	178	521	16792	1.99176	1	0.648496	57.0416
OLFM1		GOTERM_BP_DIRECT	GO:0001837~epithelial to mesenchymal transition	3	0.00999733	0.0497322	WNT5A, SOX9, BMP7	178	34	16792	8.32386	1	0.644668	57.1576
NEBL		GOTERM_BP_DIRECT	GO:0060666~dichotomous subdivision of terminal units involved in salivary gland branching	2	0.00666489	0.0516103	NRP1, SEMA3C	178	5	16792	37.7348	1	0.653718	58.5431
CRABP1		GOTERM_BP_DIRECT	GO:0038031~non-canonical Wnt signaling pathway via JNK cascade	2	0.00666489	0.0516103	WNT5A, FZD7	178	5	16792	37.7348	1	0.653718	58.5431
B3GAT1		GOTERM_BP_DIRECT	GO:0071504~cellular response to heparin	2	0.00666489	0.0516103	SFRP1, SOX9	178	5	16792	37.7348	1	0.653718	58.5431
CDK6		GOTERM_BP_DIRECT	GO:0007267~cell-cell signaling	7	0.0233271	0.0522767	NRP1, BST2, FADS1, FAT1, FJX1, GJA1, PCDH8	178	254	16792	2.59984	1	0.653694	59.0245
SYT2		GOTERM_BP_DIRECT	GO:0030501~positive regulation of bone mineralization	3	0.00999733	0.0523897	BMP4, GPM6B, BMP7	178	35	16792	8.08604	1	0.649706	59.1056
FZD7		GOTERM_BP_DIRECT	GO:0042060~wound healing	4	0.0133298	0.0524794	WNT5A, PDGFRA, FGF2, FN1	178	80	16792	4.71685	1	0.64561	59.1699
WLS		GOTERM_BP_DIRECT	GO:0001503~ossification	4	0.0133298	0.0524794	GPM6B, SOX9, BMP7, CDH11	178	80	16792	4.71685	1	0.64561	59.1699
SOX11		GOTERM_BP_DIRECT	GO:0008543~fibroblast growth factor receptor signaling pathway	4	0.0133298	0.0557262	GALNT3, FLRT3, FLRT2, FGF2	178	82	16792	4.60181	1	0.663596	61.4335
FLT1		GOTERM_BP_DIRECT	GO:0045786~negative regulation of cell cycle	3	0.00999733	0.0578522	BMP4, CDK6, BMP7	178	37	16792	7.64895	1	0.673105	62.8513
FAT1		GOTERM_BP_DIRECT	GO:0008285~negative regulation of cell proliferation	9	0.029992	0.0589184	BMP4, MAGI2, SFRP1, IGFBP7, CDK6, SKAP2, FABP7, BMP7, FGF2	178	396	16792	2.14402	1	0.675443	63.5437
THBS4		GOTERM_BP_DIRECT	GO:0001657~ureteric bud development	3	0.00999733	0.0606546	BMP4, SFRP1, BMP7	178	38	16792	7.44766	1	0.681895	64.6454
BMP4		GOTERM_BP_DIRECT	GO:0001942~hair follicle development	3	0.00999733	0.0606546	SOX21, LDB2, SOX9	178	38	16792	7.44766	1	0.681895	64.6454
TRIB2		GOTERM_BP_DIRECT	GO:0019933~cAMP-mediated signaling	3	0.00999733	0.0606546	ADCY2, SOX9, GAL	178	38	16792	7.44766	1	0.681895	64.6454
GPR176		GOTERM_BP_DIRECT	GO:0010564~regulation of cell cycle process	2	0.00666489	0.06161	SFRP1, SOX9	178	6	16792	31.4457	1	0.683356	65.2381
CD200		GOTERM_BP_DIRECT	GO:0003158~endothelium development	2	0.00666489	0.06161	GJA1, KDR	178	6	16792	31.4457	1	0.683356	65.2381
TCF7L1		GOTERM_BP_DIRECT	GO:0048681~negative regulation of axon regeneration	2	0.00666489	0.06161	EPHA4, RGMA	178	6	16792	31.4457	1	0.683356	65.2381
FN1		GOTERM_BP_DIRECT	GO:2000052~positive regulation of non-canonical Wnt signaling pathway	2	0.00666489	0.06161	WNT5A, SFRP1	178	6	16792	31.4457	1	0.683356	65.2381
UNC13A		GOTERM_BP_DIRECT	GO:0001822~kidney development	4	0.0133298	0.0624995	CDKN1C, BMP4, SOX11, PCSK9	178	86	16792	4.38777	1	0.684385	65.7816
DNMT3B		GOTERM_BP_DIRECT	GO:0007165~signal transduction	19	0.0633164	0.0643886	NRP1, MAGI2, CRABP1, NRXN3, LRRN2, FST, KITLG, IQGAP2, GJA1, RASSF8, SKAP2, SOX9, CXCL12, SALL3, RGMB, SH2B3, FGF2, TRAF5, DTNA	178	1161	16792	1.54385	1	0.691269	66.9096
TMEM47		GOTERM_BP_DIRECT	GO:0046426~negative regulation of JAK-STAT cascade	3	0.00999733	0.0663951	FLRT3, FLRT2, DAB1	178	40	16792	7.07528	1	0.698531	68.0692
CADM1		GOTERM_BP_DIRECT	GO:0006776~vitamin A metabolic process	2	0.00666489	0.0715048	LRAT, RBP1	178	7	16792	26.9535	1	0.721961	70.8523
GYLTL1B		GOTERM_BP_DIRECT	GO:0085029~extracellular matrix assembly	2	0.00666489	0.0715048	GPM6B, HAS3	178	7	16792	26.9535	1	0.721961	70.8523
LOC100505501		GOTERM_BP_DIRECT	GO:0008595~anterior/posterior axis specification, embryo	2	0.00666489	0.0715048	WNT5A, TDGF1	178	7	16792	26.9535	1	0.721961	70.8523
GDAP1		GOTERM_BP_DIRECT	GO:0048842~positive regulation of axon extension involved in axon guidance	2	0.00666489	0.0715048	NRP1, CXCL12	178	7	16792	26.9535	1	0.721961	70.8523
SOX9		GOTERM_BP_DIRECT	GO:0001658~branching involved in ureteric bud morphogenesis	3	0.00999733	0.0723083	BMP4, SOX9, FGF2	178	42	16792	6.73836	1	0.722022	71.2686
SERTAD4		GOTERM_BP_DIRECT	GO:0045599~negative regulation of fat cell differentiation	3	0.00999733	0.0723083	WNT5A, JAG1, TRIB2	178	42	16792	6.73836	1	0.722022	71.2686
SERPINB9		GOTERM_BP_DIRECT	GO:0022008~neurogenesis	3	0.00999733	0.0723083	SALL3, PCSK9, FABP7	178	42	16792	6.73836	1	0.722022	71.2686
PDZD4		GOTERM_BP_DIRECT	GO:0060071~Wnt signaling pathway, planar cell polarity pathway	4	0.0133298	0.0733368	WNT5A, PRICKLE1, ROR1, FZD7	178	92	16792	4.10161	1	0.723222	71.7934
JAG1		GOTERM_BP_DIRECT	GO:0042981~regulation of apoptotic process	6	0.0199947	0.0751687	GDF3, PEA15, SOX9, BMP7, TRAF5, LEFTY1	178	213	16792	2.65738	1	0.728357	72.7058
CGNL1		GOTERM_BP_DIRECT	GO:0008584~male gonad development	4	0.0133298	0.0771238	WNT5A, SFRP1, KITLG, SOX9	178	94	16792	4.01434	1	0.733892	73.6489
NLGN4X		GOTERM_BP_DIRECT	GO:0030336~negative regulation of cell migration	4	0.0133298	0.079049	MAGI2, SFRP1, BST2, DPYSL3	178	95	16792	3.97209	1	0.739078	74.5476
RGMB		GOTERM_BP_DIRECT	GO:0032926~negative regulation of activin receptor signaling pathway	2	0.00666489	0.0812959	MAGI2, FST	178	8	16792	23.5843	1	0.745515	75.56
TMEM2		GOTERM_BP_DIRECT	GO:0071711~basement membrane organization	2	0.00666489	0.0812959	FLRT2, NID1	178	8	16792	23.5843	1	0.745515	75.56
SKAP2		GOTERM_BP_DIRECT	GO:0045839~negative regulation of mitotic nuclear division	2	0.00666489	0.0812959	BMP4, BMP7	178	8	16792	23.5843	1	0.745515	75.56
JPH1		GOTERM_BP_DIRECT	GO:1904322~cellular response to forskolin	2	0.00666489	0.0812959	ADCY2, EFNA5	178	8	16792	23.5843	1	0.745515	75.56
TBC1D16		GOTERM_BP_DIRECT	GO:0006002~fructose 6-phosphate metabolic process	2	0.00666489	0.0812959	GFPT2, FBP1	178	8	16792	23.5843	1	0.745515	75.56
RASSF8		GOTERM_BP_DIRECT	GO:0040036~regulation of fibroblast growth factor receptor signaling pathway	2	0.00666489	0.0812959	OTX2, HHIP	178	8	16792	23.5843	1	0.745515	75.56
ECI2		GOTERM_BP_DIRECT	GO:0003151~outflow tract morphogenesis	3	0.00999733	0.0846145	BMP4, SOX11, SEMA3C	178	46	16792	6.15242	1	0.756281	76.9864
GAL		GOTERM_BP_DIRECT	GO:0007156~homophilic cell adhesion via plasma membrane adhesion molecules	5	0.0166622	0.0859767	CADM1, FAT1, PCDH8, CD200, CDH11	178	158	16792	2.98535	1	0.758384	77.5489
MARCKS		GOTERM_BP_DIRECT	GO:0009267~cellular response to starvation	3	0.00999733	0.0877843	SFRP1, FADS1, PCSK9	178	47	16792	6.02152	1	0.762257	78.2753
HAS3		GOTERM_BP_DIRECT	GO:0032956~regulation of actin cytoskeleton organization	3	0.00999733	0.0877843	BST2, GPM6B, EFNA5	178	47	16792	6.02152	1	0.762257	78.2753
C3orf58		GOTERM_BP_DIRECT	GO:0030903~notochord development	2	0.00666489	0.0909844	GDF3, SOX9	178	9	16792	20.9638	1	0.77148	79.5076
RBP1		GOTERM_BP_DIRECT	GO:0007494~midgut development	2	0.00666489	0.0909844	WNT5A, DAB1	178	9	16792	20.9638	1	0.77148	79.5076
VCAN		GOTERM_BP_DIRECT	GO:0031638~zymogen activation	2	0.00666489	0.0909844	F12, KLKB1	178	9	16792	20.9638	1	0.77148	79.5076
CNKSR2		GOTERM_BP_DIRECT	GO:0048812~neuron projection morphogenesis	3	0.00999733	0.0909891	GJA1, BMP7, NEFL	178	48	16792	5.89607	1	0.768031	79.5094
LECT1		GOTERM_BP_DIRECT	GO:0090090~negative regulation of canonical Wnt signaling pathway	5	0.0166622	0.0939394	WNT5A, SFRP1, PRICKLE1, SOX2, SOX9	178	163	16792	2.89378	1	0.775904	80.5869
COTL1		GOTERM_BP_DIRECT	GO:0071560~cellular response to transforming growth factor beta stimulus	3	0.00999733	0.0942279	WNT5A, SFRP1, SOX9	178	49	16792	5.77574	1	0.773612	80.6894
RAI14		GOTERM_BP_DIRECT	GO:0007157~heterophilic cell-cell adhesion via plasma membrane cell adhesion molecules	3	0.00999733	0.0974997	CADM1, GRID2, CD200	178	50	16792	5.66022	1	0.782286	81.8163
LIPA
PDGFRA
FADS1
EFHD2
SH2B3
F12
AKAP2
MAL2
FABP5
LIN7A
RND3
PTGER3
LRAT
SLC16A1
FJX1
SYN3
SFXN1
MIAT
FGF2
CHML
KLHL13
CALM1
LRRN2
GPM6B
DPYSL3
FZD8

## Sheet: 7. G3SAd2 B>D
GSTA2		Category	Term	Count	%	PValue	Genes	List Total	Pop Hits	Pop Total	Fold Enrichment	Bonferroni	Benjamini	FDR
WNT5B		KEGG_PATHWAY	hsa04550:Signaling pathways regulating pluripotency of stem cells	10	0.0356633	3.15002e-05	WNT2, SMAD9, WNT3, WNT5B, HAND1, TBX3, ID1, IGF1, ID3, ISL1	81	140	6879	6.06614	0.00430629	0.00430629	0.0370195
EVX1		KEGG_PATHWAY	hsa05410:Hypertrophic cardiomyopathy (HCM)	6	0.021398	0.00204014	ITGA9, ACTC1, SGCG, MYL3, PRKAB2, IGF1	81	78	6879	6.53276	0.244053	0.130548	2.37188
HAPLN1		KEGG_PATHWAY	hsa00480:Glutathione metabolism	5	0.0178317	0.00279987	GSTA1, ODC1, GSTA2, GSTA3, GSTM3	81	51	6879	8.32607	0.31895	0.120182	3.24191
HAND1		KEGG_PATHWAY	hsa05414:Dilated cardiomyopathy	5	0.0178317	0.0162095	ITGA9, ACTC1, SGCG, MYL3, IGF1	81	84	6879	5.05511	0.893424	0.428634	17.4768
SLCO2A1		KEGG_PATHWAY	hsa04350:TGF-beta signaling pathway	5	0.0178317	0.0162095	SMAD9, ID1, SMAD6, ID3, BAMBI	81	84	6879	5.05511	0.893424	0.428634	17.4768
TBX3		KEGG_PATHWAY	hsa05217:Basal cell carcinoma	4	0.0142653	0.0245666	WNT2, WNT3, WNT5B, SUFU	81	54	6879	6.29081	0.966881	0.494159	25.3505
CDX2		KEGG_PATHWAY	hsa00561:Glycerolipid metabolism	4	0.0142653	0.0295723	LPL, DGKD, ALDH2, PNPLA3	81	58	6879	5.85696	0.983634	0.496122	29.7311
RGS5		KEGG_PATHWAY	hsa00982:Drug metabolism - cytochrome P450	4	0.0142653	0.0442551	GSTA1, GSTA2, GSTA3, GSTM3	81	68	6879	4.99564	0.997973	0.587651	41.2597
GSTA1		KEGG_PATHWAY	hsa00980:Metabolism of xenobiotics by cytochrome P450	4	0.0142653	0.0545107	GSTA1, GSTA2, GSTA3, GSTM3	81	74	6879	4.59059	0.999538	0.61707	48.2556
TMPRSS11E		KEGG_PATHWAY	hsa04360:Axon guidance	5	0.0178317	0.0599486	UNC5B, CXCR4, EFNA1, EFNB1, EPHB1	81	127	6879	3.34354	0.99979	0.609782	51.6474
DLX2		KEGG_PATHWAY	hsa05204:Chemical carcinogenesis	4	0.0142653	0.0658018	GSTA1, GSTA2, GSTA3, GSTM3	81	80	6879	4.2463	0.999911	0.606437	55.0701
GATA2		KEGG_PATHWAY	hsa05166:HTLV-I infection	7	0.0249643	0.0744057	WNT2, MSX2, MSX1, WNT3, WNT5B, HLA-DRB1, HLA-DPB1	81	254	6879	2.34048	0.999975	0.618245	59.7002
CXCL14		KEGG_PATHWAY	hsa04310:Wnt signaling pathway	5	0.0178317	0.0763865	WNT2, WNT3, WNT5B, SOX17, BAMBI	81	138	6879	3.07703	0.999981	0.596341	60.7023
MSX1		KEGG_PATHWAY	hsa05323:Rheumatoid arthritis	4	0.0142653	0.082379	CTSL, TNFRSF11A, HLA-DRB1, HLA-DPB1	81	88	6879	3.86027	0.999992	0.595862	63.5968
HOXD1		KEGG_PATHWAY	hsa05205:Proteoglycans in cancer	6	0.021398	0.0826805	WNT2, CTSL, WNT3, WNT5B, IGF1, TIMP3	81	200	6879	2.54778	0.999993	0.570228	63.7372
MSX2		KEGG_PATHWAY	hsa04390:Hippo signaling pathway	5	0.0178317	0.0984372	WNT2, WNT3, WNT5B, ID1, SNAI2	81	151	6879	2.81212	0.999999	0.611882	70.4188
OLFM4
WNT2		Category	Term	Count	%	PValue	Genes	List Total	Pop Hits	Pop Total	Fold Enrichment	Bonferroni	Benjamini	FDR
TAC3		GOTERM_BP_DIRECT	GO:0000122~negative regulation of transcription from RNA polymerase II promoter	23	0.0820257	3.06874e-06	CDX2, TBX3, EFNA1, EDN1, ZHX2, SNAI2, ISL1, SUFU, NOC2L, MSX2, T, DLX2, GATA2, MSX1, PDE2A, HAND1, ID1, TFAP2A, BHLHE40, ID3, SOX17, HDAC9, RUNX3	169	720	16792	3.17403	0.00388972	0.00388972	0.00499601
SLC16A4		GOTERM_BP_DIRECT	GO:0030182~neuron differentiation	9	0.032097	4.93097e-06	WNT2, IER2, WNT3, WNT5B, ID1, TRPC5, HOXD1, ID3, HDAC9	169	95	16792	9.41314	0.00624278	0.00312627	0.00802767
PSTPIP2		GOTERM_BP_DIRECT	GO:0008284~positive regulation of cell proliferation	17	0.0606277	1.84044e-05	ODC1, CDX2, NTF3, TBX3, TRPC5, EDN1, CST3, IGF1, ISL1, WNT2, T, TNFRSF11A, SP6, RAB25, GRK5, BAMBI, SERTAD1	169	466	16792	3.62476	0.0231028	0.00776101	0.0299595
KANK4		GOTERM_BP_DIRECT	GO:0030198~extracellular matrix organization	10	0.0356633	0.000160326	ITGA9, HAPLN1, SMOC2, COL9A2, COL9A3, COL27A1, SPINT1, POSTN, VWA1, FURIN	169	196	16792	5.06944	0.184236	0.0496335	0.260703
LOC389332		GOTERM_BP_DIRECT	GO:0035115~embryonic forelimb morphogenesis	5	0.0178317	0.000279347	MSX2, MSX1, WNT3, TBX3, TFAP2A	169	32	16792	15.5251	0.2987	0.0685045	0.453827
TFAP2A		GOTERM_BP_DIRECT	GO:0023019~signal transduction involved in regulation of gene expression	4	0.0142653	0.000847217	MSX2, T, MSX1, SOX17	169	19	16792	20.9181	0.659187	0.164232	1.37044
SOX17		GOTERM_BP_DIRECT	GO:0007267~cell-cell signaling	10	0.0356633	0.00105231	WNT2, BARX1, TNFRSF11A, NTF3, CXCL14, EFNA1, EFNB1, EDN1, FGF16, TRH	169	254	16792	3.91185	0.737404	0.173884	1.69953
SAMD11		GOTERM_BP_DIRECT	GO:1901687~glutathione derivative biosynthetic process	4	0.0142653	0.00131713	GSTA1, GSTA2, GSTA3, GSTM3	169	22	16792	18.0656	0.812477	0.188793	2.12293
POSTN		GOTERM_BP_DIRECT	GO:0060536~cartilage morphogenesis	3	0.010699	0.00145366	MSX1, HAND1, SNAI2	169	6	16792	49.6805	0.842368	0.185578	2.34056
IGF1		GOTERM_BP_DIRECT	GO:0060070~canonical Wnt signaling pathway	6	0.021398	0.00146205	WNT2, T, WNT3, SOX17, PTPRU, SNAI2	169	83	16792	7.18272	0.844041	0.169574	2.35392
MFSD7		GOTERM_BP_DIRECT	GO:0008152~metabolic process	8	0.0285307	0.00151963	GSTA1, GSTA2, GSTA3, GSTM3, PDE2A, SULF1, FGF16, ECHDC2	169	168	16792	4.73147	0.855054	0.161031	2.44555
PEG10		GOTERM_BP_DIRECT	GO:0007507~heart development	8	0.0285307	0.00246973	APLNR, GATA2, HAND1, ID1, EDN1, HEG1, ID3, HDAC9	169	183	16792	4.34365	0.956736	0.230261	3.94592
DMRTA2		GOTERM_BP_DIRECT	GO:0061180~mammary gland epithelium development	3	0.010699	0.00267798	WNT2, MSX1, WNT3	169	8	16792	37.2604	0.966813	0.230465	4.27186
IRX6		GOTERM_BP_DIRECT	GO:0044351~macropinocytosis	3	0.010699	0.00267798	DOCK2, PYCARD, MAPKAPK2	169	8	16792	37.2604	0.966813	0.230465	4.27186
PRSS12		GOTERM_BP_DIRECT	GO:0035116~embryonic hindlimb morphogenesis	4	0.0142653	0.00268141	MSX2, MSX1, WNT3, TBX3	169	28	16792	14.1944	0.966958	0.216174	4.27722
LPL		GOTERM_BP_DIRECT	GO:0043433~negative regulation of sequence-specific DNA binding transcription factor activity	5	0.0178317	0.00304911	HAND1, ID1, BHLHE40, ID3, SUFU	169	60	16792	8.28008	0.979314	0.227831	4.85019
CRHBP		GOTERM_BP_DIRECT	GO:0051091~positive regulation of sequence-specific DNA binding transcription factor activity	6	0.021398	0.00407962	WNT2, TRIM38, TNFRSF11A, EDN1, PYCARD, MID2	169	105	16792	5.67777	0.994438	0.277098	6.43885
SNAI2		GOTERM_BP_DIRECT	GO:0001775~cell activation	3	0.010699	0.00515755	LYPD1, CST3, IGF1	169	11	16792	27.0984	0.998594	0.320431	8.07396
LOC105371455		GOTERM_BP_DIRECT	GO:0003198~epithelial to mesenchymal transition involved in endocardial cushion formation	3	0.010699	0.00721895	MSX2, MSX1, SNAI2	169	13	16792	22.9294	0.999899	0.400215	11.1265
PRTG		GOTERM_BP_DIRECT	GO:0001525~angiogenesis	8	0.0285307	0.00723956	SHB, HAND1, UNC5B, ID1, MYDGF, EFNA1, SOX17, EPHB1	169	223	16792	3.56452	0.999902	0.384714	11.1565
NPFF		GOTERM_BP_DIRECT	GO:0051092~positive regulation of NF-kappaB transcription factor activity	6	0.021398	0.0108747	RPS6KA5, TRIM38, TNFRSF11A, PYCARD, EDA, MID2	169	133	16792	4.48245	0.999999	0.500589	16.3072
ISL1		GOTERM_BP_DIRECT	GO:0006915~apoptotic process	13	0.0463623	0.0117627	ACTC1, SGK1, MYDGF, CST3, BCL2L12, NOC2L, SHB, PEG10, UNC5B, CXCR4, SULF1, PYCARD, GRK5	169	567	16792	2.27812	1	0.511092	17.5222
EPHB1		GOTERM_BP_DIRECT	GO:0007517~muscle organ development	5	0.0178317	0.012219	MSX1, SGCG, IGF1, SGCE, ID3	169	89	16792	5.58208	1	0.508216	18.14
COL9A2		GOTERM_BP_DIRECT	GO:0001501~skeletal system development	6	0.021398	0.0122465	HAPLN1, COL9A2, TBX3, IGF1, POSTN, SUFU	169	137	16792	4.35157	1	0.493583	18.1771
APLNR		GOTERM_BP_DIRECT	GO:0071560~cellular response to transforming growth factor beta stimulus	4	0.0142653	0.0129428	WNT2, PDE2A, EDN1, POSTN	169	49	16792	8.1111	1	0.498104	19.1112
DOCK2		GOTERM_BP_DIRECT	GO:0007179~transforming growth factor beta receptor signaling pathway	5	0.0178317	0.0136664	SMAD9, ID1, SMAD6, BAMBI, FURIN	169	92	16792	5.40005	1	0.502939	20.0712
KYNU		GOTERM_BP_DIRECT	GO:0019886~antigen processing and presentation of exogenous peptide antigen via MHC class II	5	0.0178317	0.0136664	CTSL, AP1M2, HLA-DRB1, HLA-DPB1, CTSV	169	92	16792	5.40005	1	0.502939	20.0712
KRT16		GOTERM_BP_DIRECT	GO:0035066~positive regulation of histone acetylation	3	0.010699	0.0137044	RPS6KA5, ISL1, SNAI2	169	18	16792	16.5602	1	0.490352	20.1212
DUSP2		GOTERM_BP_DIRECT	GO:0042475~odontogenesis of dentin-containing tooth	4	0.0142653	0.0176478	DLX2, MSX1, HAND1, EDA	169	55	16792	7.22625	1	0.567213	25.1649
MUM1L1		GOTERM_BP_DIRECT	GO:0006749~glutathione metabolic process	4	0.0142653	0.0185126	GSTA1, GSTA2, GSTA3, GSTM3	169	56	16792	7.09721	1	0.571536	26.2304
LOC101928202		GOTERM_BP_DIRECT	GO:2001055~positive regulation of mesenchymal cell apoptotic process	2	0.00713267	0.01991	MSX2, MSX1	169	2	16792	99.3609	1	0.585515	27.9219
SP6		GOTERM_BP_DIRECT	GO:0090427~activation of meiosis	2	0.00713267	0.01991	MSX2, MSX1	169	2	16792	99.3609	1	0.585515	27.9219
BAMBI		GOTERM_BP_DIRECT	GO:0051216~cartilage development	4	0.0142653	0.0212464	DLX2, SMAD9, EDN1, SULF1	169	59	16792	6.73634	1	0.597123	29.5054
HLA-DRB1		GOTERM_BP_DIRECT	GO:0045662~negative regulation of myoblast differentiation	3	0.010699	0.0219349	TBX3, CXCL14, ID3	169	23	16792	12.9601	1	0.596921	30.3084
PRSS23		GOTERM_BP_DIRECT	GO:0003148~outflow tract septum morphogenesis	3	0.010699	0.0219349	MSX2, SMAD6, ISL1	169	23	16792	12.9601	1	0.596921	30.3084
T		GOTERM_BP_DIRECT	GO:0000187~activation of MAPK activity	5	0.0178317	0.0225166	NTF3, CXCR4, EFNA1, IGF1, MAPKAPK2	169	107	16792	4.64303	1	0.59499	30.9803
BARX1		GOTERM_BP_DIRECT	GO:0001947~heart looping	4	0.0142653	0.0231852	HAND1, TBX3, SOX17, SUFU	169	61	16792	6.51547	1	0.594561	31.7448
ANO2		GOTERM_BP_DIRECT	GO:0007165~signal transduction	20	0.0713267	0.023321	DEPDC7, NTF3, PDPN, CRHBP, PRKAB2, FGF16, S100A11, IGF1, TRH, GPRC5A, SUFU, SHB, SMOC2, T, TNFRSF11A, PDE2A, CXCL14, UNC5B, DGKD, PYCARD	169	1161	16792	1.71164	1	0.585809	31.8992
LCP1		GOTERM_BP_DIRECT	GO:0055010~ventricular cardiac muscle tissue morphogenesis	3	0.010699	0.0256738	HAND1, MYL3, ISL1	169	25	16792	11.9233	1	0.610838	34.5215
ACADL		GOTERM_BP_DIRECT	GO:0045892~negative regulation of transcription, DNA-templated	11	0.0392297	0.0287065	RPS6KA5, MSX2, ZNF552, HAND1, TBX3, ID1, ZHX2, TFAP2A, BHLHE40, ID3, HDAC9	169	499	16792	2.19032	1	0.642107	37.7618
TNFRSF11A		GOTERM_BP_DIRECT	GO:0060349~bone morphogenesis	3	0.010699	0.0296511	T, MSX1, TFAP2A	169	27	16792	11.0401	1	0.644115	38.74
WNT3		GOTERM_BP_DIRECT	GO:0002277~myeloid dendritic cell activation involved in immune response	2	0.00713267	0.0297168	DOCK2, PYCARD	169	3	16792	66.2406	1	0.635133	38.8074
SULF1		GOTERM_BP_DIRECT	GO:0035880~embryonic nail plate morphogenesis	2	0.00713267	0.0297168	MSX2, MSX1	169	3	16792	66.2406	1	0.635133	38.8074
SYTL5		GOTERM_BP_DIRECT	GO:0021983~pituitary gland development	3	0.010699	0.0317257	GATA2, MSX1, ISL1	169	28	16792	10.6458	1	0.650014	40.8378
OLFM3		GOTERM_BP_DIRECT	GO:0003281~ventricular septum development	3	0.010699	0.0317257	SMAD6, HEG1, SUFU	169	28	16792	10.6458	1	0.650014	40.8378
ITGA9		GOTERM_BP_DIRECT	GO:0030855~epithelial cell differentiation	4	0.0142653	0.0330577	GSTA1, GSTA2, BARX1, ID3	169	70	16792	5.67777	1	0.656072	42.1491
EFNA1		GOTERM_BP_DIRECT	GO:0071300~cellular response to retinoic acid	4	0.0142653	0.0330577	WNT2, T, WNT3, WNT5B	169	70	16792	5.67777	1	0.656072	42.1491
LINC00960		GOTERM_BP_DIRECT	GO:0050766~positive regulation of phagocytosis	3	0.010699	0.0338558	GATA2, DOCK2, PYCARD	169	29	16792	10.2787	1	0.655915	42.9215
MFSD4		GOTERM_BP_DIRECT	GO:0048706~embryonic skeletal system development	3	0.010699	0.0360401	T, SULF1, HOXD1	169	30	16792	9.93609	1	0.670411	44.9866
TRPC5		GOTERM_BP_DIRECT	GO:0045944~positive regulation of transcription from RNA polymerase II promoter	17	0.0606277	0.0370091	FOSL2, EVX1, MYDGF, EDN1, IGF1, ISL1, BCL2L12, WNT2, RPS6KA5, GATA2, DLX2, BARX1, MSX1, HAND1, TFAP2A, SOX17, SERTAD1	169	981	16792	1.72185	1	0.671691	45.8801
SOWAHA		GOTERM_BP_DIRECT	GO:0006954~inflammatory response	9	0.032097	0.0370645	RPS6KA5, RARRES2, TNFRSF11A, CXCR4, KRT16, CRHBP, PYCARD, MAPKAPK2, HDAC9	169	379	16792	2.35949	1	0.663832	45.9307
SMAD6		GOTERM_BP_DIRECT	GO:0030335~positive regulation of cell migration	6	0.021398	0.0377232	WNT5B, NTF3, EDN1, IGF1, SNAI2, ATP8A1	169	184	16792	3.24003	1	0.662177	46.5298
TRH		GOTERM_BP_DIRECT	GO:0030513~positive regulation of BMP signaling pathway	3	0.010699	0.0382774	MSX2, MSX1, SULF1	169	31	16792	9.61558	1	0.65957	47.0289
PLA2G2A		GOTERM_BP_DIRECT	GO:1903026~negative regulation of RNA polymerase II regulatory region sequence-specific DNA binding	2	0.00713267	0.0394259	HAND1, ID1	169	4	16792	49.6805	1	0.662743	48.0495
FGF16		GOTERM_BP_DIRECT	GO:0060913~cardiac cell fate determination	2	0.00713267	0.0394259	SOX17, ISL1	169	4	16792	49.6805	1	0.662743	48.0495
PPAPDC1A		GOTERM_BP_DIRECT	GO:0014028~notochord formation	2	0.00713267	0.0394259	T, EFNA1	169	4	16792	49.6805	1	0.662743	48.0495
SHB		GOTERM_BP_DIRECT	GO:0050878~regulation of body fluid levels	2	0.00713267	0.0394259	APLNR, HEG1	169	4	16792	49.6805	1	0.662743	48.0495
ZC3H12C		GOTERM_BP_DIRECT	GO:0042481~regulation of odontogenesis	2	0.00713267	0.0394259	MSX1, SP6	169	4	16792	49.6805	1	0.662743	48.0495
SERTAD1		GOTERM_BP_DIRECT	GO:0021559~trigeminal nerve development	2	0.00713267	0.0394259	TFAP2A, ISL1	169	4	16792	49.6805	1	0.662743	48.0495
CADPS		GOTERM_BP_DIRECT	GO:1904954~canonical Wnt signaling pathway involved in midbrain dopaminergic neuron differentiation	2	0.00713267	0.0394259	WNT2, WNT3	169	4	16792	49.6805	1	0.662743	48.0495
ACTC1		GOTERM_BP_DIRECT	GO:0043066~negative regulation of apoptotic process	10	0.0356633	0.0396441	MSX2, ACTC1, MSX1, TBX3, ID1, MYDGF, SMAD6, TFAP2A, IGF1, GRK5	169	455	16792	2.18376	1	0.657085	48.2412
FOSL2		GOTERM_BP_DIRECT	GO:0061024~membrane organization	3	0.010699	0.0405664	SGCG, SGCE, TBC1D1	169	32	16792	9.31509	1	0.658134	49.0446
RUNX3		GOTERM_BP_DIRECT	GO:0022617~extracellular matrix disassembly	4	0.0142653	0.0406715	CTSL, FURIN, CTSV, LCP1	169	76	16792	5.22952	1	0.651686	49.1354
SGK1		GOTERM_BP_DIRECT	GO:0030509~BMP signaling pathway	4	0.0142653	0.0406715	T, SMAD9, ID1, SMAD6	169	76	16792	5.22952	1	0.651686	49.1354
MID2		GOTERM_BP_DIRECT	GO:0060021~palate development	4	0.0142653	0.0406715	MSX1, TBX3, TFAP2A, SNAI2	169	76	16792	5.22952	1	0.651686	49.1354
SLC7A3		GOTERM_BP_DIRECT	GO:0007204~positive regulation of cytosolic calcium ion concentration	5	0.0178317	0.0456864	GATA2, CXCR4, TRPC5, EDN1, NPFF	169	134	16792	3.7075	1	0.687918	53.2958
ID3		GOTERM_BP_DIRECT	GO:0008285~negative regulation of cell proliferation	9	0.032097	0.0459426	MSX2, MSX1, ADAMTS8, SMAD6, PEMT, S100A11, TFAP2A, PTPRU, FTH1	169	396	16792	2.2582	1	0.682937	53.4995
HEG1		GOTERM_BP_DIRECT	GO:0090074~negative regulation of protein homodimerization activity	2	0.00713267	0.0490386	ID1, ISL1	169	5	16792	39.7444	1	0.700267	55.8962
TIMP3		GOTERM_BP_DIRECT	GO:0098703~calcium ion import across plasma membrane	2	0.00713267	0.0490386	FAM155B, FAM155A	169	5	16792	39.7444	1	0.700267	55.8962
PYDC1		GOTERM_BP_DIRECT	GO:0034392~negative regulation of smooth muscle cell apoptotic process	2	0.00713267	0.0490386	EDN1, IGF1	169	5	16792	39.7444	1	0.700267	55.8962
DGKD		GOTERM_BP_DIRECT	GO:0009409~response to cold	3	0.010699	0.0502145	LPL, PCSK1N, TRH	169	36	16792	8.28008	1	0.702295	56.7757
SMOC2		GOTERM_BP_DIRECT	GO:0045668~negative regulation of osteoblast differentiation	3	0.010699	0.0579341	ID1, ID3, SUFU	169	39	16792	7.64315	1	0.747935	62.1536
AMOTL2		GOTERM_BP_DIRECT	GO:0061312~BMP signaling pathway involved in heart development	2	0.00713267	0.0585555	MSX2, MSX1	169	6	16792	33.1203	1	0.745492	62.558
SYNDIG1		GOTERM_BP_DIRECT	GO:0009887~organ morphogenesis	4	0.0142653	0.0648426	GATA2, CDX2, TBX3, FGF16	169	92	16792	4.32004	1	0.775462	66.4277
COL27A1		GOTERM_BP_DIRECT	GO:0046598~positive regulation of viral entry into host cell	2	0.00713267	0.0679778	P4HB, TRIM38	169	7	16792	28.3888	1	0.785938	68.2139
RAB31		GOTERM_BP_DIRECT	GO:0008595~anterior/posterior axis specification, embryo	2	0.00713267	0.0679778	T, TBX3	169	7	16792	28.3888	1	0.785938	68.2139
RASL10B		GOTERM_BP_DIRECT	GO:0061051~positive regulation of cell growth involved in cardiac muscle cell development	2	0.00713267	0.0679778	EDN1, IGF1	169	7	16792	28.3888	1	0.785938	68.2139
HABP4		GOTERM_BP_DIRECT	GO:0003183~mitral valve morphogenesis	2	0.00713267	0.0679778	EFNA1, SMAD6	169	7	16792	28.3888	1	0.785938	68.2139
LYPD1		GOTERM_BP_DIRECT	GO:0007411~axon guidance	5	0.0178317	0.0756304	RPS6KA5, WNT3, EFNA1, EFNB1, EPHB1	169	159	16792	3.12456	1	0.816002	72.2065
CTSV		GOTERM_BP_DIRECT	GO:0007217~tachykinin receptor signaling pathway	2	0.00713267	0.0773064	GRK5, TAC3	169	8	16792	24.8402	1	0.817869	73.0157
FAM43A		GOTERM_BP_DIRECT	GO:0003151~outflow tract morphogenesis	3	0.010699	0.0773758	TBX3, SOX17, ISL1	169	46	16792	6.48006	1	0.813006	73.0487
NTF3		GOTERM_BP_DIRECT	GO:0045165~cell fate commitment	3	0.010699	0.0773758	WNT2, WNT3, WNT5B	169	46	16792	6.48006	1	0.813006	73.0487
FAM155B		GOTERM_BP_DIRECT	GO:0032729~positive regulation of interferon-gamma production	3	0.010699	0.0773758	PYCARD, HLA-DPB1, ISL1	169	46	16792	6.48006	1	0.813006	73.0487
ITLN2		GOTERM_BP_DIRECT	GO:0045600~positive regulation of fat cell differentiation	3	0.010699	0.0803011	RARRES2, WNT5B, SNAI2	169	47	16792	6.34219	1	0.819979	74.4068
EFNB1		GOTERM_BP_DIRECT	GO:0002576~platelet degranulation	4	0.0142653	0.0844971	RARRES2, IGF1, HABP4, TIMP3	169	103	16792	3.85868	1	0.831302	76.2429
HEBP1		GOTERM_BP_DIRECT	GO:0090197~positive regulation of chemokine secretion	2	0.00713267	0.0865421	LPL, PYCARD	169	9	16792	22.0802	1	0.834075	77.0923
PYCARD		GOTERM_BP_DIRECT	GO:0050774~negative regulation of dendrite morphogenesis	2	0.00713267	0.0865421	ID1, TRPC5	169	9	16792	22.0802	1	0.834075	77.0923
PCSK1N		GOTERM_BP_DIRECT	GO:0001771~immunological synapse formation	2	0.00713267	0.0956859	DOCK2, EPHB1	169	10	16792	19.8722	1	0.859865	80.5533
NOC2L		GOTERM_BP_DIRECT	GO:0071356~cellular response to tumor necrosis factor	4	0.0142653	0.0981717	CRHBP, EDN1, PYCARD, POSTN	169	110	16792	3.61313	1	0.863078	81.4055
COL9A3
RARRES2
PNPLA3
MYL3
SGCG
LOC101927853
EDN1
UNC5B
DEPDC7
HLA-DPB1
ID1
KRT19
GPRC5A
CXCR4
UNC119
PTPRU
DNAJC1
TMEM243
ADAMTS8
GSTM3
TMEM37
BHLHE40
KCNC4
EPHX4
ECHDC2
GRK5
SYNGR1
STS
HDAC9
CYYR1
RRP9
TRIM38
FTH1
RBM24
FAM110B
SMAD9
ZHX2
CST3
CHD1L
EDA
PIFO
SGCE
AP1M2
PDE2A
PDPN
TBC1D1
SRSF12
RPS6KA5
IER2
SUFU
DUSP23
ALDH2
CTSL
ATP8A1
PHKA1
CERS6
RHOBTB3
S100A11
FAM155A
VWA1
HERC5
MYDGF
GSTA3
ST7
GTF3A
PRKAB2
ODC1
SPINT1
SEPT8
C19orf43
P4HB
OBSL1
NT5C3B
LOC729737
C19orf70
PEMT
RAB25
REPIN1
BCL2L12
SPATA5L1
C19orf53
TCP11L1
ZNF552
MAPKAPK2
FURIN

## Sheet: 8. G3SAd2 D>B
RBGpA		Category	Term	Count	%	PValue	Genes	List Total	Pop Hits	Pop Total	Fold Enrichment	Bonferroni	Benjamini	FDR
SOX2		KEGG_PATHWAY	hsa04550:Signaling pathways regulating pluripotency of stem cells	10	0.0195412	0.00101435	FGFR2, WNT5A, BMI1, MAP2K1, PIK3CD, SOX2, FZD5, FGF2, FZD7, ZIC3	127	140	6879	3.86895	0.193581	0.193581	1.27595
FGFBP3		KEGG_PATHWAY	hsa04015:Rap1 signaling pathway	12	0.0234494	0.00154835	FGF19, FGFR2, MAGI2, ADCY7, MAP2K1, PIK3CD, EFNA5, FGF12, FGF2, MAP2K6, KDR, CALM1	127	210	6879	3.09516	0.28	0.151472	1.94162
ZIC3		KEGG_PATHWAY	hsa05200:Pathways in cancer	17	0.03322	0.00206678	WNT5A, FGFR2, FGF19, ADCY7, MAP2K1, ERBB2, STAT5B, PIK3CD, FGF12, FZD5, CXCL12, TCF7L1, FZD7, SOS2, HHIP, GNG4, FGF2	127	393	6879	2.34303	0.355068	0.136018	2.58393
SOX2-OT		KEGG_PATHWAY	hsa04916:Melanogenesis	8	0.0156329	0.00228699	WNT5A, ADCY7, MAP2K1, CREB3L1, FZD5, FZD7, TCF7L1, CALM1	127	100	6879	4.33323	0.384547	0.114275	2.85559
FBP1		KEGG_PATHWAY	hsa04931:Insulin resistance	8	0.0156329	0.00353219	IRS2, PYGL, PIK3CD, GFPT2, TBC1D4, GYS2, CREB3L1, CPT1A	127	108	6879	4.01225	0.527704	0.139318	4.37861
PGA5		KEGG_PATHWAY	hsa05205:Proteoglycans in cancer	11	0.0214953	0.0035433	WNT5A, CAV1, ANK2, MAP2K1, ERBB2, PIK3CD, SOS2, FZD5, FGF2, FZD7, KDR	127	200	6879	2.97909	0.52882	0.117873	4.3921
TOX		KEGG_PATHWAY	hsa04910:Insulin signaling pathway	9	0.0175871	0.00368484	IRS2, SORBS1, MAP2K1, PYGL, PIK3CD, SOS2, FBP1, GYS2, CALM1	127	138	6879	3.53252	0.542798	0.105781	4.5638
USP44		KEGG_PATHWAY	hsa05215:Prostate cancer	7	0.0136788	0.00533747	FGFR2, MAP2K1, ERBB2, PIK3CD, SOS2, CREB3L1, TCF7L1	127	88	6879	4.30861	0.678441	0.132224	6.54765
ADAM28		KEGG_PATHWAY	hsa04014:Ras signaling pathway	11	0.0214953	0.00828943	FGF19, FGFR2, MAP2K1, PIK3CD, SOS2, EFNA5, FGF12, GNG4, FGF2, KDR, CALM1	127	226	6879	2.63637	0.828759	0.17805	9.99701
GALNT16		KEGG_PATHWAY	hsa04320:Dorso-ventral axis formation	4	0.00781647	0.0127346	FMN2, NOTCH1, MAP2K1, SOS2	127	27	6879	8.0245	0.933932	0.237922	14.9705
NID1		KEGG_PATHWAY	hsa04810:Regulation of actin cytoskeleton	10	0.0195412	0.0146374	FGF19, FGFR2, ARHGEF4, MAP2K1, PIK3CD, SOS2, IQGAP2, FGF12, PIP4K2A, FGF2	127	210	6879	2.5793	0.95611	0.247375	17.0211
LECT1		KEGG_PATHWAY	hsa05213:Endometrial cancer	5	0.00977059	0.0147563	MAP2K1, ERBB2, PIK3CD, SOS2, TCF7L1	127	52	6879	5.20821	0.957218	0.230979	17.1476
STMN2		KEGG_PATHWAY	hsa05217:Basal cell carcinoma	5	0.00977059	0.0167643	WNT5A, HHIP, FZD5, FZD7, TCF7L1	127	54	6879	5.01531	0.97224	0.240963	19.2591
LDB2		KEGG_PATHWAY	hsa05221:Acute myeloid leukemia	5	0.00977059	0.0189357	MAP2K1, PIK3CD, STAT5B, SOS2, TCF7L1	127	56	6879	4.83619	0.982627	0.251355	21.4865
FHL1		KEGG_PATHWAY	hsa04151:PI3K-Akt signaling pathway	13	0.0254035	0.0237425	FGFR2, FGF19, MAP2K1, PIK3CD, FGF12, KDR, SOS2, COL1A2, CREB3L1, GYS2, EFNA5, GNG4, FGF2	127	345	6879	2.04101	0.993867	0.287951	26.2176
RAB3C		KEGG_PATHWAY	hsa04152:AMPK signaling pathway	7	0.0136788	0.0250154	IRS2, PIK3CD, FBP1, GYS2, CREB3L1, SIRT1, CPT1A	127	123	6879	3.08258	0.995349	0.285141	27.4256
DCLK3		KEGG_PATHWAY	hsa05230:Central carbon metabolism in cancer	5	0.00977059	0.0293177	FGFR2, NTRK3, MAP2K1, ERBB2, PIK3CD	127	64	6879	4.23167	0.998179	0.310008	31.3753
HHIP		KEGG_PATHWAY	hsa04922:Glucagon signaling pathway	6	0.0117247	0.0347581	PYGL, GYS2, CREB3L1, SIRT1, CPT1A, CALM1	127	99	6879	3.28275	0.999447	0.340753	36.0863
F12		KEGG_PATHWAY	hsa04915:Estrogen signaling pathway	6	0.0117247	0.0347581	ADCY7, MAP2K1, PIK3CD, SOS2, CREB3L1, CALM1	127	99	6879	3.28275	0.999447	0.340753	36.0863
GFPT2		KEGG_PATHWAY	hsa05218:Melanoma	5	0.00977059	0.0407054	FGF19, MAP2K1, PIK3CD, FGF12, FGF2	127	71	6879	3.81446	0.999851	0.371041	40.8943
IL23A		KEGG_PATHWAY	hsa00071:Fatty acid degradation	4	0.00781647	0.0410315	ACADSB, ACSL4, ALDH3A2, CPT1A	127	42	6879	5.15861	0.999861	0.358604	41.148
CHODL		KEGG_PATHWAY	hsa04062:Chemokine signaling pathway	8	0.0156329	0.0540973	ADCY7, MAP2K1, HCK, PIK3CD, STAT5B, SOS2, GNG4, CXCL12	127	186	6879	2.32969	0.999992	0.42962	50.5264
CD109		KEGG_PATHWAY	hsa01212:Fatty acid metabolism	4	0.00781647	0.0571721	ACADSB, ELOVL5, ACSL4, CPT1A	127	48	6879	4.51378	0.999996	0.43295	52.5233
MAGI2		KEGG_PATHWAY	hsa04919:Thyroid hormone signaling pathway	6	0.0117247	0.05943	NOTCH1, NCOA1, MAP2K1, ATP1B2, PIK3CD, TBC1D4	127	115	6879	2.82602	0.999998	0.431494	53.942
NLGN4X		KEGG_PATHWAY	hsa00480:Glutathione metabolism	4	0.00781647	0.0662109	GSTT2B, GCLC, RRM2B, SMS	127	51	6879	4.24826	1	0.453994	57.9715
SALL3		KEGG_PATHWAY	hsa04666:Fc gamma R-mediated phagocytosis	5	0.00977059	0.0676407	WASF3, MAP2K1, HCK, PIK3CD, MARCKS	127	84	6879	3.22413	1	0.447838	58.7786
TOX3		KEGG_PATHWAY	hsa04722:Neurotrophin signaling pathway	6	0.0117247	0.0687664	NTRK3, MAP2K1, PIK3CD, SOS2, SH2B3, CALM1	127	120	6879	2.70827	1	0.440618	59.4039
LRIG1		KEGG_PATHWAY	hsa04970:Salivary secretion	5	0.00977059	0.0724406	CD38, ADCY7, ATP1B2, BST1, CALM1	127	86	6879	3.14915	1	0.445921	61.3848
ESRG		KEGG_PATHWAY	hsa04012:ErbB signaling pathway	5	0.00977059	0.0749045	MAP2K1, ERBB2, PIK3CD, STAT5B, SOS2	127	87	6879	3.11295	1	0.445395	62.6628
LOC101929194		KEGG_PATHWAY	hsa04540:Gap junction	5	0.00977059	0.0774105	TUBB2B, ADCY7, MAP2K1, SOS2, GJA1	127	88	6879	3.07758	1	0.445119	63.9226
GDF3		KEGG_PATHWAY	hsa04974:Protein digestion and absorption	5	0.00977059	0.0774105	COL9A1, COL14A1, ATP1B2, COL1A2, PGA5	127	88	6879	3.07758	1	0.445119	63.9226
GPR176		KEGG_PATHWAY	hsa05223:Non-small cell lung cancer	4	0.00781647	0.0826214	MAP2K1, ERBB2, PIK3CD, SOS2	127	56	6879	3.86895	1	0.45632	66.4178
CACHD1		KEGG_PATHWAY	hsa04912:GnRH signaling pathway	5	0.00977059	0.0851781	ADCY7, MAP2K1, SOS2, MAP2K6, CALM1	127	91	6879	2.97612	1	0.456009	67.583
SMARCA2		KEGG_PATHWAY	hsa04068:FoxO signaling pathway	6	0.0117247	0.0989582	IRS2, MAP2K1, PIK3CD, SOS2, BNIP3, SIRT1	127	134	6879	2.42531	1	0.498599	73.2474
CLU
RPP25		Category	Term	Count	%	PValue	Genes	List Total	Pop Hits	Pop Total	Fold Enrichment	Bonferroni	Benjamini	FDR
TDGF1		GOTERM_BP_DIRECT	GO:0018108~peptidyl-tyrosine phosphorylation	12	0.0234494	8.62104e-05	FGFR2, NTRK3, EPHA4, MAP2K1, HCK, ERBB2, STAT5B, PEAK1, ROR2, FGF2, MAP2K6, KDR	297	153	16792	4.43441	0.161857	0.161857	0.14853
BIK		GOTERM_BP_DIRECT	GO:0060253~negative regulation of glial cell proliferation	4	0.00781647	0.00018007	TSPO, NOTCH1, SOX11, PTN	297	7	16792	32.3078	0.308447	0.168403	0.310001
VASH2		GOTERM_BP_DIRECT	GO:0010628~positive regulation of gene expression	14	0.0273576	0.000796116	NTRK3, SERPINB9, PLP1, CAV1, ANK2, MAP2K1, PIAS3, SOX11, ERBB2, PIK3CD, GJA1, NFE2L2, DNMT3B, GAS6	297	262	16792	3.02115	0.804285	0.419403	1.36373
SYT2		GOTERM_BP_DIRECT	GO:0030514~negative regulation of BMP signaling pathway	6	0.0117247	0.0011287	WNT5A, GDF3, CAV1, NOTCH1, SPG20, TOB1	297	45	16792	7.5385	0.901024	0.439104	1.92824
EFNA5		GOTERM_BP_DIRECT	GO:0007507~heart development	11	0.0214953	0.00153874	FGF19, SRI, SENP2, NTRK3, NOTCH1, MAP2K1, ERBB2, TDGF1, GJA1, PTN, FGF12	297	183	16792	3.3985	0.957309	0.46781	2.62003
LDHD		GOTERM_BP_DIRECT	GO:0021510~spinal cord development	5	0.00977059	0.00180628	SOX11, PTN, DPYSL2, PTBP2, NEFL	297	30	16792	9.42312	0.975341	0.460493	3.06891
PMAIP1		GOTERM_BP_DIRECT	GO:0030324~lung development	7	0.0136788	0.00221816	FGFR2, WNT5A, NOTCH1, LIPA, PTN, FGF2, ZIC3	297	76	16792	5.20751	0.98941	0.477792	3.75617
DSC3		GOTERM_BP_DIRECT	GO:0014066~regulation of phosphatidylinositol 3-kinase signaling	7	0.0136788	0.00253105	FGF19, FGFR2, IRS2, ERBB2, PIK3CD, PIP4K2A, FGF2	297	78	16792	5.07399	0.994429	0.477312	4.2752
NKAIN4		GOTERM_BP_DIRECT	GO:0043065~positive regulation of apoptotic process	14	0.0273576	0.00266509	ARHGEF4, TSPO, CLU, BNIP3, PMAIP1, SIRT1, NTRK3, NOTCH1, NCOA1, SOS2, PTN, MAP2K6, TERF1, FGD4	297	300	16792	2.63847	0.995769	0.455161	4.49672
CDHR1		GOTERM_BP_DIRECT	GO:0007155~cell adhesion	18	0.0351741	0.00333427	MTSS1, ATP1B2, ADAM23, HCK, FERMT1, EDIL3, CXCL12, GAS6, THY1, CD9, EPHA4, SORBS1, FAT1, CD58, NLGN4X, DSC3, HAS3, LOXL2	297	459	16792	2.2172	0.99893	0.495405	5.59552
TF		GOTERM_BP_DIRECT	GO:0045766~positive regulation of angiogenesis	8	0.0156329	0.00427315	WNT5A, SASH1, NFE2L2, VASH2, FGF2, SIRT1, DDAH1, KDR	297	115	16792	3.93313	0.999845	0.54945	7.11708
PREX2		GOTERM_BP_DIRECT	GO:0032570~response to progesterone	5	0.00977059	0.00478921	CD38, TSPO, CAV1, NCOA1, PTN	297	39	16792	7.24855	0.999946	0.559269	7.94355
GNG4		GOTERM_BP_DIRECT	GO:0010976~positive regulation of neuron projection development	7	0.0136788	0.00487823	WNT5A, MAGI2, SERPINF1, STMN2, PTN, DPYSL3, NFE2L2	297	89	16792	4.44687	0.999955	0.537167	8.08542
SYT11		GOTERM_BP_DIRECT	GO:0035019~somatic stem cell population maintenance	6	0.0117247	0.00573734	TDGF1, SOX2, LDB2, FGF2, DPPA4, ZIC3	297	65	16792	5.21896	0.999992	0.569026	9.44396
TUNAR		GOTERM_BP_DIRECT	GO:0008595~anterior/posterior axis specification, embryo	3	0.00586235	0.0061338	WNT5A, TDGF1, FZD5	297	7	16792	24.2309	0.999997	0.56831	10.0645
CELF2		GOTERM_BP_DIRECT	GO:0046854~phosphatidylinositol phosphorylation	7	0.0136788	0.00635615	FGF19, FGFR2, IRS2, ERBB2, PIK3CD, PIP4K2A, FGF2	297	94	16792	4.21033	0.999998	0.557884	10.4108
FGF19		GOTERM_BP_DIRECT	GO:0000165~MAPK cascade	12	0.0234494	0.0069662	FGF19, FGFR2, PEA15, CAV1, IRS2, MAP2K1, ERBB2, FGF2, NEFL, PAQR3, MAP2K6, CALM1	297	262	16792	2.58956	0.999999	0.56922	11.3543
NBEA		GOTERM_BP_DIRECT	GO:0001934~positive regulation of protein phosphorylation	8	0.0156329	0.00729906	FGF19, SENP2, NTRK3, ERBB2, EFNA5, SIRT1, GAS6, KDR	297	127	16792	3.56149	1	0.565482	11.8653
CREB3L1		GOTERM_BP_DIRECT	GO:0001938~positive regulation of endothelial cell proliferation	6	0.0117247	0.00737582	WNT5A, CXCL12, VASH2, FGF2, SIRT1, KDR	297	69	16792	4.91641	1	0.549763	11.9827
LIN7A		GOTERM_BP_DIRECT	GO:1901844~regulation of cell communication by electrical coupling involved in cardiac conduction	3	0.00586235	0.00808362	SRI, CAV1, CALM1	297	8	16792	21.202	1	0.564441	13.0585
DDAH1		GOTERM_BP_DIRECT	GO:0051924~regulation of calcium ion transport	4	0.00781647	0.00834284	SRI, CACNA2D1, ANK2, GJA1	297	24	16792	9.42312	1	0.558262	13.4494
SERPINB9		GOTERM_BP_DIRECT	GO:0010595~positive regulation of endothelial cell migration	5	0.00977059	0.00863259	WNT5A, SASH1, TDGF1, FGF2, KDR	297	46	16792	6.14551	1	0.553852	13.8844
WNT5A		GOTERM_BP_DIRECT	GO:0045893~positive regulation of transcription, DNA-templated	18	0.0351741	0.0100904	WNT5A, ELF3, MAP2K1, SOX11, GLIS2, SOX2, TOX3, FZD7, ZIC3, ZIC2, CD38, NOTCH1, NCOA1, ROR2, HAS3, MAD2L2, FGF2, SMARCA2	297	515	16792	1.97611	1	0.594667	16.0417
ZIC2		GOTERM_BP_DIRECT	GO:0036092~phosphatidylinositol-3-phosphate biosynthetic process	5	0.00977059	0.0107583	FGF19, FGFR2, IRS2, PIK3CD, FGF2	297	49	16792	5.76926	1	0.602682	17.0131
GRID2		GOTERM_BP_DIRECT	GO:0048015~phosphatidylinositol-mediated signaling	7	0.0136788	0.0111924	FGF19, FGFR2, IRS2, ERBB2, PIK3CD, GPR143, FGF2	297	106	16792	3.73369	1	0.602297	17.6386
LOC105371622		GOTERM_BP_DIRECT	GO:0046777~protein autophosphorylation	9	0.0175871	0.0113885	FGFR2, NTRK3, EPHA4, HCK, ERBB2, PEAK1, WNK2, KDR, THY1	297	172	16792	2.95842	1	0.594329	17.9199
GYLTL1B		GOTERM_BP_DIRECT	GO:0032869~cellular response to insulin stimulus	6	0.0117247	0.01158	IRS2, GCLC, SORBS1, C2CD5, DENND4C, TBC1D4	297	77	16792	4.40561	1	0.586663	18.1936
LINC00678		GOTERM_BP_DIRECT	GO:0000187~activation of MAPK activity	7	0.0136788	0.0116872	WNT5A, NTRK3, PEA15, MAP2K1, TDGF1, FGF2, MAP2K6	297	107	16792	3.69879	1	0.576782	18.3463
MIAT		GOTERM_BP_DIRECT	GO:0071333~cellular response to glucose stimulus	5	0.00977059	0.0131955	IRS2, GCLC, SERPINF1, PDK3, GAS6	297	52	16792	5.43642	1	0.608622	20.4684
IQCH		GOTERM_BP_DIRECT	GO:0007165~signal transduction	32	0.0625318	0.0138234	SRI, TNFRSF21, TSPO, GABRB3, LITAF, CLDN3, RHPN2, ERBB2, GJA1, IQGAP2, FGF12, GPR143, CXCL12, ARHGAP21, ANK2, SH2B3, FGF2, MAP2K6, KIF13B, IRS2, CAPN5, MAGI2, MAP2K1, TP53BP2, PIK3CD, DPYSL2, GAS6, SALL3, CD38, SALL2, ROR2, MAPRE2	297	1161	16792	1.55835	1	0.613361	21.3364
CXCL12		GOTERM_BP_DIRECT	GO:0061045~negative regulation of wound healing	3	0.00586235	0.0153344	CD109, GJA1, FGF2	297	11	16792	15.4197	1	0.639732	23.3887
SH2B3		GOTERM_BP_DIRECT	GO:0071372~cellular response to follicle-stimulating hormone stimulus	3	0.00586235	0.0153344	NOTCH1, GCLC, EFNA5	297	11	16792	15.4197	1	0.639732	23.3887
CD38		GOTERM_BP_DIRECT	GO:0046326~positive regulation of glucose import	4	0.00781647	0.0154883	FGF19, IRS2, SORBS1, NFE2L2	297	30	16792	7.5385	1	0.631754	23.5948
TRIM14		GOTERM_BP_DIRECT	GO:0030032~lamellipodium assembly	4	0.00781647	0.0169286	ARHGEF4, WASF3, SPATA13, FGD4	297	31	16792	7.29532	1	0.653402	25.4992
TCF7L1		GOTERM_BP_DIRECT	GO:0050680~negative regulation of epithelial cell proliferation	5	0.00977059	0.0169542	FGFR2, WNT5A, MTSS1, SOX2, PTN	297	56	16792	5.0481	1	0.642992	25.5327
KDR		GOTERM_BP_DIRECT	GO:0046685~response to arsenic-containing substance	3	0.00586235	0.0212491	GCLC, FECH, SERPINF1	297	13	16792	13.0474	1	0.71543	30.9473
IQGAP2		GOTERM_BP_DIRECT	GO:0043433~negative regulation of sequence-specific DNA binding transcription factor activity	5	0.00977059	0.0213204	GLIS2, MAD2L2, SIRT1, GAS6, TRIB1	297	60	16792	4.71156	1	0.706539	31.034
GLCCI1		GOTERM_BP_DIRECT	GO:0001837~epithelial to mesenchymal transition	4	0.00781647	0.0216848	FGFR2, WNT5A, NOTCH1, LOXL2	297	34	16792	6.65161	1	0.702841	31.4753
PXYLP1		GOTERM_BP_DIRECT	GO:0043547~positive regulation of GTPase activity	18	0.0351741	0.023032	ARHGEF4, FGFR2, FGF19, IRS2, ERBB2, PREX2, THY1, ARHGAP21, CHML, SOS2, ACAP2, DENND4C, RAP1GAP2, FGF2, NEFL, SPATA13, CALM1, FGD4	297	565	16792	1.80123	1	0.715159	33.0842
BCAT1		GOTERM_BP_DIRECT	GO:2000678~negative regulation of transcription regulatory region DNA binding	3	0.00586235	0.0245059	SRI, SOX11, MAD2L2	297	14	16792	12.1154	1	0.728258	34.8035
HAS3		GOTERM_BP_DIRECT	GO:0030182~neuron differentiation	6	0.0117247	0.0263706	WNT5A, MAP2K1, SOX11, NLGN4X, FZD5, FZD7	297	95	16792	3.57087	1	0.745459	36.9191
MMP25		GOTERM_BP_DIRECT	GO:0021549~cerebellum development	4	0.00781647	0.027096	NCOA1, NLGN4X, PTN, PTBP2	297	37	16792	6.11229	1	0.746439	37.7245
MANSC1		GOTERM_BP_DIRECT	GO:0071456~cellular response to hypoxia	6	0.0117247	0.0274332	FMN2, BNIP3, PTN, NFE2L2, PMAIP1, SIRT1	297	96	16792	3.53367	1	0.742411	38.0957
DMRTA1		GOTERM_BP_DIRECT	GO:0007169~transmembrane receptor protein tyrosine kinase signaling pathway	6	0.0117247	0.0274332	NTRK3, MTSS1, HCK, ERBB2, ROR2, KDR	297	96	16792	3.53367	1	0.742411	38.0957
BNIP3		GOTERM_BP_DIRECT	GO:0050905~neuromuscular process	3	0.00586235	0.0279517	AGTPBP1, SPG20, FGF12	297	15	16792	11.3077	1	0.740822	38.6621
EPHA4		GOTERM_BP_DIRECT	GO:0002042~cell migration involved in sprouting angiogenesis	3	0.00586235	0.0279517	TDGF1, FGF2, KDR	297	15	16792	11.3077	1	0.740822	38.6621
PTN		GOTERM_BP_DIRECT	GO:0050796~regulation of insulin secretion	5	0.00977059	0.0304867	KCNS3, ICA1, SLC16A1, MARCKS, CPT1A	297	67	16792	4.21931	1	0.763333	41.3625
LINC00461		GOTERM_BP_DIRECT	GO:0007223~Wnt signaling pathway, calcium modulating pathway	4	0.00781647	0.0310663	WNT5A, ROR2, FZD5, CALM1	297	39	16792	5.79884	1	0.762192	41.9639
NTRK3		GOTERM_BP_DIRECT	GO:0010934~macrophage cytokine production	2	0.00390823	0.0349452	SIRT1, GAS6	297	2	16792	56.5387	1	0.794776	45.8419
FZD7		GOTERM_BP_DIRECT	GO:0071300~cellular response to retinoic acid	5	0.00977059	0.0350252	WNT5A, NTRK3, BRINP1, SERPINF1, FZD7	297	70	16792	4.03848	1	0.788509	45.9192
SLC16A9		GOTERM_BP_DIRECT	GO:0033138~positive regulation of peptidyl-serine phosphorylation	5	0.00977059	0.0350252	WNT5A, NTRK3, CAV1, MAD2L2, GAS6	297	70	16792	4.03848	1	0.788509	45.9192
SLC23A2		GOTERM_BP_DIRECT	GO:0032024~positive regulation of insulin secretion	4	0.00781647	0.0353246	CD38, IRS2, GLUD1, GJA1	297	41	16792	5.51597	1	0.784425	46.2078
CP		GOTERM_BP_DIRECT	GO:0031397~negative regulation of protein ubiquitination	4	0.00781647	0.0353246	SENP2, TSPO, CAV1, GCLC	297	41	16792	5.51597	1	0.784425	46.2078
DAB1		GOTERM_BP_DIRECT	GO:0046847~filopodium assembly	3	0.00586235	0.0353801	ARHGEF4, SPATA13, FGD4	297	17	16792	9.97742	1	0.778102	46.2612
GJA1		GOTERM_BP_DIRECT	GO:0060307~regulation of ventricular cardiac muscle cell membrane repolarization	3	0.00586235	0.0353801	CACNA2D1, ANK2, GJA1	297	17	16792	9.97742	1	0.778102	46.2612
GAS6		GOTERM_BP_DIRECT	GO:0051412~response to corticosterone	3	0.00586235	0.0393482	NTRK3, NEFL, CALM1	297	18	16792	9.42312	1	0.806846	49.9477
PYGL		GOTERM_BP_DIRECT	GO:0030705~cytoskeleton-dependent intracellular transport	3	0.00586235	0.0393482	KIF13A, KIF5C, KIF13B	297	18	16792	9.42312	1	0.806846	49.9477
PLCL2		GOTERM_BP_DIRECT	GO:0010977~negative regulation of neuron projection development	4	0.00781647	0.0422447	STMN2, DPYSL3, RAP1GAP2, PAQR3	297	44	16792	5.13988	1	0.823298	52.4869
MOB3B		GOTERM_BP_DIRECT	GO:0045879~negative regulation of smoothened signaling pathway	3	0.00586235	0.043476	SALL3, GLIS2, HHIP	297	19	16792	8.92717	1	0.826334	53.5291
NMI		GOTERM_BP_DIRECT	GO:0010975~regulation of neuron projection development	3	0.00586235	0.043476	GRID2, CHODL, DPYSL3	297	19	16792	8.92717	1	0.826334	53.5291
RBM47		GOTERM_BP_DIRECT	GO:0008045~motor neuron axon guidance	3	0.00586235	0.043476	EPHA4, ERBB2, KIF5C	297	19	16792	8.92717	1	0.826334	53.5291
C19orf66		GOTERM_BP_DIRECT	GO:0006979~response to oxidative stress	6	0.0117247	0.0452006	GCLC, SLC23A2, PSIP1, NEIL1, RRM2B, SIRT1	297	110	16792	3.08393	1	0.832593	54.9527
ATP1B2		GOTERM_BP_DIRECT	GO:0045666~positive regulation of neuron differentiation	5	0.00977059	0.0489432	BRINP1, NCOA1, DAB1, SOX11, DNMT3B	297	78	16792	3.62428	1	0.850906	57.902
NYNRIN		GOTERM_BP_DIRECT	GO:0051788~response to misfolded protein	2	0.00390823	0.0519587	F12, CLU	297	3	16792	37.6925	1	0.86287	60.145
TRIB1		GOTERM_BP_DIRECT	GO:0045837~negative regulation of membrane potential	2	0.00390823	0.0519587	BNIP3, PTN	297	3	16792	37.6925	1	0.86287	60.145
COL9A1		GOTERM_BP_DIRECT	GO:0070672~response to interleukin-15	2	0.00390823	0.0519587	STAT5B, ACSL4	297	3	16792	37.6925	1	0.86287	60.145
HCK		GOTERM_BP_DIRECT	GO:0071279~cellular response to cobalt ion	2	0.00390823	0.0519587	SERPINF1, BNIP3	297	3	16792	37.6925	1	0.86287	60.145
MUC4		GOTERM_BP_DIRECT	GO:1904667~negative regulation of ubiquitin protein ligase activity	2	0.00390823	0.0519587	MAD2L2, USP44	297	3	16792	37.6925	1	0.86287	60.145
ICA1		GOTERM_BP_DIRECT	GO:0098903~regulation of membrane repolarization during action potential	2	0.00390823	0.0519587	CACNA2D1, CAV1	297	3	16792	37.6925	1	0.86287	60.145
CAV1		GOTERM_BP_DIRECT	GO:0050769~positive regulation of neurogenesis	3	0.00586235	0.0521838	BHLHB9, SERPINF1, SOX11	297	21	16792	8.07696	1	0.859146	60.3078
PEA15		GOTERM_BP_DIRECT	GO:0030879~mammary gland development	3	0.00586235	0.0521838	CAV1, IRS2, TDGF1	297	21	16792	8.07696	1	0.859146	60.3078
NRN1L		GOTERM_BP_DIRECT	GO:0035023~regulation of Rho protein signal transduction	5	0.00977059	0.0548425	ARHGEF4, PREX2, SOS2, SPATA13, FGD4	297	81	16792	3.49004	1	0.868214	62.1843
TSPAN3		GOTERM_BP_DIRECT	GO:0021762~substantia nigra development	4	0.00781647	0.0551615	PLP1, GLUD1, FGF2, CALM1	297	49	16792	4.61541	1	0.865145	62.4038
PEAK1		GOTERM_BP_DIRECT	GO:0060045~positive regulation of cardiac muscle cell proliferation	3	0.00586235	0.0567507	FGFR2, NOTCH1, FGF2	297	22	16792	7.70983	1	0.868406	63.4793
DYSF		GOTERM_BP_DIRECT	GO:0008543~fibroblast growth factor receptor signaling pathway	5	0.00977059	0.0568906	FGF19, FGFR2, SPRED2, FGF12, FGF2	297	82	16792	3.44748	1	0.864569	63.5725
ZNF507		GOTERM_BP_DIRECT	GO:0060070~canonical Wnt signaling pathway	5	0.00977059	0.0589794	WNT5A, DIXDC1, FZD5, FZD7, TCF7L1	297	83	16792	3.40595	1	0.870096	64.9387
DPPA4		GOTERM_BP_DIRECT	GO:0006629~lipid metabolic process	7	0.0136788	0.0597408	PLCL2, SLC16A1, LIPA, CLU, OSBPL10, ACSL4, FABP5	297	157	16792	2.52083	1	0.86929	65.4246
NEFL		GOTERM_BP_DIRECT	GO:0014003~oligodendrocyte development	3	0.00586235	0.0614513	CD9, WASF3, SOX11	297	23	16792	7.37462	1	0.872759	66.4932
SASH1		GOTERM_BP_DIRECT	GO:0016239~positive regulation of macroautophagy	3	0.00586235	0.0614513	BNIP3, SIRT1, KDR	297	23	16792	7.37462	1	0.872759	66.4932
ANK2		GOTERM_BP_DIRECT	GO:0030308~negative regulation of cell growth	6	0.0117247	0.0630555	FHL1, FBP1, GJA1, GNG4, SMARCA2, SIRT1	297	121	16792	2.80357	1	0.875593	67.467
GPR50		GOTERM_BP_DIRECT	GO:0050900~leukocyte migration	6	0.0117247	0.0648502	SLC16A1, CAV1, ATP1B2, CD58, COL1A2, GAS6	297	122	16792	2.78059	1	0.87907	68.5248
IRS2		GOTERM_BP_DIRECT	GO:0007010~cytoskeleton organization	7	0.0136788	0.0658166	WASF3, TUBB2B, ANK2, PPL, DPYSL2, FGD4, THY1	297	161	16792	2.45821	1	0.879079	69.081
TMEM194B		GOTERM_BP_DIRECT	GO:0006091~generation of precursor metabolites and energy	4	0.00781647	0.0666883	GBE1, FECH, GYS2, AASS	297	53	16792	4.26707	1	0.878716	69.5746
PHYH		GOTERM_BP_DIRECT	GO:0007399~nervous system development	10	0.0195412	0.0685735	FGF19, GLIS2, ADGRV1, PTN, EFNA5, DPYSL2, FGF12, SMARCA2, FGF2, ITM2A	297	287	16792	1.96999	1	0.882286	70.617
DIXDC1		GOTERM_BP_DIRECT	GO:0003402~planar cell polarity pathway involved in axis elongation	2	0.00390823	0.0686732	WNT5A, MAGI2	297	4	16792	28.2694	1	0.878964	70.6712
GYS2		GOTERM_BP_DIRECT	GO:0021891~olfactory bulb interneuron development	2	0.00390823	0.0686732	SALL3, WNT5A	297	4	16792	28.2694	1	0.878964	70.6712
EDIL3		GOTERM_BP_DIRECT	GO:0003104~positive regulation of glomerular filtration	2	0.00390823	0.0686732	GJA1, GAS6	297	4	16792	28.2694	1	0.878964	70.6712
AUTS2		GOTERM_BP_DIRECT	GO:0010453~regulation of cell fate commitment	2	0.00390823	0.0686732	FGFR2, GDF3	297	4	16792	28.2694	1	0.878964	70.6712
PVRL1		GOTERM_BP_DIRECT	GO:0006366~transcription from RNA polymerase II promoter	15	0.0293118	0.0700487	BACH1, NMI, ELF3, SOX11, GLIS2, STAT5B, SOX2, HLTF, MSC, ZIC3, SALL3, SALL2, CREB3L1, ETV1, NFE2L2	297	513	16792	1.65318	1	0.880536	71.4091
ITM2A		GOTERM_BP_DIRECT	GO:0008284~positive regulation of cell proliferation	14	0.0273576	0.0704393	FGFR2, FGF19, IRS2, SOX11, HCK, SIRT1, KDR, NTRK3, NOTCH1, TDGF1, PTN, KDM4C, CDCA7L, FGF2	297	466	16792	1.69859	1	0.87839	71.6154
TNFRSF21		GOTERM_BP_DIRECT	GO:0007568~aging	7	0.0136788	0.0722413	TSPO, GCLC, LITAF, SERPINF1, NFE2L2, LOXL2, FGF2	297	165	16792	2.39861	1	0.881503	72.5493
SERPINF1		GOTERM_BP_DIRECT	GO:0051607~defense response to virus	7	0.0136788	0.0722413	POLR3G, SERINC5, IL23A, C19ORF66, SAMHD1, BNIP3, PMAIP1	297	165	16792	2.39861	1	0.881503	72.5493
FGF12		GOTERM_BP_DIRECT	GO:0007517~muscle organ development	5	0.00977059	0.0723545	SRI, FHL1, CHODL, ETV1, SIRT1	297	89	16792	3.17633	1	0.878407	72.607
SHISA3		GOTERM_BP_DIRECT	GO:0060548~negative regulation of cell death	4	0.00781647	0.0728308	NTRK3, SOX11, BNIP3, FGF2	297	55	16792	4.11191	1	0.87666	72.8485
PRKCQ-AS1		GOTERM_BP_DIRECT	GO:0042733~embryonic digit morphogenesis	4	0.00781647	0.0759937	WNT5A, ROR2, GJA1, FLVCR1	297	56	16792	4.03848	1	0.884469	74.4019
PLP1		GOTERM_BP_DIRECT	GO:0002053~positive regulation of mesenchymal cell proliferation	3	0.00586235	0.0762944	FGFR2, WNT5A, IRS2	297	26	16792	6.5237	1	0.88218	74.5451
CD200		GOTERM_BP_DIRECT	GO:0050999~regulation of nitric-oxide synthase activity	3	0.00586235	0.0762944	CAV1, DDAH1, CALM1	297	26	16792	6.5237	1	0.88218	74.5451
SALL2		GOTERM_BP_DIRECT	GO:0032148~activation of protein kinase B activity	3	0.00586235	0.0762944	WNT5A, NTRK3, GAS6	297	26	16792	6.5237	1	0.88218	74.5451
KIZ		GOTERM_BP_DIRECT	GO:0032355~response to estradiol	5	0.00977059	0.0771283	CD38, NCOA1, STAT5B, PTN, DNMT3B	297	91	16792	3.10652	1	0.881737	74.9385
CDCA7L		GOTERM_BP_DIRECT	GO:0033077~T cell differentiation in thymus	3	0.00586235	0.0814701	STAT5B, FZD5, FZD7	297	27	16792	6.28208	1	0.89261	76.8954
LIPA		GOTERM_BP_DIRECT	GO:0014065~phosphatidylinositol 3-kinase signaling	3	0.00586235	0.0814701	ERBB2, PIK3CD, PREX2	297	27	16792	6.28208	1	0.89261	76.8954
MTM1		GOTERM_BP_DIRECT	GO:0048678~response to axon injury	3	0.00586235	0.0814701	NTRK3, DPYSL3, FGF2	297	27	16792	6.28208	1	0.89261	76.8954
SCG5		GOTERM_BP_DIRECT	GO:0006661~phosphatidylinositol biosynthetic process	4	0.00781647	0.0824975	MTM1, PIK3CD, PIP4K2A, FGF2	297	58	16792	3.89922	1	0.892693	77.3369
HIST1H2BD		GOTERM_BP_DIRECT	GO:0001666~response to hypoxia	7	0.0136788	0.0843068	CD38, CAV1, CLDN3, BNIP3, LOXL2, DNMT3B, CXCL12	297	172	16792	2.30099	1	0.895094	78.0952
SORBS1		GOTERM_BP_DIRECT	GO:1903361~protein localization to basolateral plasma membrane	2	0.00390823	0.085094	CAV1, LIN7A	297	5	16792	22.6155	1	0.894453	78.4177
BRINP1		GOTERM_BP_DIRECT	GO:0072201~negative regulation of mesenchymal cell proliferation	2	0.00390823	0.085094	WNT5A, PTN	297	5	16792	22.6155	1	0.894453	78.4177
IQCK		GOTERM_BP_DIRECT	GO:0038031~non-canonical Wnt signaling pathway via JNK cascade	2	0.00390823	0.085094	WNT5A, FZD7	297	5	16792	22.6155	1	0.894453	78.4177
FAM65A		GOTERM_BP_DIRECT	GO:0014012~peripheral nervous system axon regeneration	2	0.00390823	0.085094	TSPO, NEFL	297	5	16792	22.6155	1	0.894453	78.4177
TMEM2		GOTERM_BP_DIRECT	GO:0030035~microspike assembly	2	0.00390823	0.085094	MTSS1, FGD4	297	5	16792	22.6155	1	0.894453	78.4177
POLR3G		GOTERM_BP_DIRECT	GO:0006906~vesicle fusion	4	0.00781647	0.0858364	DYSF, C2CD5, SYT2, SYT11	297	59	16792	3.83313	1	0.893696	78.7176
ANKRD33B		GOTERM_BP_DIRECT	GO:0090200~positive regulation of release of cytochrome c from mitochondria	3	0.00586235	0.0867506	BNIP3, BIK, PMAIP1	297	28	16792	6.05772	1	0.89345	79.0816
ELF3		GOTERM_BP_DIRECT	GO:2000352~negative regulation of endothelial cell apoptotic process	3	0.00586235	0.0867506	NFE2L2, GAS6, KDR	297	28	16792	6.05772	1	0.89345	79.0816
PSIP1		GOTERM_BP_DIRECT	GO:0030336~negative regulation of cell migration	5	0.00977059	0.0871357	MAGI2, ABHD6, PTN, DPYSL3, THY1	297	95	16792	2.97572	1	0.891691	79.2332
CHML		GOTERM_BP_DIRECT	GO:0042493~response to drug	10	0.0195412	0.0893608	CD38, TSPO, DAB1, FECH, PTN, DPYSL2, DNMT3B, MAP2K6, CPT1A, TERF1	297	304	16792	1.85983	1	0.89517	80.0888
PIP4K2A		GOTERM_BP_DIRECT	GO:0071549~cellular response to dexamethasone stimulus	3	0.00586235	0.0921306	FECH, SERPINF1, DNMT3B	297	29	16792	5.84883	1	0.899915	81.1075
SPATA13		GOTERM_BP_DIRECT	GO:0001947~heart looping	4	0.00781647	0.0926832	WNT5A, NOTCH1, GJA1, ZIC3	297	61	16792	3.70746	1	0.898694	81.3048
PQLC3		GOTERM_BP_DIRECT	GO:0010629~negative regulation of gene expression	6	0.0117247	0.0951345	FGF19, SERPINF1, MAP2K1, SOX11, GJA1, SIRT1	297	137	16792	2.47615	1	0.902368	82.1568
SLC45A4		GOTERM_BP_DIRECT	GO:0001654~eye development	3	0.00586235	0.0976051	GDF3, SALL2, SOX2	297	30	16792	5.65387	1	0.905893	82.9784
NEIL1		GOTERM_BP_DIRECT	GO:0045944~positive regulation of transcription from RNA polymerase II promoter	24	0.0468988	0.0997516	BACH1, WNT5A, FGFR2, ELF3, SOX11, GLIS2, STAT5B, SOX2, LDB2, FZD5, HLTF, SIRT1, ZIC3, SENP2, NOTCH1, NCOA1, IL23A, PSIP1, ETV1, CREB3L1, AUTS2, NFE2L2, FGF2, SMARCA2	297	981	16792	1.38321	1	0.908485	83.6631
TSPO
KIF1A
THY1
TBC1D4
ETV1
CACNA2D1
COL1A2
SPG20
NOTCH1
TMEM108
ZNF107
FAT1
ADD2
ZNF138
OSBPL10
ADGRL2
DPYSL3
GPR143
GSTT2B
COL14A1
GLIS2
BTBD3
FMN2
LOXL2
FERMT1
LITAF
CPT1A
LHFP
C21orf91
COBL
FGF2
SEPHS1
ADAM23
BST1
ACADSB
SAMHD1
ACSL4
COTL1
ACSS3
ADGRV1
FAM124A
KREMEN1
SOS2
UBE2L6
MARCKS
FGD4
SERTAD4
BHLHB9
TOB1
WNK2
XPR1
LOC105373849
DENND4C
FZD5
ABHD6
TBC1D16
PIK3CD
STK38L
PPL
LOC105377538
MSC
SIRT1
CLDN3
MAP2K6
HLTF
GPR160
C2CD5
USO1
ADCY7
SMS
ROR2
PDK3
DNMT3B
CALM1
PHLDA1
CAPN5
KCNS3
FGFR2
CRISPLD1
FABP5
C2orf69
AASS
RELL1
RAB11FIP4
FAM161A
ARHGEF4
PIAS3
STAT5B
RCBTB1
RHPN2
SLC35F2
MBOAT1
GABRB3
LANCL2
IGF2BP3
MTSS1
GLUD1
SOX11
FECH
KIF13B
QSOX2
TCN2
BMI1
CD9
PAQR3
MAD2L2
NIN
WASF3
MAP2K1
BACH1
COMMD1
JMJD1C
KIF13A
KIAA1522
SACS
C21orf59
KLHL23
OSBPL1A
SLC41A1
IPW
TUBB2B
FLVCR1
CNTLN
ZNF680
DDX25
SCAMP5
DPYSL2
C14orf132
SMCHD1
SPRED2
KDM4C
RAP1GAP2
CD58
ERBB2
RRM2B
SERINC5
PCMTD2
ARHGAP21
MAPRE2
ACAP2
SMIM14
SLC16A1
DBNDD2
VAMP4
AEBP2
KIF5C
TERF1
LARP7
GBE1
LRRC58
CHSY1
ABHD17B
KLHL9
MTMR12
TJP2
AMN1
KIAA1958
RBP1
PTBP2
TP53BP2
ALDH3A2
SENP2
MYL6B
GCLC
AGTPBP1
ZNF101
SPECC1
ZNF195
WDFY1
ZSCAN30
NCOA1
NFE2L2
ELOVL5
RAB6B
CAPZA2
GTDC1
SRI
RAB33B

## Sheet: 9. G3SAd4 B>D
TMPRSS11E		Category	Term	Count	%	PValue	Genes	List Total	Pop Hits	Pop Total	Fold Enrichment	Bonferroni	Benjamini	FDR
POSTN		KEGG_PATHWAY	hsa01100:Metabolic pathways	9	0.0934676	0.0381387	ALPL, MSMO1, PEMT, FUT1, ITPKB, GK, ACADL, ENO1, DHCR24	24	1219	6879	2.11618	0.941493	0.941493	33.3609
HOXD1		KEGG_PATHWAY	hsa00100:Steroid biosynthesis	2	0.0207706	0.064875	MSMO1, DHCR24	24	20	6879	28.6625	0.992527	0.913554	50.3477
RUNX3
BARX1		Category	Term	Count	%	PValue	Genes	List Total	Pop Hits	Pop Total	Fold Enrichment	Bonferroni	Benjamini	FDR
GATA2		GOTERM_BP_DIRECT	GO:0009888~tissue development	3	0.0311559	0.00123742	GATA2, BARX1, DHCR24	60	15	16792	55.9733	0.492006	0.492006	1.78935
LOC105373323		GOTERM_BP_DIRECT	GO:0006695~cholesterol biosynthetic process	3	0.0311559	0.00786649	MSMO1, INSIG1, DHCR24	60	38	16792	22.0947	0.9867	0.884674	10.8781
TAC3		GOTERM_BP_DIRECT	GO:0030097~hemopoiesis	3	0.0311559	0.0182659	GATA2, PDGFB, RUNX3	60	59	16792	14.2305	0.999958	0.965309	23.572
RNASE1		GOTERM_BP_DIRECT	GO:0009611~response to wounding	3	0.0311559	0.020664	PDGFB, ID3, GAP43	60	63	16792	13.327	0.999989	0.942468	26.2496
PCSK1N		GOTERM_BP_DIRECT	GO:0030855~epithelial cell differentiation	3	0.0311559	0.0251564	GSTA2, BARX1, ID3	60	70	16792	11.9943	0.999999	0.938414	31.0322
FBLN5		GOTERM_BP_DIRECT	GO:0045059~positive thymic T cell selection	2	0.0207706	0.0277711	CD3D, ITPKB	60	8	16792	69.9667	1	0.923282	33.681
EVX1		GOTERM_BP_DIRECT	GO:0030198~extracellular matrix organization	4	0.0415412	0.0315864	PDGFB, FBLN5, POSTN, VWA1	60	196	16792	5.71156	1	0.918575	37.3766
GPX2		GOTERM_BP_DIRECT	GO:0001558~regulation of cell growth	3	0.0311559	0.0321925	SGK1, CD320, FBLN5	60	80	16792	10.495	1	0.893261	37.9457
CCDC74B		GOTERM_BP_DIRECT	GO:0045717~negative regulation of fatty acid biosynthetic process	2	0.0207706	0.0413709	INSIG1, ACADL	60	12	16792	46.6444	1	0.923305	45.9961
RARRES2		GOTERM_BP_DIRECT	GO:0050921~positive regulation of chemotaxis	2	0.0207706	0.0413709	RARRES2, PDGFB	60	12	16792	46.6444	1	0.923305	45.9961
GREM2		GOTERM_BP_DIRECT	GO:0002576~platelet degranulation	3	0.0311559	0.0508557	RARRES2, PDGFB, TIMP1	60	103	16792	8.15146	1	0.942446	53.2853
FUT1		GOTERM_BP_DIRECT	GO:0046579~positive regulation of Ras protein signal transduction	2	0.0207706	0.064722	RASGEF1A, ITPKB	60	19	16792	29.4596	1	0.964111	62.3079
GSTA2		GOTERM_BP_DIRECT	GO:0014911~positive regulation of smooth muscle cell migration	2	0.0207706	0.0680119	PDGFB, POSTN	60	20	16792	27.9867	1	0.959671	64.1957
TMEM65		GOTERM_BP_DIRECT	GO:0001892~embryonic placenta development	2	0.0207706	0.0680119	GATA2, PDGFB	60	20	16792	27.9867	1	0.959671	64.1957
ACADL		GOTERM_BP_DIRECT	GO:0006468~protein phosphorylation	5	0.0519265	0.0761002	MAP3K6, SGK1, PDGFB, FAM20C, RUNX3	60	456	16792	3.06871	1	0.964223	68.4693
FOLR1		GOTERM_BP_DIRECT	GO:0061098~positive regulation of protein tyrosine kinase activity	2	0.0207706	0.0875137	UNC119, PDGFB	60	26	16792	21.5282	1	0.972075	73.6966
SPRY4		GOTERM_BP_DIRECT	GO:0050766~positive regulation of phagocytosis	2	0.0207706	0.0971136	GATA2, PYCARD	60	29	16792	19.3011	1	0.975896	77.456
KLHDC8A
ID3
ADAMTS8
THBS2
MFSD4
KLRG2
LOC101927853
BAHCC1
SCARB1
SBF2-AS1
GK
PYCARD
FAM155B
LAD1
CCDC74A
INSIG1
SGK1
GAP43
PPAPDC1A
CENPV
PDGFB
FAM69B
TIMP1
CD3D
CD320
VWA1
DHCR24
ENO1
CHD1L
SLC7A3
LOC729737
SGCG
UNC119
CPXM2
FAM20C
KCNC4
TMEM123
RCAN3
OLFML3
MAP3K6
PEMT
MSMO1
RAD51
SEMA4A
TBC1D5
ITPKB
ALPL
RASGEF1A

[truncated: 4 more sheets: 10. G3SAd4 D>B, 11. G3SAd6 B>D, 12. G3SAd6 D>B, Sheet1]
