# Supplementary material for: GATA transcription factors, SOX17 and TFAP2C, drive the human germ-cell specification program
Source: Life Sci Alliance. 2021 Feb 19;4(5):e202000974. doi: 10.26508/lsa.202000974 (PMC7918644; doi:10.26508/lsa.202000974)
Supplement: Supplementary file 4 [file LSA-2020-00974_TableS3.xlsx]

## Sheet: Sheet1
Discription	Comments	Sequence
M13 RV	For sequencing pGEMT vectors	CAGGAAACAGCTATGAC
M13 FW (-20)	For sequencing pGEMT vectors	GTAAAACGACGGCCAG
M13 M4	For sequencing pGEMT vectors	GTTTTCCCAGTCACGAC
pENTR1a sequence	For sequencing pENTR1a insert	GTAACATCAGAGATTTTGAGACAC
BamHI_3xFLAG	For PCR cloning FLAG-G4S	AATGAggatccATGGACTACAAGGACCACGAC
G4S_SpeI		TAAATactagtTGATCCGCCGCCACCCGA
Add V5-G4S F1	For cloning V5-G4S	GATCCATGGGCAAGCCCATCCCTAACCCTCTGCTGGGCCTGGACAGCACCTCT
Add V5-G4S F2		GGTGGCGGTGGCTCGGGCGGAGGTGGGTCGGGTGGCGGCGGATCAA
Add V5-G4S R1		CTAGTTGATCCGCCGCCACCCGACCCACCTCCGCCCGAGCCACCGCCACCAGAG
Add V5-G4S R2		GTGCTGTCCAGGCCCAGCAGAGGGTTAGGGATGGGCTTGCCCATG
Add 2TY1-G4S F1	For cloning 2xTY1-G4S	GATCCATGGAAGTGCACACCAACCAGGACCCACTGGATGCCGAGGTCCATACAAATCAGGACCCCCTCG
Add 2TY1-G4S F2		ACTCTGGTGGCGGTGGCTCGGGCGGAGGTGGGTCGGGTGGCGGCGGATCAA
Add 2TY1-G4S R1		CTAGTTGATCCGCCGCCACCCGACCCACCTCCGCCCGAGCCACCGCCACCAGAGTCGAG
Add 2TY1-G4S R2		GGGGTCCTGATTTGTATGGACCTCGGCATCCAGTGGGTCCTGGTTGGTGTGCACTTCCATG
SOX17_pENT_SpeI	For cloning GATA2 into pENTR1a	AAGAAactagtAGCAGCCCGGATGCGGGATAC
SOX17_pENT_XhoI		ATCTActcgagTCACACGTCAGGATAGTTGCAGT
TFAP2C_pENT_SpeI	For cloning MSX2 into pENTR1a	AGAGAactagtTTGTGGAAAATAACCGATAATG
TFAP2C_pENT_XhoI		TATGTctcgagTTATTTCCTGTGTTTCTCCA
BLIMP1_pENT_SpeI	For cloning GATA3 into pENTR1a	GGATCAactagtAAAATGGACATGGAGGATGCGGA
BLIMP1_pENT_XhoI		TGATATctcgagTTAAGGATCCATTGGTTCAACTGT
GATA2_pENT_SpeI	For cloning GATA2 into pENTR1a	TTATCAactagtGAGGTGGCGCCCGAGCAG
GATA2_pENT_XhoI		TGCCATctcgagCTAGCCCATGGCGGTCACCAT
MSX2_pENT_SpeI	For cloning MSX2 into pENTR1a	AAGCTTactagtGCTTCTCCGTCCAAAGGCAATGA
MSX2_pENT_XhoI		TGCCATctcgagTTAGGACAGGTGGTACATGCCAT
GATA3_pENT_SpeI	For cloning GATA3 into pENTR1a	TTATTAactagtGAGGTGACGGCGGACCAGCCGC
GATA3_pENT_XhoI		GTGTGTctcgagCTAACCCATGGCGGTGACCATGCT
gRNA_GATA3_exon2_1A5	CRISPR gRNA	caccgGTACTGCGCCGCGTCCATGT
gRNA_GATA3_exon2_1A3	CRISPR gRNA	aaacACATGGACGCGGCGCAGTACc
gRNA_GATA3_exon2_1B2_5	CRISPR gRNA	caccgGATGTGCTTTTTAACATCGA
gRNA_GATA3_exon2_1B2_3	CRISPR gRNA	aaacTCGATGTTAAAAAGCACATCc
gRNA_GATA2_exon2_1A5	CRISPR gRNA	caccgAGGGGTTGCCCTGCGAGTCG
gRNA_GATA2_exon2_1A3	CRISPR gRNA	aaacCGACTCGCAGGGCAACCCCTc
gRNA_GATA2_exon2_1B2_5	CRISPR gRNA	caccgATGCCAACCCCGCTCACGCG
gRNA_GATA2_exon2_1B2_3	CRISPR gRNA	aaacCGCGTGAGCGGGGTTGGCATc
GATA3 cut check 5	For sequencing GATA3 indels	CTTTCGTTTTGAGCCTTGGGCTTTC
GATA3 cut check 3		CTGAAGGACAAGTGGCATAGAAGGAACC
GATA2 cut check 5	For sequencing GATA2 indels	GATTTTTGTCTTCCCCTTCTTCTCTTTG
GATA2 cut check 3		CTGCGACTCTTTCAAAACACACTCTC
qPCR primers	POU5F1	CTGTCTCCGTCACCACTCTG
		AAACCCTGGCACAAACTCCA
	NANOG	AAAGAGGTCTCGTATTTGCTGC
		GAAACACTCGGTGAAATCAGGG
	SOX2	TAAGTACTGGCGAACCATCTCTG
		AATTACCAACGGTGTCAACCTG
	SOX17_UTR	TGTCTGCCACTTGAACAGTTT
		AGGAAGCTGTTTTGGGACAC
	SOX17_CDS	TTCGTGTGCAAGCCTGAGAT
		TAATATACCGCGGAGCTGGC
	BLIMP1_UTR	AAACCAAAGCATCACGTTGACA
		GGATGGATGGTGAGAGAAGCAA
	BLIMP1_CDS	CCTCAGGGTGCAGCCTTTAT
		AGGTACCAGAGGTAGTGGGT
	TFAP2C_UTR	ATTAAGAGGATGCTGGGCTCTG
		CACTGTACTGCACACTCACCTT
	TFAP2C_CDS	CATTTCAGCCTGATTACCCACG
		GAATCAGCTGGACTCTGGTCTC
	GATA3_UTR	GGATGCCAAGAAGTTTAAGGAA
		GCCAGTGAAAGGAAACAAAACT
	GATA3_CDS	GCATCCAGACCAGAAACCGA
		CGAGCTGTTCTTGGGGAAGT
	GATA2_UTR	GCACTTGGTCACTACATCAGC
		TAAACGTGTCCCGAGCTTAGA
	GATA2_CDS	TGAAGGGGGATGACTTCTCCT
		CAGACTCGGAACCGGAAGAT
	MSX2_UTR	AGCCCATTAAGTTCCCTGGT
		AAATTGTACAAGCACCCTTTCAA
	MSX2_CDS	CCGCCGCCAAGACATATGAG
		TTTCTGACGGAACTTGCGCT
	rBGpA	AGCCTAAATGATGGTGCTTGGT
		CCTTGTCAAAGTATGCAGCAGT
	NANOS3	TGGCAAGGGAAGAGCTGAAATC
		TTATTGAGGGCTGACTGGATGC
	PPIA	TTGATCATTTGGTGTGTTGGGC
		AAGACTGAGATGCACAAGTGGT
	RPLP0	GAAACTCTGCATTCTCGCTTCC
		ACTCGTTTGTACCCGTTGATGA
